# Supplementary material for: Transition-metal-free selective pyrimidines and pyridines formation from aromatic ketones, aldehydes and ammonium salts
Source: Royal Society of Chemistry journal article supplement (doi:10.1039/c9gc02077b), 2019-01-01

## Supporting Information

### Transition-metal-free selective pyrimidines and pyridines formation from aromatic ketones, aldehydes and ammonium salts

Jinjin Chen<sup>a</sup>, Huanxin Meng<sup>a</sup>, Feng Zhang<sup>a,b\*</sup>, Fuhong Xiao<sup>a</sup>, and Guo-Jun Deng<sup>a\*</sup>

<sup>a</sup> Key Laboratory for Green Organic Synthesis and Application of Hunan Province, Key Laboratory of Environmentally Friendly Chemistry and Application of Ministry of Education, College of Chemistry, Xiangtan University, Xiangtan 411105, China. E-mail: gjdeng@xtu.edu.cn

<sup>b</sup> College of Science, Hunan Agricultural University, Changsha, 410128, China. E-mail: zhangf@iccas.ac.cn

### Table of Contents

|                                                                        |       |
|------------------------------------------------------------------------|-------|
| 1. General information.....                                            | 2     |
| 2. General procedure for the synthesis of pyrimidines.....             | 2     |
| 3. General procedure for the synthesis of pyridines.....               | 2     |
| 4. Characterization data of products.....                              | 2-27  |
| 5. References.....                                                     | 28    |
| 6. <sup>1</sup> H and <sup>13</sup> C NMR spectra of all products..... | 29-78 |

## 1. General information

All reactions were carried out under an atmosphere of oxygen unless otherwise noted. Column chromatography was performed using silica gel (200-300 mesh).  $^1\text{H}$  NMR and  $^{13}\text{C}$  NMR spectra were recorded on Bruker-AV (400 and 100 MHz, respectively) instrument internally referenced to tetramethylsilane (TMS) or chloroform. Mass spectra was measured on Agilent 5975 GC-MS instrument (EI). High-resolution mass spectra (HRMS) was conducted using electrospraying ionization (ESI) and was performed on a Thermo Scientific LTQ Orbitrap XL at Keecloud (Shanghai) Biotechnology co. LTD. The structure of known compounds were further corroborated by comparing their  $^1\text{H}$  NMR,  $^{13}\text{C}$  NMR data and MS data with those of literature. All reagents were obtained from commercial suppliers and used without further purification unless otherwise noted.

## 2. General procedure for the synthesis of pyrimidines

A 10 mL oven-dried reaction vessel was charged with aromatic ketones (0.2 mmol), aromatic aldehydes (0.6 mmol), ammonium acetate (0.6 mmol),  $\text{NaIO}_4$  (0.08 mmol), DMSO (0.1 mmol) and chlorobenzene (0.8 mL). The reaction vessel was purged with oxygen for three times and stirred at 130 °C for 10 h. After cooling to room temperature, the volatiles were removed under reduced pressure. The residue was purified by column chromatography on silica gel to give the products.

## 3. General procedure for the synthesis of pyridines

A 10 mL oven-dried reaction vessel was charged with aromatic ketones (0.6 mmol), aromatic aldehydes (0.2 mmol), ammonium iodide (0.4 mmol), DMSO (0.6 mmol) and chlorobenzene (0.8 mL). The reaction vessel was purged with oxygen for three times and stirred at 130 °C for 12 h. After cooling to room temperature, the volatiles were removed under reduced pressure. The residue was purified by column chromatography on silica gel to give the products.

## 4. Characterization of products

### 2,4-Diphenyl-6-(*p*-tolyl)pyrimidine (3aa, CAS: 71103-76-9)<sup>[1]</sup>

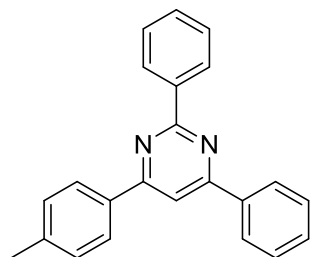

The reaction was conducted with 1-(*p*-tolyl)ethan-1-one (26.7  $\mu\text{L}$ , 0.2 mmol), benzaldehyde (61.2  $\mu\text{L}$ , 0.6 mmol), ammonium acetate (46.2 mg, 0.6 mmol),  $\text{NaIO}_4$  (17.2 mg, 0.08 mmol) and DMSO

(7.1  $\mu\text{L}$ , 0.1 mmol). The residue was purified by column chromatography on silica gel (petroleum ether/ethyl acetate = 100:1) to give **3aa** as white solid; yield: 50.2 mg (78%), mp 143-146  $^{\circ}\text{C}$ .

$^1\text{H}$  NMR (400 MHz,  $\text{CDCl}_3$ , ppm)  $\delta$  8.72 (d,  $J$  = 6.3 Hz, 2H), 8.28 (d,  $J$  = 8.0 Hz, 2H), 8.20 (d,  $J$  = 8.2 Hz, 2H), 7.98 (s, 1H), 7.57-7.51(m, 6H), 7.36 (d,  $J$  = 8.0 Hz, 2H), 2.45 (s, 3H);  $^{13}\text{C}$  NMR (100 MHz,  $\text{CDCl}_3$ , ppm)  $\delta$  164.6, 164.5, 164.4, 141.1, 138.2, 137.6, 134.6, 130.7, 130.5, 129.6, 128.8, 128.4, 128.4, 127.2, 127.1, 109.9, 21.5.

### 2,4,6-Tri-*p*-tolylpyrimidine (**3ab**)

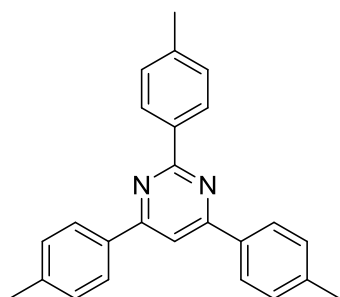

The reaction was conducted with 1-(*p*-tolyl)ethan-1-one (26.7  $\mu\text{L}$ , 0.2 mmol), 4-methylbenzaldehyde (71.0  $\mu\text{L}$ , 0.6 mmol), ammonium acetate (46.2 mg, 0.6 mmol),  $\text{NaIO}_4$  (17.2 mg, 0.08 mmol) and DMSO (7.1  $\mu\text{L}$ , 0.1 mmol). The residue was purified by column chromatography on silica gel (petroleum ether/ethyl acetate = 50:1) to give **3ab** as white solid; yield: 56.6 mg (81%), mp 238-240  $^{\circ}\text{C}$ .

$^1\text{H}$  NMR (400 MHz,  $\text{CDCl}_3$ , ppm)  $\delta$  8.61 (d,  $J$  = 8.0 Hz, 2H), 8.18 (d,  $J$  = 8.0 Hz, 4H), 7.93 (s, 1H), 7.34 (t,  $J$  = 7.9 Hz, 6H), 2.45 (s, 9H);  $^{13}\text{C}$  NMR (100 MHz,  $\text{CDCl}_3$ , ppm)  $\delta$  164.4, 164.4, 140.9, 140.6, 135.6, 134.9, 129.6, 129.1, 128.4, 127.1, 109.3, 21.5, 21.5; HRMS (ESI):  $m/z$  calcd for  $\text{C}_{25}\text{H}_{23}\text{N}_2^+$   $[\text{M}+\text{H}]^+$  351.1856, found 351.1855.

### 2,4-Bis(4-methoxyphenyl)-6-(*p*-tolyl)pyrimidine (**3ac**)

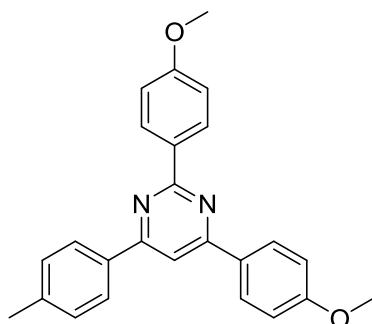

The reaction was conducted with 1-(*p*-tolyl)ethan-1-one (26.7  $\mu\text{L}$ , 0.2 mmol), 4-methylbenzaldehyde (72.9  $\mu\text{L}$ , 0.6 mmol), ammonium acetate (46.2 mg, 0.6 mmol),  $\text{NaIO}_4$  (17.2 mg, 0.08 mmol) and DMSO (7.1  $\mu\text{L}$ , 0.1 mmol). The residue was purified by column

chromatography on silica gel (petroleum ether/ethyl acetate = 50:1) to give **3ac** as white solid; yield: 53.5 mg (70%), mp 157-159 °C.

<sup>1</sup>H NMR (400 MHz, CDCl<sub>3</sub>, ppm) δ 8.67 (d, *J* = 8.2 Hz, 2H), 8.25 (d, *J* = 8.3 Hz, 2H), 8.17 (d, *J* = 7.7 Hz, 2H), 7.86 (s, 1H), 7.35 (d, *J* = 7.8 Hz, 2H), 7.05 (t, *J* = 7.0 Hz, 4H), 3.91 (s, 6H), 2.45 (s, 3H); <sup>13</sup>C NMR (100 MHz, CDCl<sub>3</sub>, ppm) δ 164.2, 164.0, 163.9, 161.7, 161.6, 140.9, 134.9, 131.1, 130.1, 130.0, 129.5, 128.7, 127.1, 114.1, 113.6, 108.4, 55.4, 55.3, 21.6; HRMS (ESI): *m/z* calcd for C<sub>25</sub>H<sub>23</sub>N<sub>2</sub>O<sub>2</sub><sup>+</sup> [M+H]<sup>+</sup> 383.1754, found 383.1752.

#### 2,4-Bis(4-(*tert*-butyl)phenyl)-6-(*p*-tolyl)pyrimidine (**3ad**)

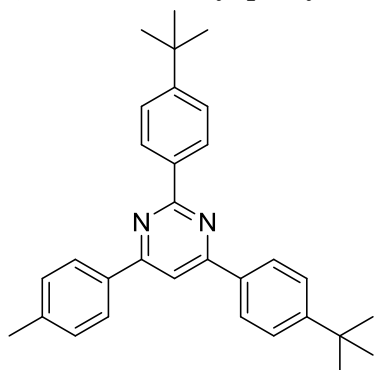

The reaction was conducted with 1-(*p*-tolyl)ethan-1-one (26.7 μL, 0.2 mmol), 4-(*tert*-butyl)benzaldehyde (100.3 μL, 0.6 mmol), ammonium acetate (46.2 mg, 0.6 mmol), NaIO<sub>4</sub> (17.2 mg, 0.08 mmol) and DMSO (7.1 μL, 0.1 mmol). The residue was purified by column chromatography on silica gel (petroleum ether/ethyl acetate = 100:1) to give **3ad** as white solid; yield: 53.5 mg (70%), mp 175-178 °C.

<sup>1</sup>H NMR (400 MHz, CDCl<sub>3</sub>, ppm) δ 8.63 (d, *J* = 8.5 Hz, 2H), 8.20 (t, *J* = 8.9 Hz, 4H), 7.95 (s, 1H), 7.57 (t, *J* = 8.5 Hz, 4H), 7.36 (d, *J* = 8.0 Hz, 2H), 2.46 (s, 3H), 1.40 (s, 18H); <sup>13</sup>C NMR (100 MHz, CDCl<sub>3</sub>, ppm) δ 164.4, 164.4, 164.3, 154.0, 153.7, 140.9, 135.6, 134.9, 134.8, 129.5, 128.2, 127.1, 127.0, 125.8, 125.3, 109.4, 34.8, 34.8, 31.3, 31.2, 21.5; HRMS (ESI): *m/z* calcd for C<sub>31</sub>H<sub>35</sub>N<sub>2</sub><sup>+</sup> [M+H]<sup>+</sup> 435.2795, found 435.2798.

#### 2,4-Bis(4-fluorophenyl)-6-(*p*-tolyl)pyrimidine (**3ae**)

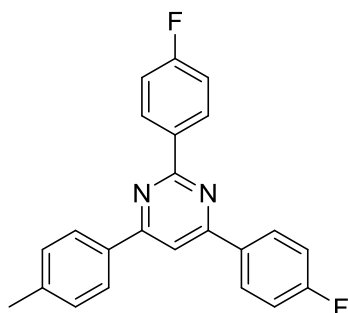

The reaction was conducted with 1-(*p*-tolyl)ethan-1-one (26.7 μL, 0.2 mmol), 4-fluorobenzaldehyde (64.4 μL, 0.6 mmol), ammonium acetate (46.2 mg, 0.6 mmol), NaIO<sub>4</sub> (17.2

mg, 0.08 mmol) and DMSO (7.1  $\mu$ L, 0.1 mmol). The residue was purified by column chromatography on silica gel (petroleum ether/ethyl acetate = 100:1) to give **3ae** as white solid; yield: 54.4 mg (76%), mp 193-196  $^{\circ}$ C.

$^1\text{H}$  NMR (400 MHz,  $\text{CDCl}_3$ , ppm)  $\delta$  8.70 (dd,  $J = 8.8, 5.7$  Hz, 2H), 8.26 (dd,  $J = 8.8, 5.4$  Hz, 2H), 8.16 (d,  $J = 8.1$  Hz, 2H), 7.91 (s, 1H), 7.35 (d,  $J = 8.0$  Hz, 2H), 7.25-7.15 (m, 4H), 2.46 (s, 3H);  $^{13}\text{C}$  NMR (100 MHz,  $\text{CDCl}_3$ , ppm)  $\delta$  164.9, 164.8 (d,  $J = 248.7$  Hz), 164.6 (d,  $J = 249.4$  Hz), 163.6, 141.32, 134.60, 134.37, 133.72, 130.6 (d,  $J = 8.5$  Hz), 129.7, 129.3 (d,  $J = 8.7$  Hz), 127.2, 115.9 (d,  $J = 21.6$  Hz), 115.3 (d,  $J = 21.5$  Hz), 109.4, 21.4; HRMS (ESI):  $m/z$  calcd for  $\text{C}_{23}\text{H}_{17}\text{F}_2\text{N}_2^+$   $[\text{M}+\text{H}]^+$  359.1354, found 359.1358.

#### 2,4-Bis(4-chlorophenyl)-6-(*p*-tolyl)pyrimidine (**3af**)

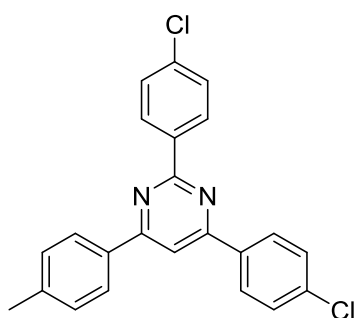

The reaction was conducted with 1-(*p*-tolyl)ethan-1-one (26.7  $\mu$ L, 0.2 mmol), 4-chlorobenzaldehyde (84.3 mg, 0.6 mmol), ammonium acetate (46.2 mg, 0.6 mmol),  $\text{NaIO}_4$  (17.2 mg, 0.08 mmol) and DMSO (7.1  $\mu$ L, 0.1 mmol). The residue was purified by column chromatography on silica gel (petroleum ether/ethyl acetate = 50:1) to give **3af** as white solid; yield: 49.6 mg (64%), mp 146-148  $^{\circ}$ C.

$^1\text{H}$  NMR (400 MHz,  $\text{CDCl}_3$ , ppm)  $\delta$  8.63 (d,  $J = 8.6$  Hz, 2H), 8.20 (d,  $J = 8.6$  Hz, 2H), 8.16 (d,  $J = 8.1$  Hz, 2H), 7.94 (s, 1H), 7.52 (d,  $J = 8.6$  Hz, 2H), 7.49 (d,  $J = 8.6$  Hz, 2H), 7.36 (d,  $J = 8.0$  Hz, 2H), 2.46 (s, 3H);  $^{13}\text{C}$  NMR (100 MHz,  $\text{CDCl}_3$ , ppm)  $\delta$  165.0, 163.5, 163.4, 141.5, 137.0, 136.9, 136.5, 135.9, 134.3, 129.8, 129.7, 129.2, 128.7, 128.5, 127.2, 109.8, 21.5; HRMS (ESI):  $m/z$  calcd for  $\text{C}_{23}\text{H}_{17}\text{Cl}_2\text{N}_2^+$   $[\text{M}+\text{H}]^+$  391.0763, found 391.0768.

#### 4-(*p*-Tolyl)-2,6-bis(4-(trifluoromethyl)phenyl)pyrimidine (**3ag**)

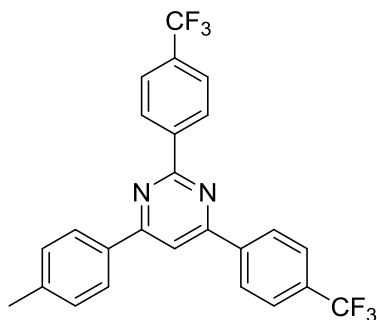

The reaction was conducted with 1-(*p*-tolyl)ethan-1-one (26.7  $\mu$ L, 0.2 mmol), 4-(trifluoromethyl)benzaldehyde (81.9  $\mu$ L, 0.6 mmol), ammonium acetate (46.2 mg, 0.6 mmol), NaIO<sub>4</sub> (17.2 mg, 0.08 mmol) and DMSO (7.1  $\mu$ L, 0.1 mmol). The residue was purified by column chromatography on silica gel (petroleum ether/ethyl acetate = 100:1) to give **3ag** as white solid; yield: 45.3 mg (49%), mp 211-213  $^{\circ}$ C.

<sup>1</sup>H NMR (400 MHz, CDCl<sub>3</sub>, ppm)  $\delta$  8.80 (d, *J* = 8.2 Hz, 2H), 8.37 (d, *J* = 8.1 Hz, 2H), 8.19 (d, *J* = 8.1 Hz, 2H), 8.04 (s, 1H), 7.82 (d, *J* = 8.3 Hz, 2H), 7.79 (d, *J* = 8.3 Hz, 2H), 7.38 (d, *J* = 8.1 Hz, 2H), 2.48 (s, 3H); <sup>13</sup>C NMR (100 MHz, CDCl<sub>3</sub>, ppm)  $\delta$  165.2, 163.2, 141.8, 141.1, 140.5, 133.9, 132.5 (q, *J* = 32.4 Hz), 132.3 (q, *J* = 32.1 Hz), 129.8, 128.7, 127.5, 127.2, 125.8 (q, *J* = 3.6 Hz), 125.3 (q, *J* = 3.7 Hz), 124.2 (q, *J* = 270.6 Hz), 123.9 (q, *J* = 270.7 Hz), 110.7, 21.5; HRMS (ESI): *m/z* calcd for C<sub>25</sub>H<sub>17</sub>F<sub>6</sub>N<sub>2</sub><sup>+</sup> [M+H]<sup>+</sup> 459.1290, found 459.1296.

#### 4-(*p*-Tolyl)-2,6-bis(4-(trifluoromethoxy)phenyl)pyrimidine (**3ah**)

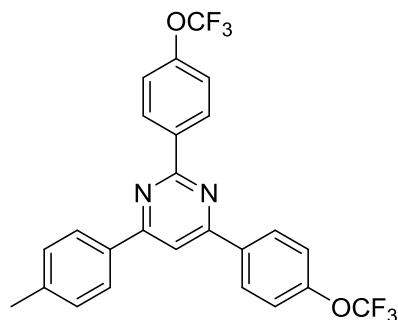

The reaction was conducted with 1-(*p*-tolyl)ethan-1-one (26.7  $\mu$ L, 0.2 mmol), 4-(trifluoromethoxy)benzaldehyde (85.7  $\mu$ L, 0.6 mmol), ammonium acetate (46.2 mg, 0.6 mmol), NaIO<sub>4</sub> (17.2 mg, 0.08 mmol) and DMSO (7.1  $\mu$ L, 0.1 mmol). The residue was purified by column chromatography on silica gel (petroleum ether/ethyl acetate = 100:1) to give **3ah** as white solid; yield: 41.2 mg (42%), mp 98-100  $^{\circ}$ C.

<sup>1</sup>H NMR (400 MHz, CDCl<sub>3</sub>, ppm)  $\delta$  8.73 (d, *J* = 8.8 Hz, 2H), 8.30 (d, *J* = 8.7 Hz, 2H), 8.17 (d, *J* = 8.0 Hz, 2H), 7.96 (s, 1H), 7.42-7.35 (m, 6H), 2.47 (s, 3H); <sup>13</sup>C NMR (100 MHz, CDCl<sub>3</sub>, ppm)  $\delta$  164.9, 163.3, 163.2, 151.2, 151.2, 141.6, 136.5, 135.9, 134.2, 130.1, 129.7, 128.8, 127.1, 121.0, 120.5, 120.5 (q, *J* = 257.2 Hz), 120.4 (q, *J* = 256.4 Hz), 109.8, 21.5; HRMS (ESI): *m/z* calcd for C<sub>25</sub>H<sub>17</sub>F<sub>6</sub>N<sub>2</sub>O<sub>2</sub><sup>+</sup> [M+H]<sup>+</sup> 491.1189, found 491.1186.

#### 2,4-Di-*m*-tolyl-6-(*p*-tolyl)pyrimidine (**3ai**)

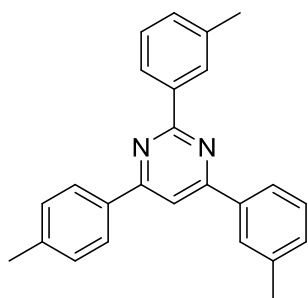

The reaction was conducted with 1-(*p*-tolyl)ethan-1-one (26.7  $\mu$ L, 0.2 mmol), 3-methylbenzaldehyde (70.7  $\mu$ L, 0.6 mmol), ammonium acetate (46.2 mg, 0.6 mmol), NaIO<sub>4</sub> (17.2 mg, 0.08 mmol) and DMSO (7.1  $\mu$ L, 0.1 mmol). The residue was purified by column chromatography on silica gel (petroleum ether/ethyl acetate = 50:1) to give **3ai** as white solid; yield: 51.5 mg (74%), mp 168-170 °C.

<sup>1</sup>H NMR (400 MHz, CDCl<sub>3</sub>, ppm)  $\delta$  8.52 (d, *J* = 6.1 Hz, 2H), 8.20 (d, *J* = 8.1 Hz, 2H), 8.10-8.05 (m, 2H), 7.96 (s, 1H), 7.47-7.41 (m, 2H), 7.38-7.30 (m, 4H), 2.51 (s, 6H), 2.46 (s, 3H); <sup>13</sup>C NMR (100 MHz, CDCl<sub>3</sub>, ppm)  $\delta$  164.8, 164.8, 164.5, 141.1, 138.6, 138.2, 138.0, 137.6, 134.7, 131.4, 131.3, 129.6, 128.9, 128.8, 128.3, 127.9, 127.2, 125.7, 124.4, 110.0, 21.6, 21.5; HRMS (ESI): *m/z* calcd for C<sub>25</sub>H<sub>23</sub>N<sub>2</sub><sup>+</sup> [M+H]<sup>+</sup> 351.1856, found 351.1855.

#### 2,4-Bis(3-methoxyphenyl)-6-(*p*-tolyl)pyrimidine (3aj)

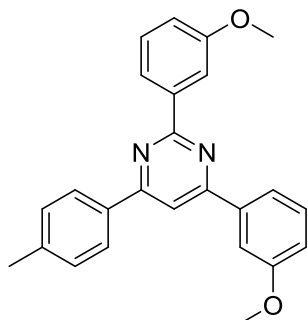

The reaction was conducted with 1-(*p*-tolyl)ethan-1-one (26.7  $\mu$ L, 0.2 mmol), 3-methoxybenzaldehyde (73.1  $\mu$ L, 0.6 mmol), ammonium acetate (46.2 mg, 0.6 mmol), NaIO<sub>4</sub> (17.2 mg, 0.08 mmol) and DMSO (7.1  $\mu$ L, 0.1 mmol). The residue was purified by column chromatography on silica gel (petroleum ether/ethyl acetate = 20:1) to give **3aj** as white solid; yield: 47.9 mg (63%), mp 132-135 °C.

<sup>1</sup>H NMR (400 MHz, CDCl<sub>3</sub>, ppm)  $\delta$  8.33 (d, *J* = 7.8 Hz, 1H), 8.28 (s, 1H), 8.19 (d, *J* = 8.2 Hz, 2H), 7.97 (s, 1H), 7.87 (s, 1H), 7.82 (d, *J* = 7.7 Hz, 1H), 7.49-7.44 (m, 2H), 7.36 (d, *J* = 8.0 Hz, 2H), 7.10-7.06 (m, 2H), 3.96 (s, 3H), 3.94 (s, 3H), 2.46 (s, 3H); <sup>13</sup>C NMR (100 MHz, CDCl<sub>3</sub>, ppm)  $\delta$  164.6, 164.3, 164.1, 160.1, 159.8, 141.2, 139.6, 139.0, 134.6, 129.9, 129.6, 129.4, 127.2, 121.0, 119.6, 116.4, 116.2, 113.5, 112.7, 110.2, 55.4, 55.4, 21.5; HRMS (ESI): *m/z* calcd for C<sub>25</sub>H<sub>23</sub>N<sub>2</sub>O<sub>2</sub><sup>+</sup> [M+H]<sup>+</sup> 383.1754, found 383.1752.

### 2,4-Bis(3-chlorophenyl)-6-(*p*-tolyl)pyrimidine (**3ak**)

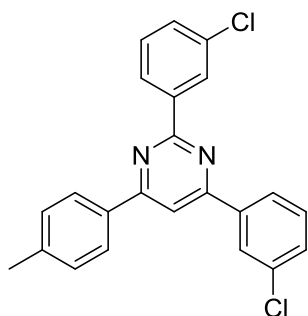

The reaction was conducted with 1-(*p*-tolyl)ethan-1-one (26.7  $\mu\text{L}$ , 0.2 mmol), 3-chlorobenzaldehyde (68.0  $\mu\text{L}$ , 0.6 mmol), ammonium acetate (46.2 mg, 0.6 mmol),  $\text{NaIO}_4$  (17.2 mg, 0.08 mmol) and DMSO (7.1  $\mu\text{L}$ , 0.1 mmol). The residue was purified by column chromatography on silica gel (petroleum ether/ethyl acetate = 50:1) to give **3ak** as white solid; yield: 46.8 mg (60%), mp 107-109  $^{\circ}\text{C}$ .

$^1\text{H}$  NMR (400 MHz,  $\text{CDCl}_3$ , ppm)  $\delta$  8.66 (s, 1H), 8.58 (d,  $J = 6.6$  Hz, 1H), 8.23 (s, 1H), 8.17 (d,  $J = 8.1$  Hz, 2H), 8.13 (d,  $J = 6.7$  Hz, 1H), 7.94 (s, 1H), 7.53-7.43 (m, 4H), 7.37 (d,  $J = 8.1$  Hz, 2H), 2.46 (s, 3H);  $^{13}\text{C}$  NMR (100 MHz,  $\text{CDCl}_3$ , ppm)  $\delta$  164.8, 163.0, 141.5, 139.7, 139.0, 135.0, 134.5, 133.9, 130.7, 130.6, 130.1, 129.6, 128.4, 127.2, 127.1, 126.5, 125.3, 110.1, 21.49; HRMS (ESI):  $m/z$  calcd for  $\text{C}_{23}\text{H}_{17}\text{Cl}_2\text{N}_2^+$   $[\text{M}+\text{H}]^+$  391.0763, found 391.0768.

### 2,4-Di-*o*-tolyl-6-(*p*-tolyl)pyrimidine (**3al**)

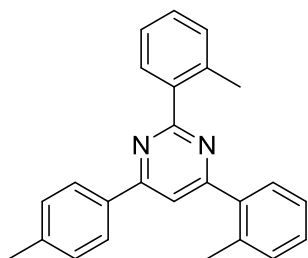

The reaction was conducted with 1-(*p*-tolyl)ethan-1-one (26.7  $\mu\text{L}$ , 0.2 mmol), 2-methylbenzaldehyde (69.4  $\mu\text{L}$ , 0.6 mmol), ammonium acetate (46.2 mg, 0.6 mmol),  $\text{NaIO}_4$  (17.2 mg, 0.08 mmol) and DMSO (7.1  $\mu\text{L}$ , 0.1 mmol). The residue was purified by column chromatography on silica gel (petroleum ether/ethyl acetate = 50:1) to give **3al** as white solid; yield: 31.6 mg (45%), mp 123-125  $^{\circ}\text{C}$ .

$^1\text{H}$  NMR (400 MHz,  $\text{CDCl}_3$ , ppm)  $\delta$  8.13 (d,  $J = 7.8$  Hz, 2H), 8.02 (d,  $J = 7.3$  Hz, 1H), 7.72 (s, 1H), 7.56 (d,  $J = 7.4$  Hz, 1H), 7.40-7.33 (m, 8H), 2.72 (s, 3H), 2.54 (s, 3H), 2.44 (s, 3H);  $^{13}\text{C}$  NMR (100 MHz,  $\text{CDCl}_3$ , ppm)  $\delta$  167.8, 167.1, 163.7, 141.2, 138.7, 138.6, 137.5, 136.1, 134.4, 131.2, 131.1, 130.8, 129.7, 129.6, 129.2, 127.2, 126.1, 125.8, 113.4, 21.7, 21.4, 20.6; HRMS (ESI):  $m/z$  calcd for  $\text{C}_{25}\text{H}_{23}\text{N}_2^+$   $[\text{M}+\text{H}]^+$  351.1856, found 351.1855.



### 2,4-Bis(3,4-dimethylphenyl)-6-(*p*-tolyl)pyrimidine (**3am**)

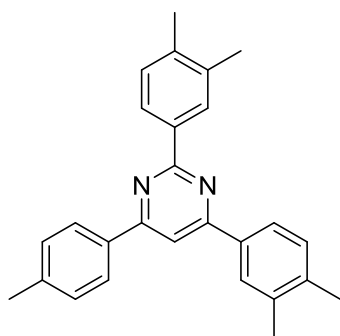

The reaction was conducted with 1-(*p*-tolyl)ethan-1-one (26.7  $\mu\text{L}$ , 0.2 mmol), 3,4-dimethylbenzaldehyde (79.6  $\mu\text{L}$ , 0.6 mmol), ammonium acetate (46.2 mg, 0.6 mmol),  $\text{NaIO}_4$  (17.2 mg, 0.08 mmol) and DMSO (7.1  $\mu\text{L}$ , 0.1 mmol). The residue was purified by column chromatography on silica gel (petroleum ether/ethyl acetate = 100:1) to give **3am** as white solid; yield: 30.9 mg (41%), mp 196-198  $^\circ\text{C}$ .

$^1\text{H}$  NMR (400 MHz,  $\text{CDCl}_3$ , ppm)  $\delta$  8.47 (s, 1H), 8.44 (d,  $J = 7.9$  Hz, 1H), 8.19 (d,  $J = 8.1$  Hz, 2H), 8.05 (s, 1H), 8.00 (d,  $J = 7.8$  Hz, 1H), 7.92 (s, 1H), 7.36 (d,  $J = 8.0$  Hz, 2H), 7.30 (t,  $J = 7.2$  Hz, 2H), 2.46 (s, 3H), 2.41 (s, 6H), 2.36 (s, 6H);  $^{13}\text{C}$  NMR (100 MHz,  $\text{CDCl}_3$ , ppm)  $\delta$  164.6, 164.5, 164.3, 140.8, 139.6, 139.3, 137.1, 136.5, 136.0, 135.3, 135.0, 130.1, 129.7, 129.5, 129.4, 128.3, 127.1, 126.0, 124.7, 109.4, 21.5, 20.0, 20.0, 19.9, 19.8; HRMS (ESI):  $m/z$  calcd for  $\text{C}_{27}\text{H}_{27}\text{N}_2^+$   $[\text{M}+\text{H}]^+$  379.2169, found 379.2168.

### 2,4-Di(naphthalen-2-yl)-6-(*p*-tolyl)pyrimidine (**3an**)

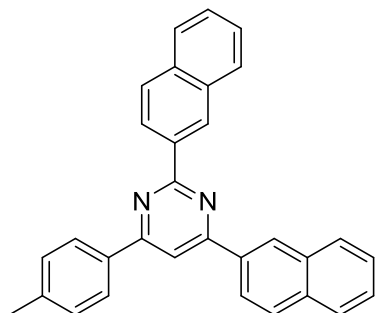

The reaction was conducted with 1-(*p*-tolyl)ethan-1-one (26.7  $\mu\text{L}$ , 0.2 mmol), 2-naphthaldehyde (93.7 mg, 0.6 mmol), ammonium acetate (46.2 mg, 0.6 mmol),  $\text{NaIO}_4$  (17.2 mg, 0.08 mmol) and DMSO (7.1  $\mu\text{L}$ , 0.1 mmol). The residue was purified by column chromatography on silica gel (petroleum ether/ethyl acetate = 50:1) to give **3an** as white solid; yield: 57.4 mg (68%), mp 219-222  $^\circ\text{C}$ .

$^1\text{H}$  NMR (400 MHz,  $\text{CDCl}_3$ , ppm)  $\delta$  9.27 (s, 1H), 8.86 (d,  $J = 8.6$  Hz, 1H), 8.80 (s, 1H), 8.43 (d,  $J = 8.5$  Hz, 1H), 8.27 (d,  $J = 8.1$  Hz, 2H), 8.13 (s, 1H), 8.10-8.00 (m, 4H), 7.94-7.91 (m, 2H), 7.60-7.53 (m, 4H), 7.40 (d,  $J = 7.9$  Hz, 2H), 2.48 (s, 3H);  $^{13}\text{C}$  NMR (100 MHz,  $\text{CDCl}_3$ , ppm)  $\delta$

164.8, 164.6, 164.5, 141.2, 135.7, 135.0, 134.7, 134.6, 133.4, 133.3, 129.7, 129.4, 129.3, 129.0, 128.7, 128.1, 128.0, 127.8, 127.7, 127.4, 127.3, 126.9, 126.6, 126.1, 125.6, 125.2, 124.3, 110.3, 21.5; HRMS (ESI):  $m/z$  calcd for  $C_{31}H_{23}N_2^+$   $[M+H]^+$  423.1856, found 423.1853.

#### 2,4,6-Triphenylpyrimidine (**3ba**, CAS: 1666-86-0)<sup>[1]</sup>

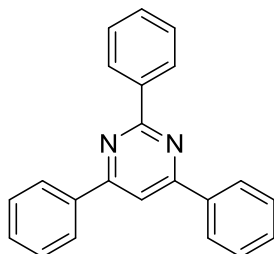

The reaction was conducted with acetophenone (23.4  $\mu$ L, 0.2 mmol), benzaldehyde (61.2  $\mu$ L, 0.6 mmol), ammonium acetate (46.2 mg, 0.6 mmol),  $NaIO_4$  (17.2 mg, 0.08 mmol) and DMSO (7.1  $\mu$ L, 0.1 mmol). The residue was purified by column chromatography on silica gel (petroleum ether/ethyl acetate = 100:1) to give **3ba** as white solid; yield: 45.7 mg (74%), mp 190-191  $^{\circ}C$ .

$^1H$  NMR (400 MHz,  $CDCl_3$ , ppm)  $\delta$  8.74 (d,  $J = 7.0$  Hz, 2H), 8.30 (d,  $J = 6.7$  Hz, 4H), 8.02 (s, 1H), 7.56 (t,  $J = 6.7$  Hz, 9H);  $^{13}C$  NMR (100 MHz,  $CDCl_3$ , ppm)  $\delta$  164.7, 164.4, 138.1, 137.4, 130.8, 130.6, 128.9, 128.9, 128.4, 127.3, 110.3.

#### 4-(4-Methoxyphenyl)-2,6-diphenylpyrimidine (**3ca**, CAS: 67073-24-9)<sup>[2]</sup>

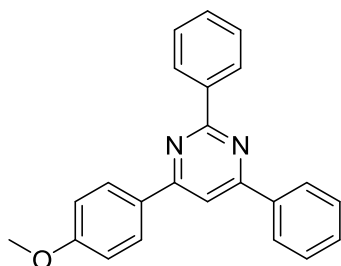

The reaction was conducted with 1-(4-methoxyphenyl)ethan-1-one (30.0 mg, 0.2 mmol), benzaldehyde (61.2  $\mu$ L, 0.6 mmol), ammonium acetate (46.2 mg, 0.6 mmol),  $NaIO_4$  (17.2 mg, 0.08 mmol) and DMSO (7.1  $\mu$ L, 0.1 mmol). The residue was purified by column chromatography on silica gel (petroleum ether/ethyl acetate = 50:1) to give **3ca** as white solid; yield: 37.4 mg (55%), mp 139-140  $^{\circ}C$ .

$^1H$  NMR (400 MHz,  $CDCl_3$ , ppm)  $\delta$  8.72 (d,  $J = 6.5$  Hz, 2H), 8.28 (d,  $J = 7.9$  Hz, 4H), 7.95 (s, 1H), 7.54 (t,  $J = 7.7$  Hz, 6H), 7.07 (d,  $J = 8.4$  Hz, 2H), 3.91 (s, 3H);  $^{13}C$  NMR (100 MHz,  $CDCl_3$ , ppm)  $\delta$  164.4, 164.3, 164.2, 161.9, 138.3, 137.7, 130.6, 130.5, 129.9, 128.8, 128.7, 128.4, 128.4, 127.2, 114.2, 109.4, 55.4.

#### 4-(4-(*tert*-Butyl)phenyl)-2,6-diphenylpyrimidine (**3da**)<sup>[2]</sup>

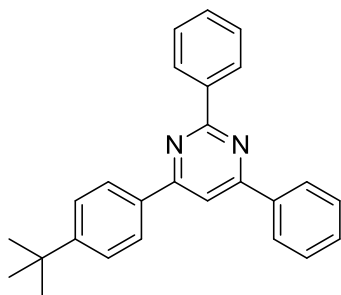

The reaction was conducted with 1-(4-(*tert*-butyl)phenyl)ethan-1-one (36.6  $\mu\text{L}$ , 0.2 mmol), benzaldehyde (61.2  $\mu\text{L}$ , 0.6 mmol), ammonium acetate (46.2 mg, 0.6 mmol),  $\text{NaIO}_4$  (17.2 mg, 0.08 mmol) and DMSO (7.1  $\mu\text{L}$ , 0.1 mmol). The residue was purified by column chromatography on silica gel (petroleum ether/ethyl acetate = 100:1) to give **3da** as white solid; yield: 41.7 mg (57%), mp 132-134  $^\circ\text{C}$ .

$^1\text{H}$  NMR (400 MHz,  $\text{CDCl}_3$ , ppm)  $\delta$  8.73 (d,  $J = 7.7$  Hz, 2H), 8.29 (d,  $J = 7.7$  Hz, 2H), 8.23 (d,  $J = 7.7$  Hz, 2H), 8.00 (s, 1H), 7.56 (q,  $J = 9.2$  Hz, 8H), 1.40 (s, 9H).  $^{13}\text{C}$  NMR (100 MHz,  $\text{CDCl}_3$ , ppm)  $\delta$  164.7, 164.5, 164.4, 154.2, 138.2, 137.6, 134.7, 130.7, 130.5, 128.9, 128.4, 128.4, 127.2, 127.0, 125.9, 110.0, 34.9, 31.2.

#### 4-(4-Isobutylphenyl)-2,6-diphenylpyrimidine (**3ea**)

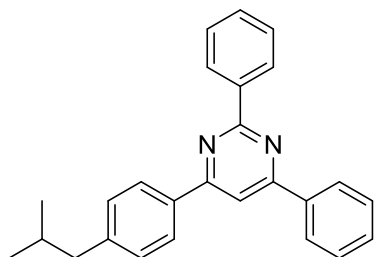

The reaction was conducted with 1-(4-isobutylphenyl)ethan-1-one (37.0  $\mu\text{L}$ , 0.2 mmol), benzaldehyde (61.2  $\mu\text{L}$ , 0.6 mmol), ammonium acetate (46.2 mg, 0.6 mmol),  $\text{NaIO}_4$  (17.2 mg, 0.08 mmol) and DMSO (7.1  $\mu\text{L}$ , 0.1 mmol). The residue was purified by column chromatography on silica gel (petroleum ether/ethyl acetate = 100:1) to give **3ea** as white solid; yield: 47.3 mg (65%), mp 88-91  $^\circ\text{C}$ .

$^1\text{H}$  NMR (400 MHz,  $\text{CDCl}_3$ , ppm)  $\delta$  8.73 (d,  $J = 7.3$  Hz, 2H), 8.29 (d,  $J = 7.1$  Hz, 2H), 8.21 (d,  $J = 7.6$  Hz, 2H), 8.00 (s, 1H), 7.54 (t,  $J = 6.9$  Hz, 6H), 7.33 (d,  $J = 7.7$  Hz, 2H), 2.58 (d,  $J = 7.1$  Hz, 2H), 1.99-1.89 (m, 1H), 0.95 (d,  $J = 6.5$  Hz, 6H);  $^{13}\text{C}$  NMR (100 MHz,  $\text{CDCl}_3$ , ppm)  $\delta$  164.7, 164.4, 164.3, 144.9, 138.2, 137.5, 134.9, 130.6, 130.5, 129.6, 128.8, 128.4, 128.4, 127.2, 127.0, 109.9, 45.2, 30.2, 22.3; HRMS (ESI):  $m/z$  calcd for  $\text{C}_{26}\text{H}_{25}\text{N}_2^+$   $[\text{M}+\text{H}]^+$  365.2012, found 365.2012.

#### 4-(4-Fluorophenyl)-2,6-diphenylpyrimidine (**3fa**)<sup>[1]</sup>

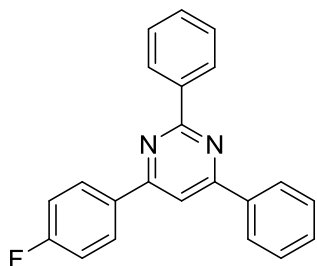

The reaction was conducted with 1-(4-fluorophenyl)ethan-1-one (24.2  $\mu\text{L}$ , 0.2 mmol), benzaldehyde (61.2  $\mu\text{L}$ , 0.6 mmol), ammonium acetate (46.2 mg, 0.6 mmol),  $\text{NaIO}_4$  (17.2 mg, 0.08 mmol) and DMSO (7.1  $\mu\text{L}$ , 0.1 mmol). The residue was purified by column chromatography on silica gel (petroleum ether/ethyl acetate = 100:1) to give **3fa** as white solid; yield: 51.0 mg (78%), mp 166-167  $^\circ\text{C}$ .

$^1\text{H}$  NMR (400 MHz,  $\text{CDCl}_3$ , ppm)  $\delta$  8.71 (d,  $J = 7.9$  Hz, 2H), 8.40-8.17 (m, 4H), 7.96 (s, 1H), 7.66-7.47 (m, 6H), 7.29-7.19 (m, 3H);  $^{13}\text{C}$  NMR (100 MHz,  $\text{CDCl}_3$ , ppm)  $\delta$  164.8, 164.6 (d,  $J = 249.6$  Hz), 164.4, 163.30, 138.0, 137.4, 133.6, 130.8 (d,  $J = 13.0$  Hz), 129.3 (d,  $J = 8.4$  Hz), 128.9, 128.6, 128.4, 128.4, 127.2, 115.9 (d,  $J = 21.7$  Hz), 109.8.

#### 4-(4-Chlorophenyl)-2,6-diphenylpyrimidine (**3ga**)<sup>[2]</sup>

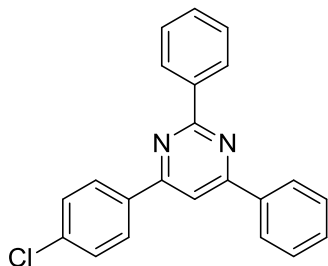

The reaction was conducted with 1-(4-chlorophenyl)ethan-1-one (25.9  $\mu\text{L}$ , 0.2 mmol), benzaldehyde (61.2  $\mu\text{L}$ , 0.6 mmol), ammonium acetate (46.2 mg, 0.6 mmol),  $\text{NaIO}_4$  (17.2 mg, 0.08 mmol) and DMSO (7.1  $\mu\text{L}$ , 0.1 mmol). The residue was purified by column chromatography on silica gel (petroleum ether/ethyl acetate = 100:1) to give **3ga** as white solid; yield: 56.9 mg (83%), mp 165-166  $^\circ\text{C}$ .

$^1\text{H}$  NMR (400 MHz,  $\text{CDCl}_3$ , ppm)  $\delta$  8.71 (d,  $J = 7.9$  Hz, 2H), 8.28 (d,  $J = 7.8$  Hz, 2H), 8.24 (d,  $J = 8.6$  Hz, 2H), 7.97 (s, 1H), 7.59-7.49 (m, 8H);  $^{13}\text{C}$  NMR (100 MHz,  $\text{CDCl}_3$ , ppm)  $\delta$  164.8, 164.4, 163.3, 137.9, 137.2, 136.9, 135.8, 130.8, 130.7, 129.0, 128.9, 128.5, 128.4, 128.5, 127.2, 109.8.

#### 4-(4-Bromophenyl)-2,6-diphenylpyrimidine (**3ha**, CAS: 58536-46-2)<sup>[3]</sup>

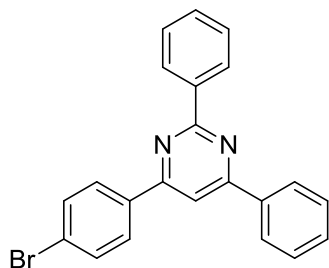

The reaction was conducted with 1-(4-bromophenyl)ethan-1-one (39.8 mg, 0.2 mmol), benzaldehyde (61.2  $\mu$ L, 0.6 mmol), ammonium acetate (46.2 mg, 0.6 mmol), NaIO<sub>4</sub> (17.2 mg, 0.08 mmol) and DMSO (7.1  $\mu$ L, 0.1 mmol). The residue was purified by column chromatography on silica gel (petroleum ether/ethyl acetate = 100:1) to give **3ha** as white solid; yield: 62.3 mg (81%), mp 169-171 °C.

<sup>1</sup>H NMR (400 MHz, CDCl<sub>3</sub>, ppm)  $\delta$  8.71 (d, *J* = 7.9 Hz, 2H), 8.28 (d, *J* = 7.8 Hz, 2H), 8.17 (d, *J* = 8.4 Hz, 2H), 7.97 (s, 1H), 7.69 (d, *J* = 8.5 Hz, 2H), 7.60-7.50 (m, 6H); <sup>13</sup>C NMR (100 MHz, CDCl<sub>3</sub>, ppm)  $\delta$  164.9, 164.5, 163.5, 137.9, 137.2, 136.3, 132.1, 130.9, 130.8, 128.9, 128.7, 128.5, 128.4, 127.2, 125.4, 109.9.

#### 4-(2,6-Diphenylpyrimidin-4-yl)benzonitrile (**3ia**)

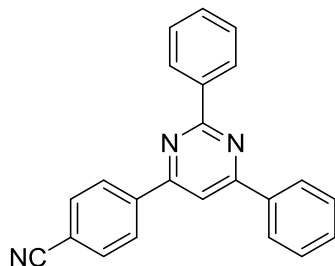

The reaction was conducted with 4-acetylbenzonitrile (29.0 mg, 0.2 mmol), benzaldehyde (61.2  $\mu$ L, 0.6 mmol), ammonium acetate (46.2 mg, 0.6 mmol), NaIO<sub>4</sub> (17.2 mg, 0.08 mmol) and DMSO (7.1  $\mu$ L, 0.1 mmol). The residue was purified by column chromatography on silica gel (petroleum ether/ethyl acetate = 50:1) to give **3ia** as white solid; yield: 41.3 mg (62%), mp 181-183 °C.

<sup>1</sup>H NMR (400 MHz, CDCl<sub>3</sub>, ppm)  $\delta$  8.70 (d, *J* = 7.7 Hz, 2H), 8.39 (d, *J* = 8.4 Hz, 2H), 8.28 (d, *J* = 6.0 Hz, 2H), 8.01 (s, 1H), 7.85 (d, *J* = 8.4 Hz, 2H), 7.61-7.52 (m, 6H); <sup>13</sup>C NMR (100 MHz, CDCl<sub>3</sub>, ppm)  $\delta$  165.2, 164.6, 162.4, 141.5, 137.5, 136.9, 132.6, 131.1, 131.0, 129.0, 128.5, 128.4, 127.7, 127.2, 118.5, 114.0, 110.4; HRMS (ESI): *m/z* calcd for C<sub>23</sub>H<sub>16</sub>N<sub>3</sub><sup>+</sup> [M+H]<sup>+</sup> 334.1339, found 334.1338.

#### 4-(4-Nitrophenyl)-2,6-diphenylpyrimidine (**3ja**, CAS: 13573-34-7)<sup>[4]</sup>

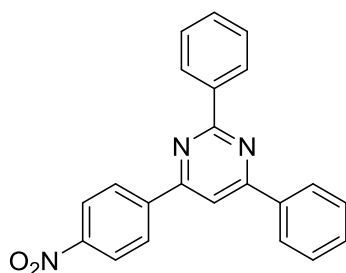

The reaction was conducted with 1-(4-nitrophenyl)ethan-1-one (33.0 mg, 0.2 mmol), benzaldehyde (61.2  $\mu$ L, 0.6 mmol), ammonium acetate (46.2 mg, 0.6 mmol), NaIO<sub>4</sub> (17.2 mg, 0.08 mmol) and DMSO (7.1  $\mu$ L, 0.1 mmol). The residue was purified by column chromatography on silica gel (petroleum ether/ethyl acetate = 5:1) to give **3ja** as yellow solid; yield: 30.3 mg (43%), mp 216-218 °C.

<sup>1</sup>H NMR (400 MHz, CDCl<sub>3</sub>, ppm)  $\delta$  8.72 (d,  $J$  = 5.5 Hz, 2H), 8.51-8.39 (m, 4H), 8.31 (d,  $J$  = 5.9 Hz, 2H), 8.08 (s, 1H), 7.58 (d,  $J$  = 10.5 Hz, 6H); <sup>13</sup>C NMR (100 MHz, CDCl<sub>3</sub>, ppm)  $\delta$  165.5, 164.9, 162.3, 149.2, 143.4, 137.5, 136.9, 131.2, 131.1, 129.0, 128.6, 128.5, 128.2, 127.3, 124.1, 110.8.

#### 4-(4-(Methylsulfonyl)phenyl)-2,6-diphenylpyrimidine (3ka)

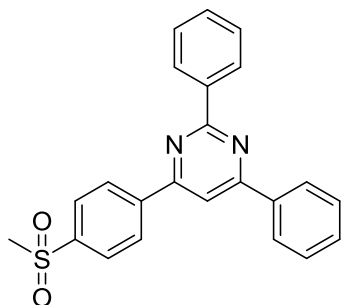

The reaction was conducted with 1-(4-(methylsulfonyl)phenyl)ethan-1-one (39.7 mg, 0.2 mmol), benzaldehyde (61.2  $\mu$ L, 0.6 mmol), ammonium acetate (46.2 mg, 0.6 mmol), NaIO<sub>4</sub> (17.2 mg, 0.08 mmol) and DMSO (7.1  $\mu$ L, 0.1 mmol). The residue was purified by column chromatography on silica gel (petroleum ether/ethyl acetate = 4:1) to give **3ka** as yellow solid; yield: 28.1 mg (36%), mp 201-203 °C.

<sup>1</sup>H NMR (400 MHz, CDCl<sub>3</sub>, ppm)  $\delta$  8.72 (d,  $J$  = 7.3 Hz, 2H), 8.47 (d,  $J$  = 7.2 Hz, 2H), 8.30 (d,  $J$  = 5.0 Hz, 2H), 8.14 (d,  $J$  = 7.3 Hz, 2H), 8.05 (s, 1H), 7.57 (d,  $J$  = 10.6 Hz, 6H), 3.14 (s, 3H); <sup>13</sup>C NMR (100 MHz, CDCl<sub>3</sub>, ppm)  $\delta$  165.4, 164.8, 162.7, 142.7, 142.0, 137.6, 136.9, 131.2, 131.0, 129.0, 128.5, 128.4, 128.2, 128.0, 127.3, 110.8, 44.5; HRMS (ESI):  $m/z$  calcd for C<sub>23</sub>H<sub>19</sub>N<sub>2</sub>O<sub>2</sub>S<sup>+</sup> [M+H]<sup>+</sup> 387.1162, found 387.1161.

#### 2,4-Diphenyl-6-(*m*-tolyl)pyrimidine (3la)<sup>[5]</sup>

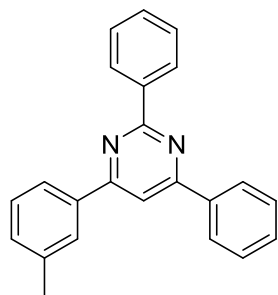

The reaction was conducted with 1-(*m*-tolyl)ethan-1-one (27.2  $\mu$ L, 0.2 mmol), benzaldehyde (61.2  $\mu$ L, 0.6 mmol), ammonium acetate (46.2 mg, 0.6 mmol), NaIO<sub>4</sub> (17.2 mg, 0.08 mmol) and DMSO (7.1  $\mu$ L, 0.1 mmol). The residue was purified by column chromatography on silica gel (petroleum ether/ethyl acetate = 100:1) to give **3la** as white solid; yield: 41.5 mg (64%), mp 127-129 °C.

<sup>1</sup>H NMR (400 MHz, CDCl<sub>3</sub>, ppm)  $\delta$  8.73 (d, *J* = 8.0 Hz, 2H), 8.30 (d, *J* = 8.0 Hz, 2H), 8.10 (s, 1H), 8.07 (d, *J* = 7.8 Hz, 1H), 8.01 (s, 1H), 7.58-7.52 (m, 6H), 7.45 (t, *J* = 7.6 Hz, 1H), 7.36 (d, *J* = 7.5 Hz, 1H), 2.51 (s, 3H); <sup>13</sup>C NMR (100 MHz, CDCl<sub>3</sub>, ppm)  $\delta$  164.8, 164.5, 164.4, 138.5, 138.1, 137.5, 137.4, 131.5, 130.7, 130.5, 128.8, 128.7, 128.4, 128.4, 127.8, 127.2, 124.4, 110.3, 21.6.

#### 4-(3-Chlorophenyl)-2,6-diphenylpyrimidine (**3ma**)<sup>[31]</sup>

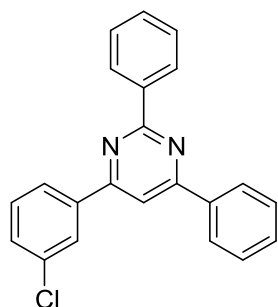

The reaction was conducted with 1-(3-chlorophenyl)ethan-1-one (26.0  $\mu$ L, 0.2 mmol), benzaldehyde (61.2  $\mu$ L, 0.6 mmol), ammonium acetate (46.2 mg, 0.6 mmol), NaIO<sub>4</sub> (17.2 mg, 0.08 mmol) and DMSO (7.1  $\mu$ L, 0.1 mmol). The residue was purified by column chromatography on silica gel (petroleum ether/ethyl acetate = 100:1) to give **3ma** as white solid; yield: 59.3 mg (87%), mp 152-154 °C.

<sup>1</sup>H NMR (400 MHz, CDCl<sub>3</sub>, ppm)  $\delta$  8.72 (d, *J* = 7.9 Hz, 2H), 8.53 (s, 1H), 8.48 (d, *J* = 7.8 Hz, 1H), 8.31 (d, *J* = 7.9 Hz, 2H), 8.03 (s, 1H), 7.80 (d, *J* = 7.7 Hz, 1H), 7.70 (t, *J* = 7.8 Hz, 1H), 7.60-7.54 (m, 6H); <sup>13</sup>C NMR (100 MHz, CDCl<sub>3</sub>, ppm)  $\delta$  165.1, 164.6, 163.1, 138.3, 137.7, 137.1, 131.0, 130.9, 130.4, 129.4, 128.9, 128.5, 128.5, 127.3, 127.2, 124.0, 124.0, 110.2.

#### 2,4-Diphenyl-6-(*o*-tolyl)pyrimidine (**3na**)<sup>[5]</sup>

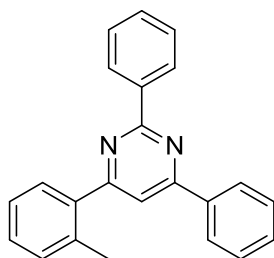

The reaction was conducted with 1-(*o*-tolyl)ethan-1-one (26.2  $\mu$ L, 0.2 mmol), benzaldehyde (61.2  $\mu$ L, 0.6 mmol), ammonium acetate (46.2 mg, 0.6 mmol), NaIO<sub>4</sub> (17.2 mg, 0.08 mmol) and DMSO (7.1  $\mu$ L, 0.1 mmol). The residue was purified by column chromatography on silica gel (petroleum ether/ethyl acetate = 100:1) to give **3na** as yellow liquid; yield: 25.2 mg (39%).

<sup>1</sup>H NMR (400 MHz, CDCl<sub>3</sub>, ppm)  $\delta$  8.67 (d,  $J$  = 7.9 Hz, 2H), 8.28 (d,  $J$  = 7.9 Hz, 2H), 7.74 (s, 1H), 7.62-7.50 (m, 7H), 7.42-7.33 (m, 3H), 2.58 (s, 3H); <sup>13</sup>C NMR (100 MHz, CDCl<sub>3</sub>, ppm)  $\delta$  168.1, 164.1, 164.0, 138.6, 138.1, 137.3, 136.5, 131.2, 130.8, 130.6, 129.6, 129.4, 128.9, 128.4, 127.2, 126.1, 114.3, 20.7.

#### 4-(2-Chlorophenyl)-2,6-diphenylpyrimidine (**3oa**)<sup>[3]</sup>

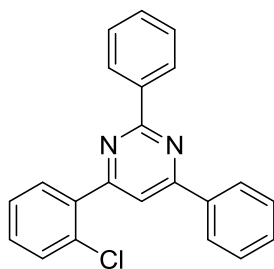

The reaction was conducted with 1-(2-chlorophenyl)ethan-1-one (30.9 mg, 0.2 mmol), benzaldehyde (61.2  $\mu$ L, 0.6 mmol), ammonium acetate (46.2 mg, 0.6 mmol), NaIO<sub>4</sub> (17.2 mg, 0.08 mmol) and DMSO (7.1  $\mu$ L, 0.1 mmol). The residue was purified by column chromatography on silica gel (petroleum ether/ethyl acetate = 100:1) to give **3oa** as white solid; yield: 36.6 mg (53%), mp 124-126 °C.

<sup>1</sup>H NMR (400 MHz, CDCl<sub>3</sub>, ppm)  $\delta$  8.67 (d,  $J$  = 8.0 Hz, 2H), 8.28 (d,  $J$  = 7.9 Hz, 2H), 8.02 (s, 1H), 7.85 (d,  $J$  = 7.7 Hz, 1H), 7.54 (dd,  $J$  = 13.4, 5.7 Hz, 7H), 7.48-7.41 (m, 2H); <sup>13</sup>C NMR (100 MHz, CDCl<sub>3</sub>, ppm)  $\delta$  164.6, 164.6, 163.8, 137.9, 137.5, 137.2, 132.4, 131.7, 130.9, 130.7, 130.6, 130.4, 128.9, 128.4, 128.4, 127.3, 127.2, 115.1.

#### 4-(2-Bromophenyl)-2,6-diphenylpyrimidine (**3pa**)



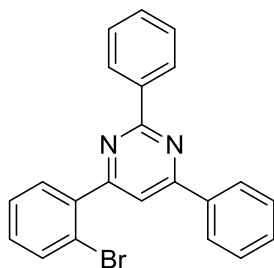

The reaction was conducted with 1-(2-bromophenyl)ethan-1-one (27.0  $\mu$ L, 0.2 mmol), benzaldehyde (61.2  $\mu$ L, 0.6 mmol), ammonium acetate (46.2 mg, 0.6 mmol), NaIO<sub>4</sub> (17.2 mg, 0.08 mmol) and DMSO (7.1  $\mu$ L, 0.1 mmol). The residue was purified by column chromatography on silica gel (petroleum ether/ethyl acetate = 100:1) to give **3pa** as white solid; yield: 31.8 mg (41%), mp 140-143  $^{\circ}$ C.

<sup>1</sup>H NMR (400 MHz, CDCl<sub>3</sub>, ppm)  $\delta$  8.68 (d,  $J$  = 7.8 Hz, 2H), 8.29 (d,  $J$  = 7.8 Hz, 2H), 7.97 (s, 1H), 7.75 (d,  $J$  = 7.9 Hz, 2H), 7.58-7.47 (m, 7H), 7.35 (t,  $J$  = 7.7 Hz, 1H); <sup>13</sup>C NMR (100 MHz, CDCl<sub>3</sub>, ppm)  $\delta$  166.0, 164.5, 163.8, 139.5, 137.9, 137.2, 133.7, 131.6, 130.9, 130.7, 130.7, 128.9, 128.5, 128.5, 127.7, 127.3, 121.6, 115.0; HRMS (ESI):  $m/z$  calcd for C<sub>22</sub>H<sub>16</sub>BrN<sub>2</sub><sup>+</sup> [M+H]<sup>+</sup> 387.0491, found 387.0490.

#### 4-(3,4-Dimethoxyphenyl)-2,6-diphenylpyrimidine (3qa)

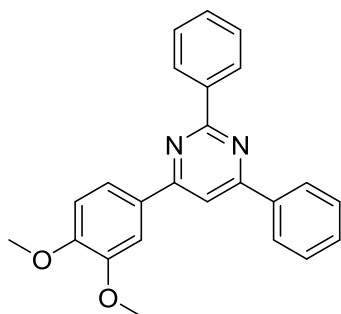

The reaction was conducted with 1-(3,4-dimethoxyphenyl)ethan-1-one (36.0 mg, 0.2 mmol), benzaldehyde (61.2  $\mu$ L, 0.6 mmol), ammonium acetate (46.2 mg, 0.6 mmol), NaIO<sub>4</sub> (17.2 mg, 0.08 mmol) and DMSO (7.1  $\mu$ L, 0.1 mmol). The residue was purified by column chromatography on silica gel (petroleum ether/ethyl acetate = 10:1) to give **3qa** as yellow solid; yield: 37.0 mg (50%), mp 104-107  $^{\circ}$ C.

<sup>1</sup>H NMR (400 MHz, CDCl<sub>3</sub>, ppm)  $\delta$  8.71 (d,  $J$  = 7.8 Hz, 2H), 8.29 (d,  $J$  = 7.7 Hz, 2H), 7.95 (s, 2H), 7.84 (d,  $J$  = 8.4 Hz, 1H), 7.55 (t,  $J$  = 7.5 Hz, 6H), 7.02 (d,  $J$  = 8.4 Hz, 1H), 4.07 (s, 3H), 3.98 (s, 3H); <sup>13</sup>C NMR (100 MHz, CDCl<sub>3</sub>, ppm)  $\delta$  164.3, 164.2, 164.1, 151.4, 149.2, 138.1, 137.5, 130.6, 130.5, 130.1, 128.8, 128.4, 128.3, 127.2, 120.2, 110.9, 109.9, 109.5, 56.0, 55.9; HRMS (ESI):  $m/z$  calcd for C<sub>24</sub>H<sub>21</sub>N<sub>2</sub>O<sub>2</sub><sup>+</sup> [M+H]<sup>+</sup> 369.1598, found 369.1597.

#### 4-(3,4-Dichlorophenyl)-2,6-diphenylpyrimidine (3ra)

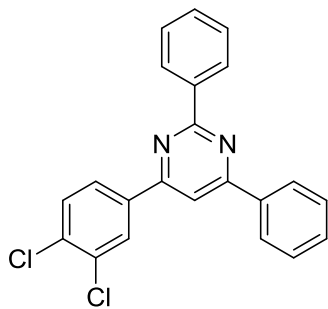

The reaction was conducted with 1-(3,4-dichlorophenyl)ethan-1-one (37.8 mg, 0.2 mmol), benzaldehyde (61.2  $\mu\text{L}$ , 0.6 mmol), ammonium acetate (46.2 mg, 0.6 mmol),  $\text{NaIO}_4$  (17.2 mg, 0.08 mmol) and DMSO (7.1  $\mu\text{L}$ , 0.1 mmol). The residue was purified by column chromatography on silica gel (petroleum ether/ethyl acetate = 100:1) to give **3ra** as white solid; yield: 55.0 mg (73%), mp 134-136  $^\circ\text{C}$ .

$^1\text{H}$  NMR (400 MHz,  $\text{CDCl}_3$ , ppm)  $\delta$  8.69 (d,  $J = 5.1$  Hz, 2H), 8.39 (s, 1H), 8.28 (d,  $J = 3.9$  Hz, 2H), 8.10 (d,  $J = 8.5$  Hz, 1H), 7.94 (s, 1H), 7.62 (d,  $J = 8.3$  Hz, 1H), 7.55 (d,  $J = 8.1$  Hz, 6H);  $^{13}\text{C}$  NMR (100 MHz,  $\text{CDCl}_3$ )  $\delta$  165.1, 164.6, 162.2, 137.6, 137.3, 137.0, 134.9, 133.3, 131.0, 130.9, 130.8, 129.1, 128.9, 128.5, 128.4, 127.3, 126.2, 109.9; HRMS (ESI):  $m/z$  calcd for  $\text{C}_{22}\text{H}_{15}\text{Cl}_2\text{N}_2^+$   $[\text{M}+\text{H}]^+$  377.0607, found 377.0606.

#### 4-(2,5-Dichlorophenyl)-2,6-diphenylpyrimidine (3sa)

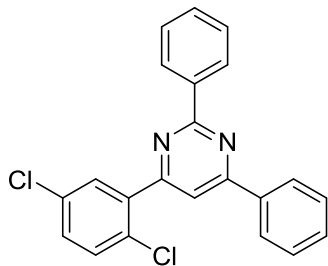

The reaction was conducted with 1-(2,5-dichlorophenyl)ethan-1-one (28.8  $\mu\text{L}$ , 0.2 mmol), benzaldehyde (61.2  $\mu\text{L}$ , 0.6 mmol), ammonium acetate (46.2 mg, 0.6 mmol),  $\text{NaIO}_4$  (17.2 mg, 0.08 mmol) and DMSO (7.1  $\mu\text{L}$ , 0.1 mmol). The residue was purified by column chromatography on silica gel (petroleum ether/ethyl acetate = 100:1) to give **3sa** as white solid; yield: 42.2 mg (56%), mp 115-118  $^\circ\text{C}$ .

$^1\text{H}$  NMR (400 MHz,  $\text{CDCl}_3$ , ppm)  $\delta$  8.67 (d,  $J = 7.8$  Hz, 2H), 8.28 (d,  $J = 7.7$  Hz, 2H), 8.01 (s, 1H), 7.85 (s, 1H), 7.57-7.53 (m, 6H), 7.49 (d,  $J = 8.6$  Hz, 1H), 7.41 (d,  $J = 8.6$  Hz, 1H);  $^{13}\text{C}$  NMR (100 MHz,  $\text{CDCl}_3$ , ppm)  $\delta$  164.7, 164.1, 163.3, 138.8, 137.6, 137.0, 133.2, 131.6, 131.5, 131.0, 130.9, 130.7, 130.6, 129.0, 128.5, 128.4, 127.4, 114.9; HRMS (ESI):  $m/z$  calcd for  $\text{C}_{22}\text{H}_{15}\text{Cl}_2\text{N}_2^+$   $[\text{M}+\text{H}]^+$  377.0607, found 377.0606.

#### 2,4-Diphenyl-6-(pyridin-4-yl)pyrimidine (3ta)<sup>[2]</sup>

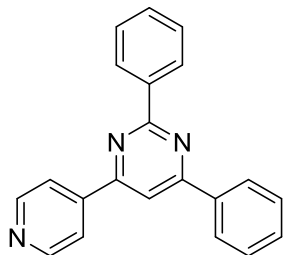

The reaction was conducted with 4-acetylpyridine (22.1  $\mu\text{L}$ , 0.2 mmol), benzaldehyde (61.2  $\mu\text{L}$ , 0.6 mmol), ammonium acetate (46.2 mg, 0.6 mmol),  $\text{NaIO}_4$  (17.2 mg, 0.08 mmol) and DMSO (7.1  $\mu\text{L}$ , 0.1 mmol). The residue was purified by column chromatography on silica gel (petroleum ether/ethyl acetate = 5:1) to give **3ta** as yellow solid; yield: 36.9 mg (60%), mp 214-216  $^\circ\text{C}$ .

$^1\text{H}$  NMR (400 MHz,  $\text{CDCl}_3$ , ppm)  $\delta$  8.84 (d,  $J = 6.1$  Hz, 2H), 8.72 (d,  $J = 7.8$  Hz, 2H), 8.30 (d,  $J = 7.6$  Hz, 2H), 8.14 (d,  $J = 6.1$  Hz, 2H), 8.04 (s, 1H), 7.57 (dd,  $J = 9.1, 5.4$  Hz, 6H);  $^{13}\text{C}$  NMR (100 MHz,  $\text{CDCl}_3$ , ppm)  $\delta$  165.3, 164.8, 162.2, 150.6, 144.7, 137.5, 136.8, 131.1, 131.0, 129.0, 128.5, 128.4, 127.2, 121.1, 110.4.

#### 2,4-Diphenyl-6-(thiophen-3-yl)pyrimidine (**3ua**)<sup>[2]</sup>

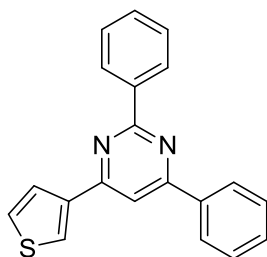

The reaction was conducted with 3-acetylthiophene (25.2 mg, 0.2 mmol), benzaldehyde (61.2  $\mu\text{L}$ , 0.6 mmol), ammonium acetate (46.2 mg, 0.6 mmol),  $\text{NaIO}_4$  (17.2 mg, 0.08 mmol) and DMSO (7.1  $\mu\text{L}$ , 0.1 mmol). The residue was purified by column chromatography on silica gel (petroleum ether/ethyl acetate = 100:1) to give **3ua** as white solid; yield: 38.7 mg (62%), mp 169-171  $^\circ\text{C}$ .

$^1\text{H}$  NMR (400 MHz,  $\text{CDCl}_3$ , ppm)  $\delta$  8.70 (d,  $J = 7.9$  Hz, 2H), 8.31 (d,  $J = 3.0$  Hz, 1H), 8.28 (d,  $J = 7.9$  Hz, 2H), 7.89 (d,  $J = 5.1$  Hz, 1H), 7.85 (s, 1H), 7.55 (dd,  $J = 10.1, 7.2$  Hz, 6H), 7.48 (dd,  $J = 5.0, 3.0$  Hz, 1H);  $^{13}\text{C}$  NMR (100 MHz,  $\text{CDCl}_3$ , ppm)  $\delta$  164.7, 164.5, 160.4, 140.8, 138.0, 137.4, 130.8, 130.6, 128.9, 128.4, 128.4, 127.2, 126.7, 126.6, 126.2, 110.1.

#### 4-(Naphthalen-2-yl)-2,6-diphenylpyrimidine (**3va**)<sup>[6]</sup>

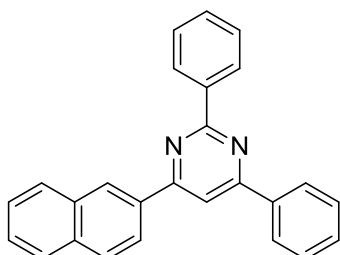

The reaction was conducted with 2-acetylnaphthalene (34.0 mg, 0.2 mmol), benzaldehyde (61.2  $\mu\text{L}$ , 0.6 mmol), ammonium acetate (46.2 mg, 0.6 mmol),  $\text{NaIO}_4$  (17.2 mg, 0.08 mmol) and DMSO (7.1  $\mu\text{L}$ , 0.1 mmol). The residue was purified by column chromatography on silica gel (petroleum ether/ethyl acetate = 100:1) to give **3va** as white solid; yield: 46.2 mg (65%), mp 157-159  $^\circ\text{C}$ .

$^1\text{H}$  NMR (400 MHz,  $\text{CDCl}_3$ , ppm)  $\delta$  8.78 (s, 2H), 8.77 (s, 1H), 8.40 (d,  $J = 8.6$  Hz, 1H), 8.34 (d,  $J = 8.0$  Hz, 2H), 8.16 (s, 1H), 8.03 (t,  $J = 8.7$  Hz, 2H), 7.92 (d,  $J = 6.0$  Hz, 1H), 7.56 (q,  $J = 7.7$  Hz, 8H);  $^{13}\text{C}$  NMR (100 MHz,  $\text{CDCl}_3$ , ppm)  $\delta$  164.8, 164.6, 164.5, 138.2, 137.5, 134.8, 134.6, 133.3, 130.8, 130.7, 129.0, 128.9, 128.7, 128.5, 128.5, 127.8, 127.4, 127.3, 126.6, 124.2, 110.5.

#### 2,4,6-Tri-*p*-tolylpyridine (**4ab**, CAS: 16112-42-8)<sup>[7]</sup>

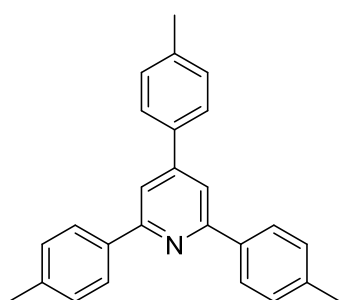

The reaction was conducted with 1-(*p*-tolyl)ethan-1-one (80.1  $\mu\text{L}$ , 0.6 mmol), 4-methylbenzaldehyde (23.7  $\mu\text{L}$ , 0.2 mmol), ammonium iodide (58.0 mg, 0.4 mmol) and DMSO (42.6  $\mu\text{L}$ , 0.6 mmol). The residue was purified by column chromatography on silica gel (petroleum ether/ethyl acetate = 100:1) to give **4ab** as white solid; yield: 52.5 mg (75%), mp 180-183  $^\circ\text{C}$ .

$^1\text{H}$  NMR (400 MHz,  $\text{CDCl}_3$ , ppm)  $\delta$  8.09 (d,  $J = 8.0$  Hz, 4H), 7.83 (s, 2H), 7.65 (d,  $J = 8.0$  Hz, 2H), 7.32 (t,  $J = 7.1$  Hz, 6H), 2.44 (s, 3H), 2.43 (s, 6H);  $^{13}\text{C}$  NMR (100 MHz,  $\text{CDCl}_3$ , ppm)  $\delta$  157.3, 149.8, 138.9, 138.9, 136.9, 136.2, 129.8, 129.4, 127.0, 116.3, 21.3, 21.2.

#### 4-(4-Methoxyphenyl)-2,6-di-*p*-tolylpyridine (**4ac**, CAS: 75573-10-3)<sup>[8]</sup>

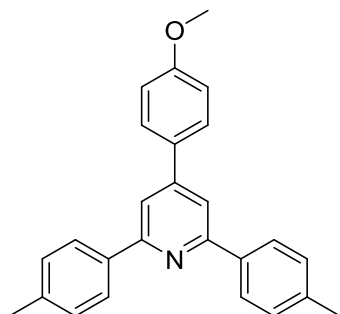

The reaction was conducted with 1-(*p*-tolyl)ethan-1-one (80.1  $\mu\text{L}$ , 0.6 mmol), 4-methoxybenzaldehyde (24.3  $\mu\text{L}$ , 0.2 mmol), ammonium iodide (58.0 mg, 0.4 mmol) and DMSO (42.6  $\mu\text{L}$ , 0.6 mmol). The residue was purified by column chromatography on silica gel

(petroleum ether/ethyl acetate = 50:1) to give **4ac** as white solid; yield: 56.9 mg (78%), mp 156-159 °C.

<sup>1</sup>H NMR (400 MHz, CDCl<sub>3</sub>, ppm) δ 8.09 (d, *J* = 7.9 Hz, 4H), 7.80 (s, 2H), 7.70 (d, *J* = 8.7 Hz, 2H), 7.31 (d, *J* = 7.9 Hz, 4H), 7.04 (d, *J* = 8.5 Hz, 2H), 3.88 (s, 3H), 2.43 (s, 6H); <sup>13</sup>C NMR (100 MHz, CDCl<sub>3</sub>, ppm) δ 160.3, 157.2, 149.3, 138.8, 136.9, 131.3, 129.3, 128.2, 126.9, 115.9, 114.4, 55.3, 21.3.

#### 4-(4-(*tert*-Butyl)phenyl)-2,6-di-*p*-tolylpyridine (**4ad**)<sup>[9]</sup>

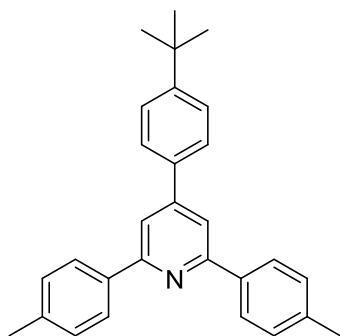

The reaction was conducted with 1-(*p*-tolyl)ethan-1-one (80.1 μL, 0.6 mmol), 4-(*tert*-butyl)benzaldehyde (33.4 μL, 0.2 mmol), ammonium iodide (58.0 mg, 0.4 mmol) and DMSO (42.6 μL, 0.6 mmol). The residue was purified by column chromatography on silica gel (petroleum ether/ethyl acetate = 100:1) to give **4ad** as white solid; yield: 63.5 mg (81%), mp 137-140 °C.

<sup>1</sup>H NMR (400 MHz, CDCl<sub>3</sub>, ppm) δ 8.09 (d, *J* = 6.5 Hz, 4H), 7.84 (s, 2H), 7.69 (d, *J* = 8.1 Hz, 2H), 7.55 (d, *J* = 8.1 Hz, 2H), 7.32 (d, *J* = 7.9 Hz, 4H), 2.43 (s, 6H), 1.39 (s, 9H); <sup>13</sup>C NMR (100 MHz, CDCl<sub>3</sub>, ppm) δ 157.2, 152.1, 149.8, 138.8, 136.9, 136.2, 129.4, 126.9, 126.8, 126.0, 116.4, 34.7, 31.3, 21.3.

#### 4-(4-Chlorophenyl)-2,6-di-*p*-tolylpyridine (**4af**)<sup>[10]</sup>

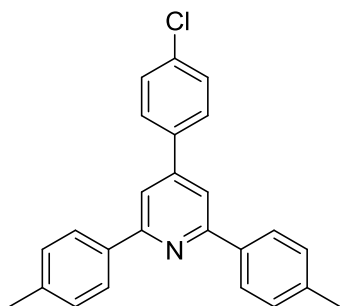

The reaction was conducted with 1-(*p*-tolyl)ethan-1-one (80.1 μL, 0.6 mmol), 4-chlorobenzaldehyde (28.1 mg, 0.2 mmol), ammonium iodide (58.0 mg, 0.4 mmol) and DMSO (42.6 μL, 0.6 mmol). The residue was purified by column chromatography on silica gel

(petroleum ether/ethyl acetate = 100:1) to give **4af** as white solid; yield: 47.9 mg (65%), mp 185-188 °C.

<sup>1</sup>H NMR (400 MHz, CDCl<sub>3</sub>, ppm) δ 8.09 (d, *J* = 8.2 Hz, 4H), 7.79 (s, 2H), 7.67 (d, *J* = 8.4 Hz, 2H), 7.49 (d, *J* = 8.4 Hz, 2H), 7.32 (d, *J* = 7.9 Hz, 4H); <sup>13</sup>C NMR (100 MHz, CDCl<sub>3</sub>, ppm) δ 157.5, 148.7, 139.1, 137.6, 136.6, 135.0, 129.4, 129.2, 128.4, 126.9, 116.1, 21.3.

#### 4-(*m*-Tolyl)-2,6-di-*p*-tolylpyridine (**4ai**)

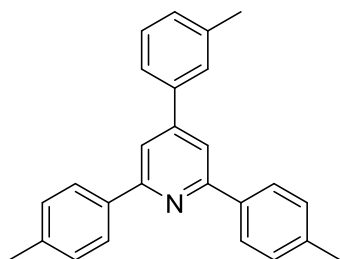

The reaction was conducted with 1-(*p*-tolyl)ethan-1-one (80.1 μL, 0.6 mmol), 3-methylbenzaldehyde (23.6 μL, 0.2 mmol), ammonium iodide (58.0 mg, 0.4 mmol) and DMSO (42.6 μL, 0.6 mmol). The residue was purified by column chromatography on silica gel (petroleum ether/ethyl acetate = 100:1) to give **4ai** as yellow solid; yield: 51.9 mg (74%), mp 106-108 °C.

<sup>1</sup>H NMR (400 MHz, CDCl<sub>3</sub>, ppm) δ 8.10 (d, *J* = 7.8 Hz, 4H), 7.83 (s, 2H), 7.54 (d, *J* = 6.4 Hz, 2H), 7.41 (t, *J* = 7.9 Hz, 1H), 7.32 (d, *J* = 7.9 Hz, 4H), 7.28 (d, *J* = 7.7 Hz, 1H), 2.47 (s, 3H), 2.43 (s, 6H); <sup>13</sup>C NMR (100 MHz, CDCl<sub>3</sub>, ppm) δ 157.2, 150.1, 139.2, 138.9, 138.7, 136.9, 129.6, 129.3, 128.9, 127.8, 126.9, 124.2, 116.5, 21.5, 21.3; HRMS (ESI): *m/z* calcd for C<sub>26</sub>H<sub>24</sub>N<sup>+</sup> [M+H]<sup>+</sup> 350.1903, found 350.1901.

#### 4-(*o*-Tolyl)-2,6-di-*p*-tolylpyridine (**4al**)

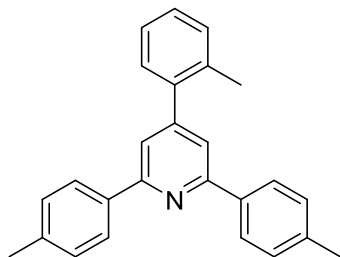

The reaction was conducted with 1-(*p*-tolyl)ethan-1-one (80.1 μL, 0.6 mmol), 2-methylbenzaldehyde (23.1 μL, 0.2 mmol), ammonium iodide (58.0 mg, 0.4 mmol) and DMSO (42.6 μL, 0.6 mmol). The residue was purified by column chromatography on silica gel (petroleum ether/ethyl acetate = 100:1) to give **4al** as white solid; yield: 50.1 mg (72%), mp 122-125 °C.

$^1\text{H}$  NMR (400 MHz,  $\text{CDCl}_3$ , ppm)  $\delta$  8.07 (d,  $J = 8.0$  Hz, 4H), 7.61 (s, 2H), 7.31 (t,  $J = 8.2$  Hz, 8H), 2.42 (s, 6H), 2.35 (s, 3H);  $^{13}\text{C}$  NMR (100 MHz,  $\text{CDCl}_3$ , ppm)  $\delta$  156.6, 151.1, 139.9, 138.9, 136.7, 135.1, 130.6, 129.4, 129.2, 128.2, 126.9, 126.0, 118.7, 21.3, 20.4; HRMS (ESI):  $m/z$  calcd for  $\text{C}_{26}\text{H}_{24}\text{N}^+$   $[\text{M}+\text{H}]^+$  350.1903, found 350.1901.

#### 4-Phenyl-2,6-di-*p*-tolylpyridine (4aa, CAS: 16112-41-7)<sup>[11]</sup>

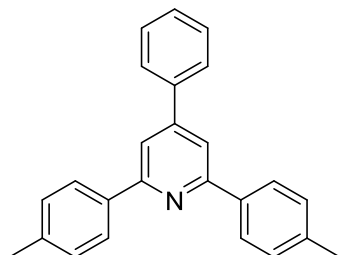

The reaction was conducted with 1-(*p*-tolyl)ethan-1-one (80.1  $\mu\text{L}$ , 0.6 mmol), benzaldehyde (20.4  $\mu\text{L}$ , 0.2 mmol), ammonium iodide (58.0 mg, 0.4 mmol) and DMSO (42.6  $\mu\text{L}$ , 0.6 mmol). The residue was purified by column chromatography on silica gel (petroleum ether/ethyl acetate = 100:1) to give **4aa** as yellow solid; yield: 51.3 mg (77%), mp 146-149  $^\circ\text{C}$ .

$^1\text{H}$  NMR (400 MHz,  $\text{CDCl}_3$ , ppm)  $\delta$  8.10 (d,  $J = 8.2$  Hz, 4H), 7.84 (s, 2H), 7.74 (d,  $J = 7.0$  Hz, 2H), 7.55-7.45 (m, 3H), 7.32 (d,  $J = 8.0$  Hz, 4H);  $^{13}\text{C}$  NMR (100 MHz,  $\text{CDCl}_3$ , ppm)  $\delta$  157.3, 149.9, 139.2, 138.9, 136.8, 129.4, 129.0, 128.8, 127.1, 126.9, 116.5, 21.3.

#### 2,4,6-Triphenylpyridine (4ba, CAS: 580-35-8)<sup>[11]</sup>

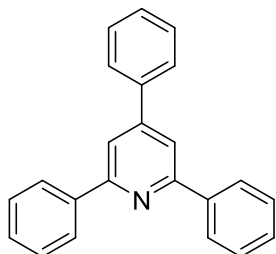

The reaction was conducted with acetophenone (70.2  $\mu\text{L}$ , 0.6 mmol), benzaldehyde (20.4  $\mu\text{L}$ , 0.2 mmol), ammonium iodide (58.0 mg, 0.4 mmol) and DMSO (42.6  $\mu\text{L}$ , 0.6 mmol). The residue was purified by column chromatography on silica gel (petroleum ether/ethyl acetate = 100:1) to give **4ba** as white solid; yield: 50.4 mg (82%), mp 140-141  $^\circ\text{C}$ .

$^1\text{H}$  NMR (400 MHz,  $\text{CDCl}_3$ , ppm)  $\delta$  8.21 (d,  $J = 7.2$  Hz, 4H), 7.90 (s, 2H), 7.76 (d,  $J = 7.0$  Hz, 2H), 7.56-7.43 (m, 9H);  $^{13}\text{C}$  NMR (100 MHz,  $\text{CDCl}_3$ , ppm)  $\delta$  157.4, 150.1, 139.5, 139.0, 129.1, 129.0, 128.9, 128.7, 127.1, 127.1, 117.1.

#### 2,6-Bis(4-chlorophenyl)-4-phenylpyridine (4ga, CAS:72666-43-4)<sup>[12]</sup>

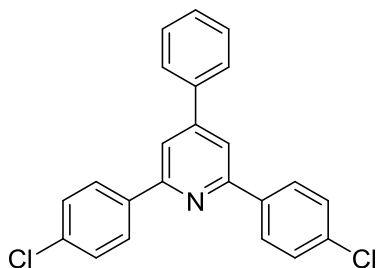

The reaction was conducted with 1-(4-chlorophenyl)ethan-1-one (77.7  $\mu\text{L}$ , 0.6 mmol), benzaldehyde (20.4  $\mu\text{L}$ , 0.2 mmol), ammonium iodide (58.0 mg, 0.4 mmol) and DMSO (42.6  $\mu\text{L}$ , 0.6 mmol). The residue was purified by column chromatography on silica gel (petroleum ether/ethyl acetate = 100:1) to give **4ga** as white solid; yield: 71.3 mg (95%), mp 186-188  $^{\circ}\text{C}$ .

$^1\text{H}$  NMR (400 MHz,  $\text{CDCl}_3$ , ppm)  $\delta$  8.13 (d,  $J$  = 8.5 Hz, 4H), 7.86 (s, 2H), 7.73 (d,  $J$  = 7.1 Hz, 2H), 7.56-7.26 (m, 7H);  $^{13}\text{C}$  NMR (100 MHz,  $\text{CDCl}_3$ , ppm)  $\delta$  156.3, 150.5, 138.6, 137.7, 135.2, 129.2, 129.2, 128.9, 128.3, 127.1, 117.1.

#### 4-Phenyl-2,6-di-*m*-tolylpyridine (**4la**)<sup>[13]</sup>

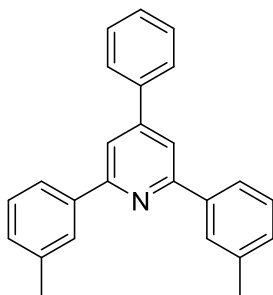

The reaction was conducted with 1-(*m*-tolyl)ethan-1-one (81.6  $\mu\text{L}$ , 0.6 mmol), benzaldehyde (20.4  $\mu\text{L}$ , 0.2 mmol), ammonium iodide (58.0 mg, 0.4 mmol) and DMSO (42.6  $\mu\text{L}$ , 0.6 mmol). The residue was purified by column chromatography on silica gel (petroleum ether/ethyl acetate = 100:1) to give **4la** as white solid; yield: 58.9 mg (88%), mp 153-156  $^{\circ}\text{C}$ .

$^1\text{H}$  NMR (400 MHz,  $\text{CDCl}_3$ , ppm)  $\delta$  8.01 (s, 2H), 7.97 (d,  $J$  = 7.8 Hz, 2H), 7.87 (s, 2H), 7.76 (d,  $J$  = 7.2 Hz, 2H), 7.54 (t,  $J$  = 7.3 Hz, 2H), 7.48 (t,  $J$  = 7.3 Hz, 1H), 7.41 (t,  $J$  = 7.6 Hz, 2H), 7.26 (d,  $J$  = 9.7 Hz, 3H), 2.48 (s, 6H);  $^{13}\text{C}$  NMR (100 MHz,  $\text{CDCl}_3$ , ppm)  $\delta$  157.7, 150.0, 139.6, 139.0, 138.3, 129.8, 129.0, 128.9, 128.6, 127.8, 127.1, 124.3, 117.2, 21.6.

#### 2,6-Bis(3-chlorophenyl)-4-phenylpyridine (**4ma**)<sup>[11]</sup>



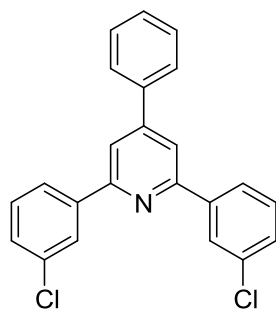

The reaction was conducted with 1-(3-chlorophenyl)ethan-1-one (78.0  $\mu\text{L}$ , 0.6 mmol), benzaldehyde (20.4  $\mu\text{L}$ , 0.2 mmol), ammonium iodide (58.0 mg, 0.4 mmol) and DMSO (42.6  $\mu\text{L}$ , 0.6 mmol). The residue was purified by column chromatography on silica gel (petroleum ether/ethyl acetate = 100:1) to give **4ma** as white solid; yield: 68.5 mg (91%), mp 175-178  $^{\circ}\text{C}$ .

$^1\text{H}$  NMR (400 MHz,  $\text{CDCl}_3$ , ppm)  $\delta$  8.18 (s, 2H), 8.06 (d,  $J = 7.0$  Hz, 2H), 7.88 (s, 2H), 7.74 (d,  $J = 6.9$  Hz, 2H), 7.57-7.42 (m, 7H).  $^{13}\text{C}$  NMR (100 MHz,  $\text{CDCl}_3$ , ppm)  $\delta$  156.1, 150.6, 141.0, 138.4, 134.8, 130.0, 129.2, 129.2, 129.1, 127.2, 127.1, 125.2, 117.6.

#### 4-([1,1'-biphenyl]-4-yl)-2,6-diphenylpyrimidine (**5a**)

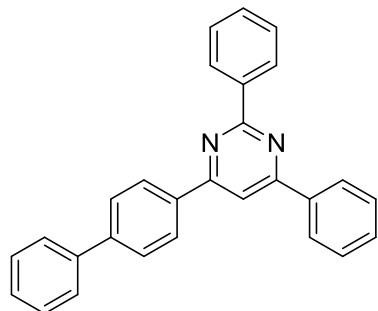

A 10 mL oven-dried reaction vessel was charged with 4-(4-bromophenyl)-2,6-diphenylpyrimidine (0.2 mmol, 77.2 mg), phenylboronic acid (0.26 mmol, 31.7 mg),  $\text{Pd}(\text{PPh}_3)_4$  (0.01 mmol, 11.6 mg),  $\text{Na}_2\text{CO}_3$  (1.4 mmol, 148.4mg), toluene (0.8 mL),  $\text{H}_2\text{O}$  (0.8 mL) and ethanol (0.2 mL). The reaction vessel was purged with argon for three times and stirred at 110  $^{\circ}\text{C}$  for 18 h. After cooling to room temperature, the volatiles were removed under reduced pressure. The residue was purified by column chromatography on silica gel (petroleum ether/ethyl acetate = 100:1) to give **5a** as white solid; yield: 56.3 mg (73%), mp 177-179  $^{\circ}\text{C}$ .

$^1\text{H}$  NMR (400 MHz,  $\text{CDCl}_3$ , ppm)  $\delta$  8.75 (d,  $J = 7.8$  Hz, 2H), 8.38 (d,  $J = 8.3$  Hz, 2H), 8.31 (d,  $J = 7.8$  Hz, 2H), 8.06 (s, 1H), 7.80 (d,  $J = 8.3$  Hz, 2H), 7.69 (d,  $J = 7.4$  Hz, 2H), 7.59-7.48 (m, 8H), 7.41 (t,  $J = 7.3$  Hz, 1H).  $^{13}\text{C}$  NMR (100 MHz,  $\text{CDCl}_3$ , ppm)  $\delta$  164.7, 164.5, 164.3, 143.6, 140.3, 138.1, 137.5, 136.3, 130.8, 130.6, 128.9, 128.5, 128.5, 127.8, 127.7, 127.6, 127.3, 127.2, 110.1; HRMS (ESI):  $m/z$  calcd for  $\text{C}_{28}\text{H}_{21}\text{N}_2^+$   $[\text{M}+\text{H}]^+$  385.1699, found 385.1694.

#### 2,4-diphenyl-6-(4-(phenylethynyl)phenyl)pyrimidine (**5b**)

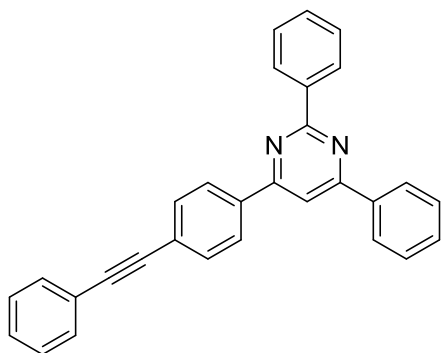

A 10 mL oven-dried reaction vessel was charged with 4-(4-bromophenyl)-2,6-diphenylpyrimidine (0.2 mmol, 77.2 mg), phenylacetylene (0.3 mmol, 33.0  $\mu$ L), PdCl<sub>2</sub> (0.01 mmol, 1.8 mg), CuI (0.01 mmol, 2.0 mg), PPh<sub>3</sub> (0.03 mmol, 7.9 mg) and Et<sub>3</sub>N (1.0 mL). The reaction vessel was purged with argon for three times and stirred at 80 °C for 12 h. After cooling to room temperature, the volatiles were removed under reduced pressure. The residue was purified by column chromatography on silica gel (petroleum ether/ethyl acetate = 50:1) to give **5b** as white solid; yield: 77.0 mg (94%), mp 162-164 °C.

<sup>1</sup>H NMR (400 MHz, CDCl<sub>3</sub>, ppm)  $\delta$  8.73 (d, *J* = 7.9 Hz, 2H), 8.31 (d, *J* = 8.2 Hz, 4H), 8.03 (s, 1H), 7.72 (d, *J* = 8.2 Hz, 2H), 7.63-7.49 (m, 8H), 7.43-7.30 (m, 3H). <sup>13</sup>C NMR (100 MHz, CDCl<sub>3</sub>, ppm)  $\delta$  164.8, 164.5, 163.7, 138.0, 137.4, 137.0, 132.0, 131.7, 130.8, 130.7, 128.9, 128.5, 128.4, 128.4, 127.3, 127.1, 125.7, 122.9, 110.1, 91.5, 89.1 HRMS (ESI): *m/z* calcd for C<sub>30</sub>H<sub>21</sub>N<sub>2</sub><sup>+</sup> [M+H]<sup>+</sup> 409.1699, found 409.1695.

#### 9-(4-(2,6-diphenylpyrimidin-4-yl)phenyl)-9H-carbazole (**5c**)

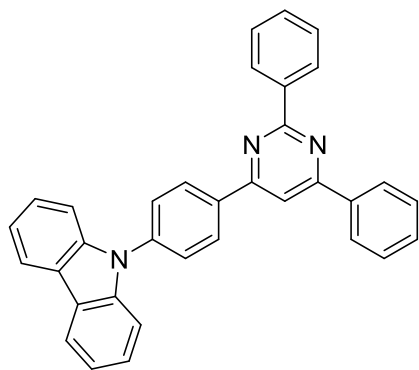

A 10 mL oven-dried reaction vessel was charged with 4-(4-bromophenyl)-2,6-diphenylpyrimidine (0.2 mmol, 77.2 mg), carbazole (0.3 mmol, 50.2 mg), Pd(OAc)<sub>2</sub> (0.02 mmol, 4.6 mg), P(*t*-Bu)<sub>3</sub>HBF<sub>4</sub> (0.04 mmol, 11.6 mg), K<sub>2</sub>CO<sub>3</sub> (0.6 mmol, 83 mg) and *o*-xylene (0.8 mL). The reaction vessel was purged with argon for three times and stirred at 140 °C for 16 h. After cooling to room temperature, the volatiles were removed under reduced pressure. The residue was purified by column chromatography on silica gel (petroleum ether/ethyl acetate = 50:1) to give **5c** as white solid; yield: 81.4 mg (86%), mp 214-217 °C.

<sup>1</sup>H NMR (400 MHz, CDCl<sub>3</sub>, ppm)  $\delta$  8.78 (d, *J* = 8.0 Hz, 2H), 8.55 (d, *J* = 8.4 Hz, 2H), 8.35 (d, *J* = 7.9 Hz, 2H), 8.18 (d, *J* = 7.7 Hz, 2H), 8.12 (s, 1H), 7.80 (d, *J* = 8.4 Hz, 2H), 7.62-7.52 (m, 8H), 7.46 (t, *J* = 7.6 Hz, 2H), 7.33 (t, *J* = 7.4 Hz, 2H). <sup>13</sup>C NMR (100 MHz, CDCl<sub>3</sub>, ppm)  $\delta$  165.0, 164.7, 163.9, 140.5, 140.1, 138.0, 137.4, 136.4, 130.9, 130.8, 129.0, 128.9, 128.5, 128.5, 127.3, 127.2, 126.1, 123.7, 120.4, 120.3, 110.3, 109.8; HRMS (ESI): *m/z* calcd for C<sub>34</sub>H<sub>24</sub>N<sub>3</sub><sup>+</sup> [M+H]<sup>+</sup> 474.1965, found 474.1956.

**10-(4-(2,6-diphenylpyrimidin-4-yl)phenyl)-10H-phenothiazine (5d)**

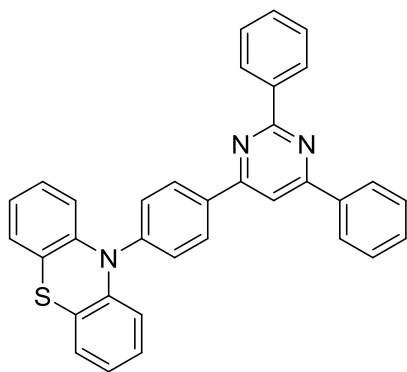

A 10 mL oven-dried reaction vessel was charged with 4-(4-bromophenyl)-2,6-diphenylpyrimidine (0.2 mmol, 77.2 mg), phenothiazine (0.2 mmol, 39.8 mg), Pd<sub>2</sub>(dba)<sub>3</sub> (0.004 mmol, 3.6 mg), P(*t*-Bu)<sub>3</sub>HBF<sub>4</sub> (0.012 mmol, 3.4 mg), *t*-BuOK (0.26 mmol, 29.2 mg) and toluene (2.0 mL). The reaction vessel was purged with argon for three times and stirred at 110 °C for 10 h. After cooling to room temperature, the volatiles were removed under reduced pressure. The residue was purified by column chromatography on silica gel (petroleum ether/ethyl acetate = 50:1) to give **5d** as yellow solid; yield: 90.2 mg (89%), mp 216-219 °C

<sup>1</sup>H NMR (400 MHz, DMSO-*d*<sub>6</sub>, ppm) δ 8.73-8.64 (m, 4H), 8.60 (s, 1H), 8.52 (dd, *J* = 6.6, 2.9 Hz, 2H), 7.64-7.60 (m, 6H), 7.56 (d, *J* = 8.5 Hz, 2H), 7.23 (d, *J* = 7.6 Hz, 2H), 7.08 (t, *J* = 7.7 Hz, 2H), 6.99 (t, *J* = 7.4 Hz, 2H), 6.57 (d, *J* = 8.2 Hz, 2H). <sup>13</sup>C NMR (100 MHz, DMSO-*d*<sub>6</sub>, ppm) δ 164.4, 163.5, 163.5, 144.1, 142.9, 137.5, 136.6, 135.0, 131.3, 131.1, 130.0, 129.1, 128.8, 128.1, 127.6, 127.5, 127.5, 127.3, 123.8, 122.5, 118.6, 110.6; HRMS (ESI): *m/z* calcd for C<sub>34</sub>H<sub>24</sub>N<sub>3</sub>S<sup>+</sup> [M+H]<sup>+</sup> 506.1685, found 506.1678.

## 5. References

- [1] L. B. Su, K. Sun, N. Pan, L. Liu, M. L. Sun, J. Y. Dong, Y. B. Zhou and S. F. Yin, *Org. Lett.*, 2018, **20**, 3399.
- [2] D. Q. Liu, W. Guo, W. Q. Wu and H. F. Jiang, *J. Org. Chem.*, 2017, **82**, 13609.
- [3] K. S. Vadagaonkar, H. P. Kalmode, S. Prakash, A. C. Chaskar, *New J. Chem.*, 2015, **39**, 3639.
- [4] M. K. Gupta, A. K. Gupta, V. Gupta and K. C. Gupta, *J. Indian Chem. Soc.*, 2007, **84**, 299.
- [5] T. C. Shi, F. Qin, Q. Li and W. Zhang, *Org. Biomol. Chem.*, 2018, **16**, 9487.
- [6] M. Mastalir, M. Glatz, E. Pittenauer, G. Allmaier and K. Kirchner, *J. Am. Chem. Soc.*, 2016, **138**, 15543.
- [7] X. Zhang, Z. Q. Wang, K. Xu, Y. Q. Feng, W. Zhao, X. F. Xu, Y. L. Yan and W. Yi, *Green Chem.*, 2016, *18*, 2313.
- [8] R. S. Rohokale, B. Koenig and D. D. Dhavale, *J. Org. Chem.*, 2016, **81**, 7121.
- [9] A. A. Buelte, N. C. Osti, Y. Htet, C. A. Conrad, M. F. Shehata, R. Potai, A. G. Tennyson, D. Perahia and R. C. Smith, *J. Mater. Chem. C*, 2014, **2**, 8113.
- [10] S. J. Tu, T. J. Li, F. Shi, Q. Wang, J. P. Zhang, J. N. Xu, X. T. Zhu, X. J. Zhang, S. L. Zhu and D. Q. Shi, *Synthesis*, 2005, **18**, 3045.
- [11] Z. Y. Mao, X. Y. Liao, H. S. Wang, C. G. Wang, K. B. Huang and Y. M. Pan, *RSC Adv.*, 2017, **7**, 13123.
- [12] Y. K. Yi, M. N. Zhao, Z. H. Ren, Y. Y. Wang and Z. H. Guan, *Green Chem.*, 2017, **19**, 1023.
- [13] Y. J. Fu, P. P. Wang, X. Guo, P. Wu, X. Meng and B. H. Chen, *J. Org. Chem.*, 2016, **81**, 11671.

## 6. $^1\text{H}$ NMR and $^{13}\text{C}$ NMR spectra of all products

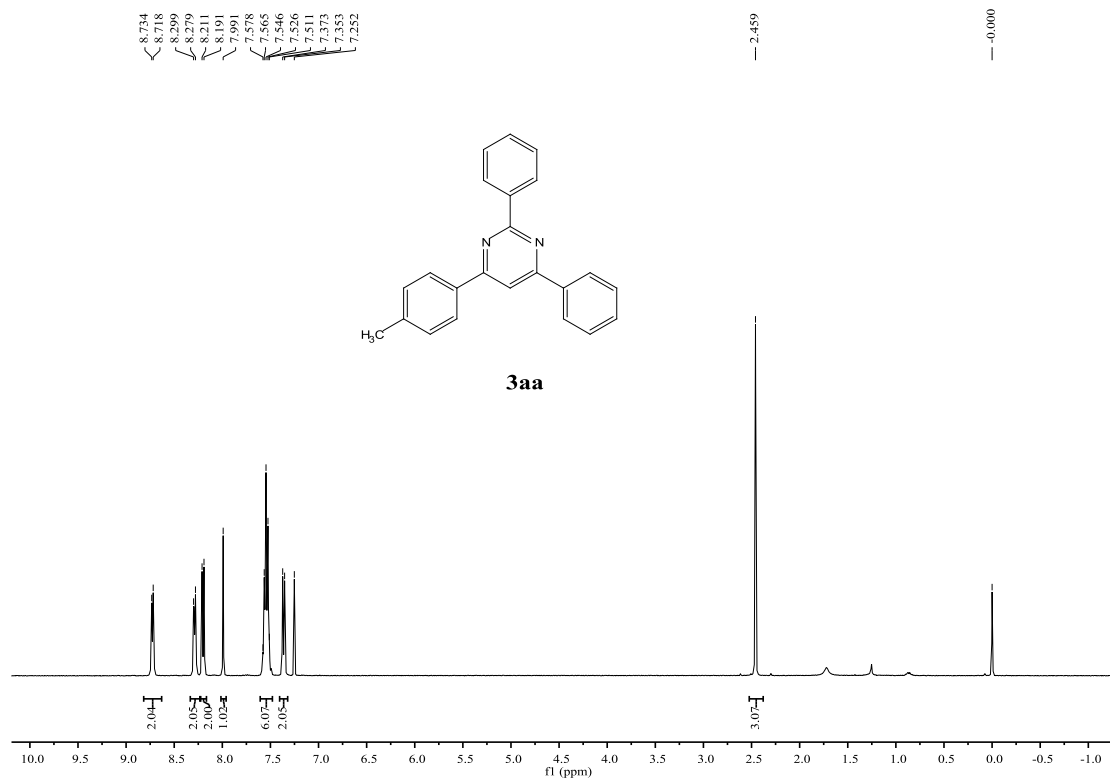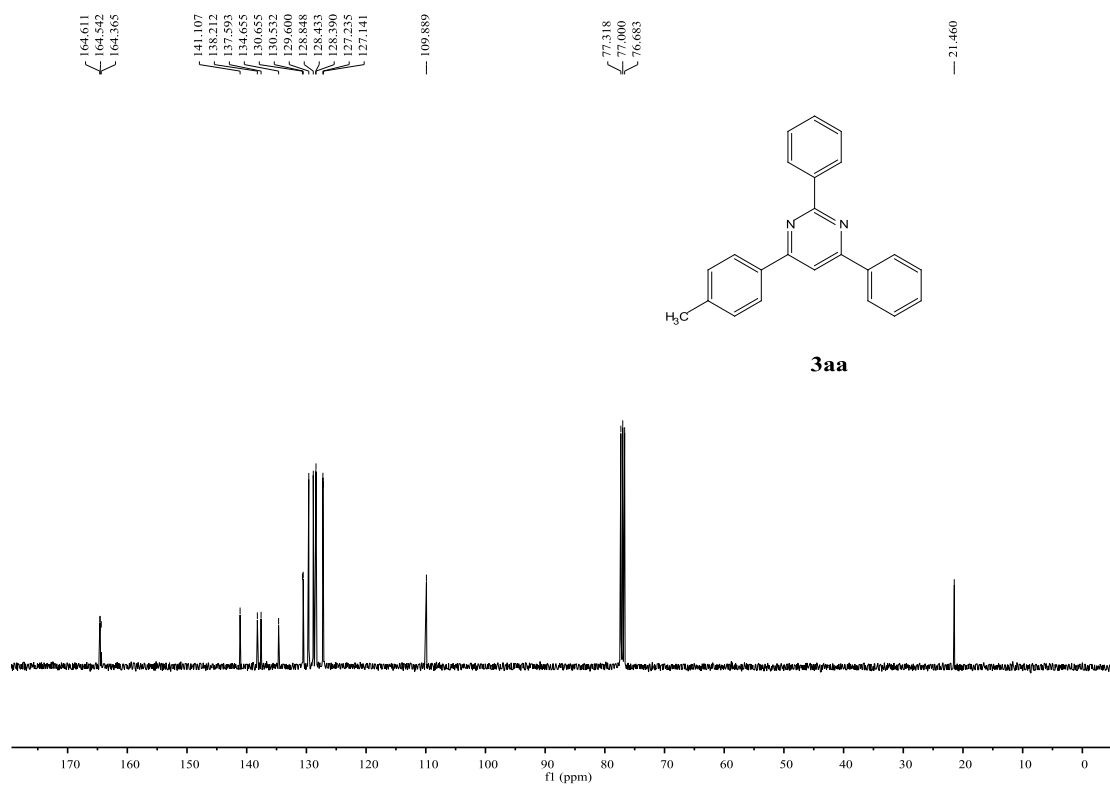

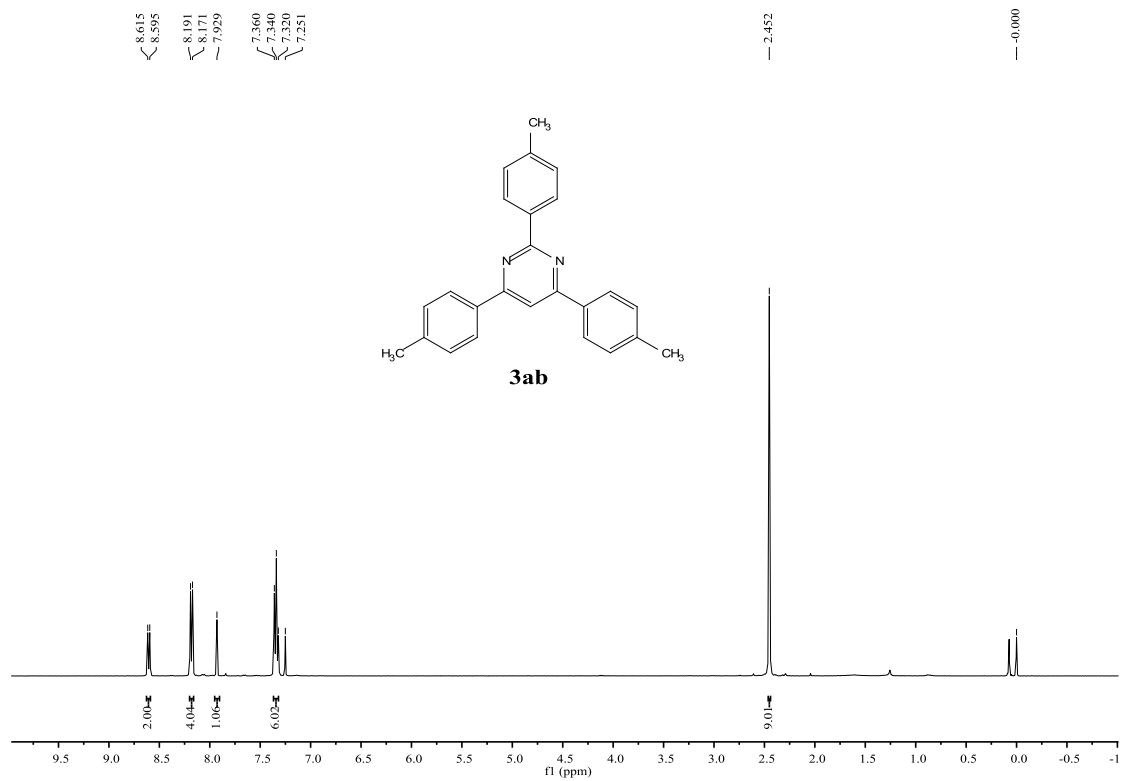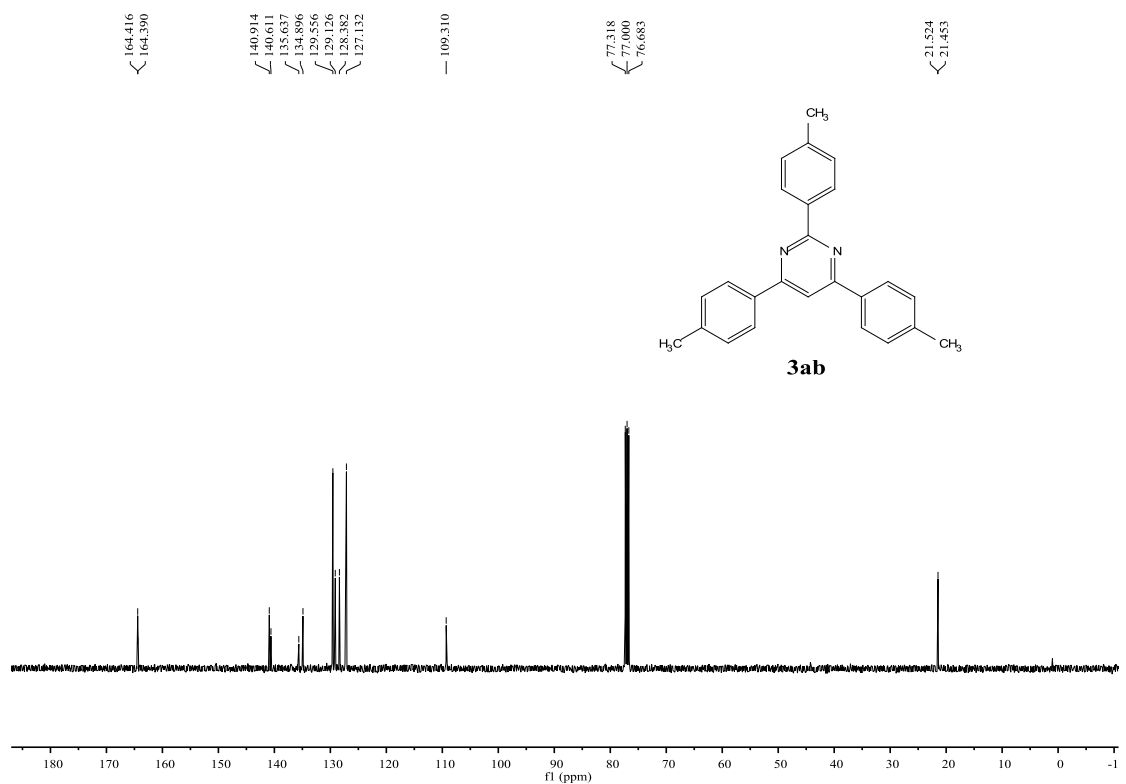

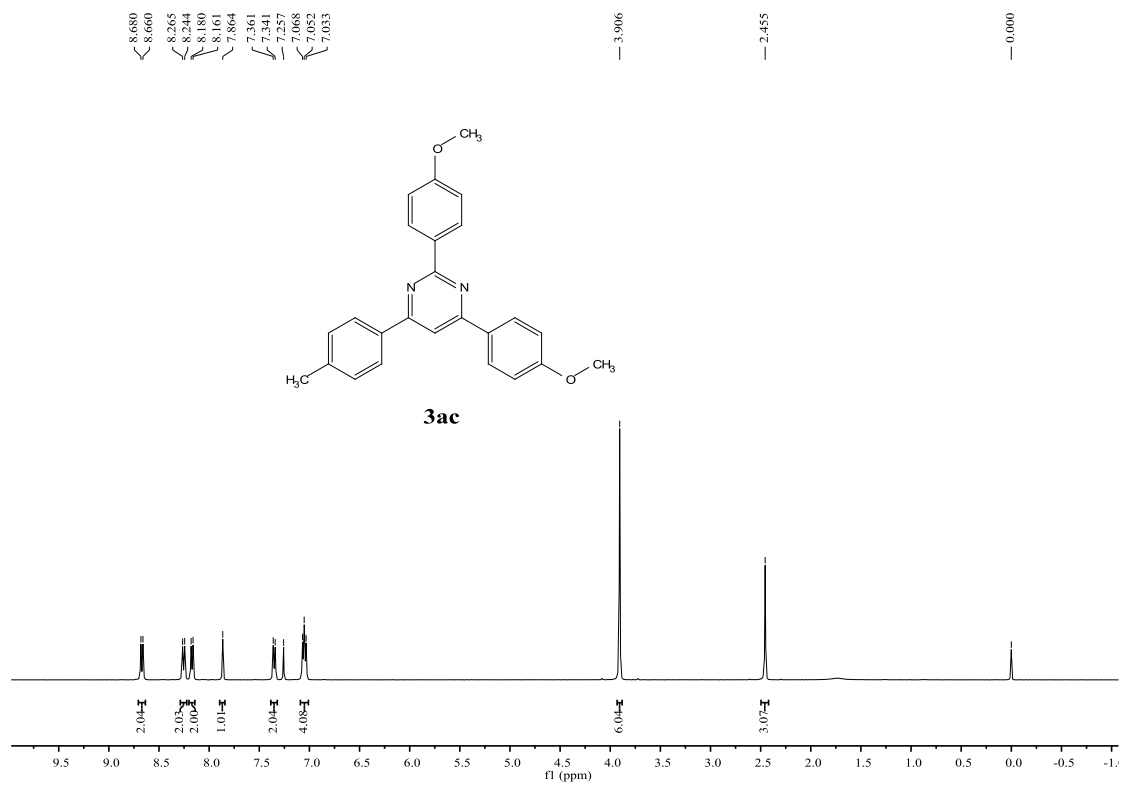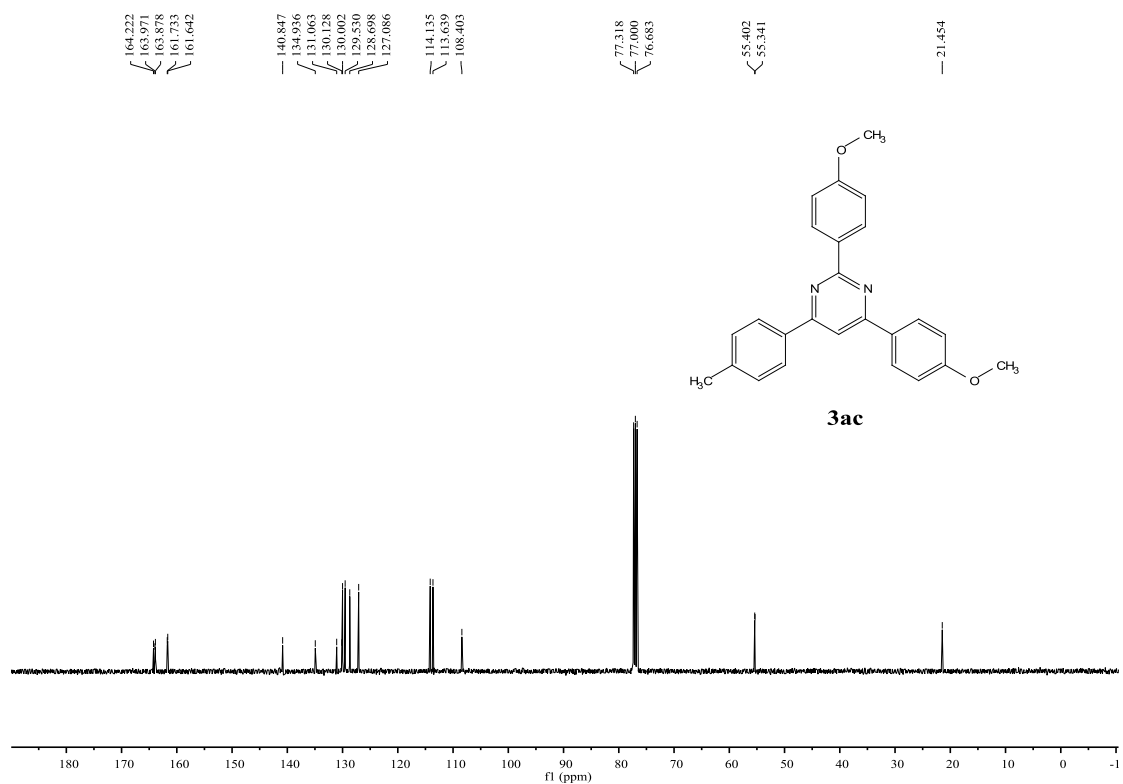

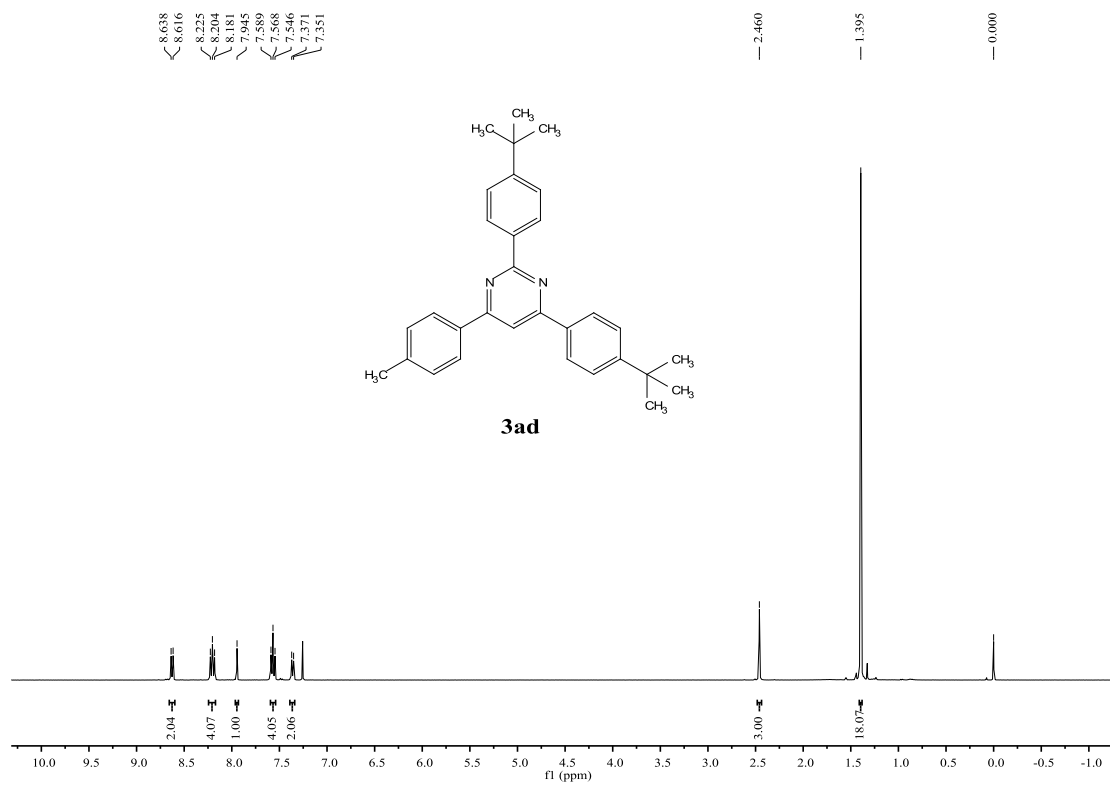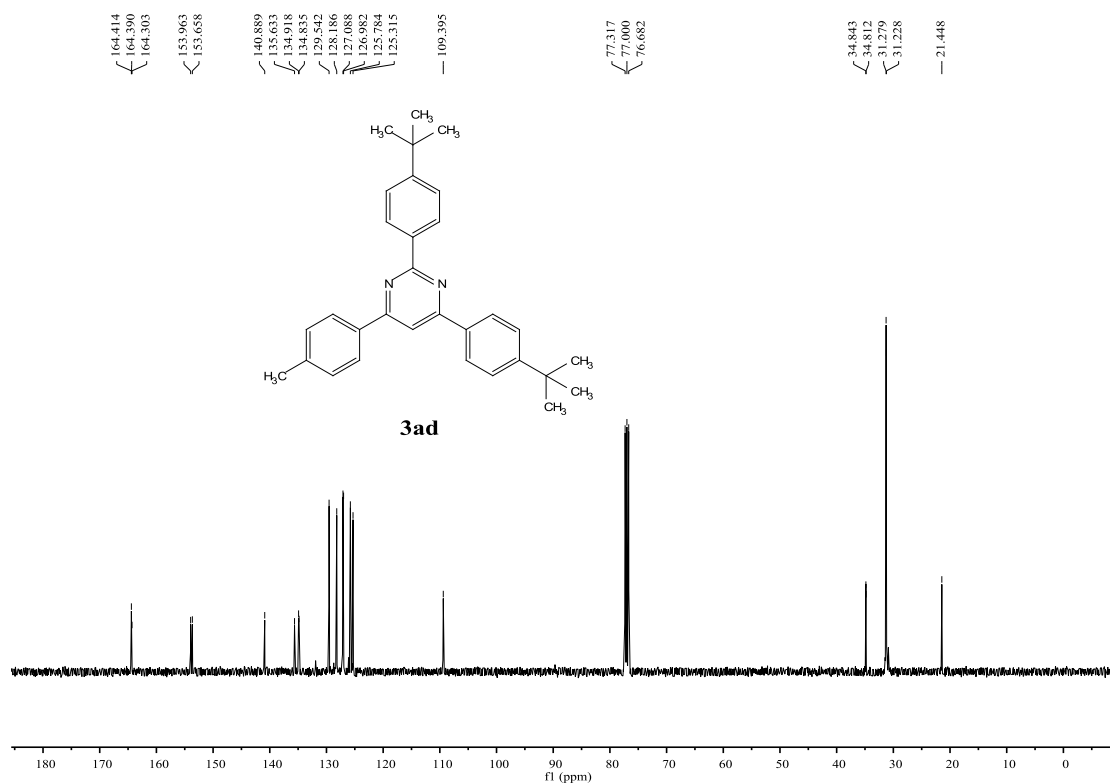



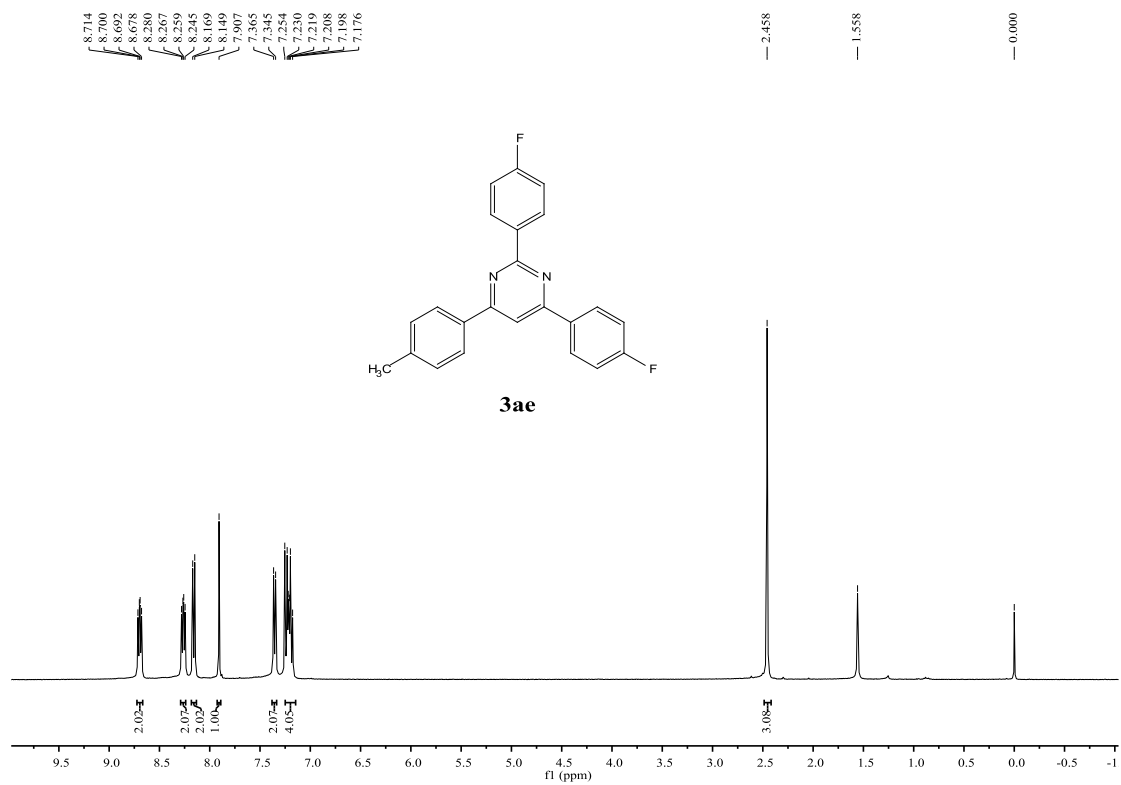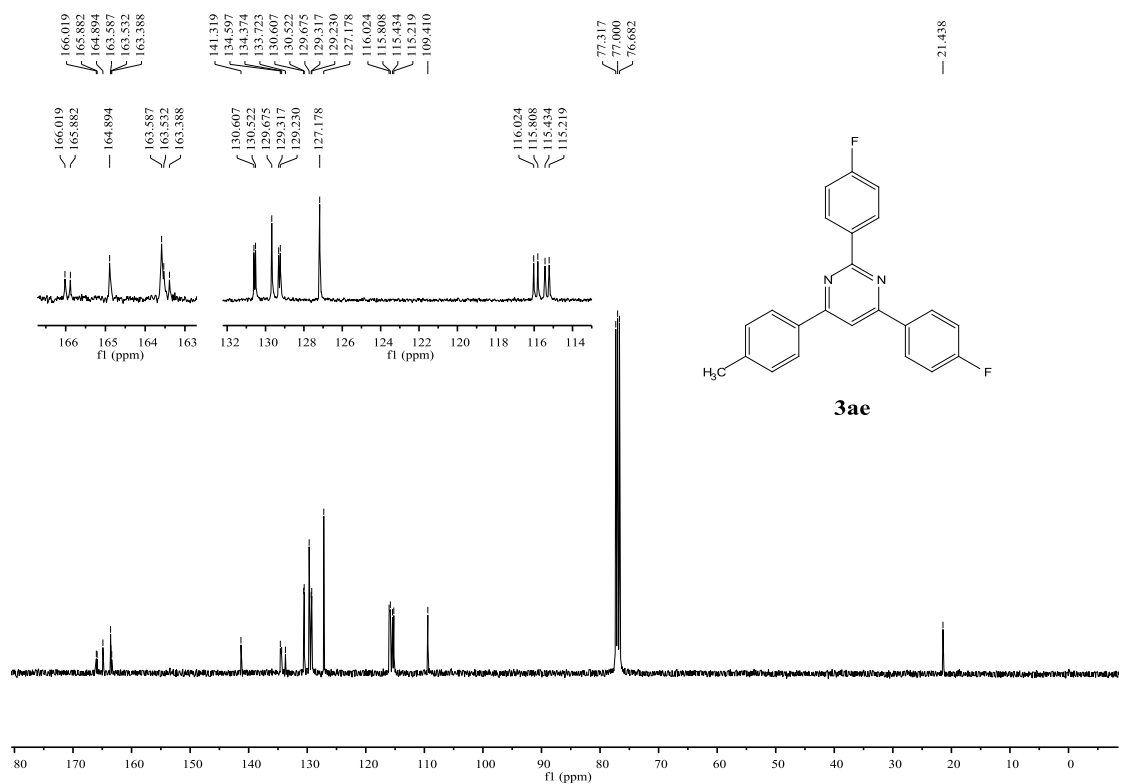

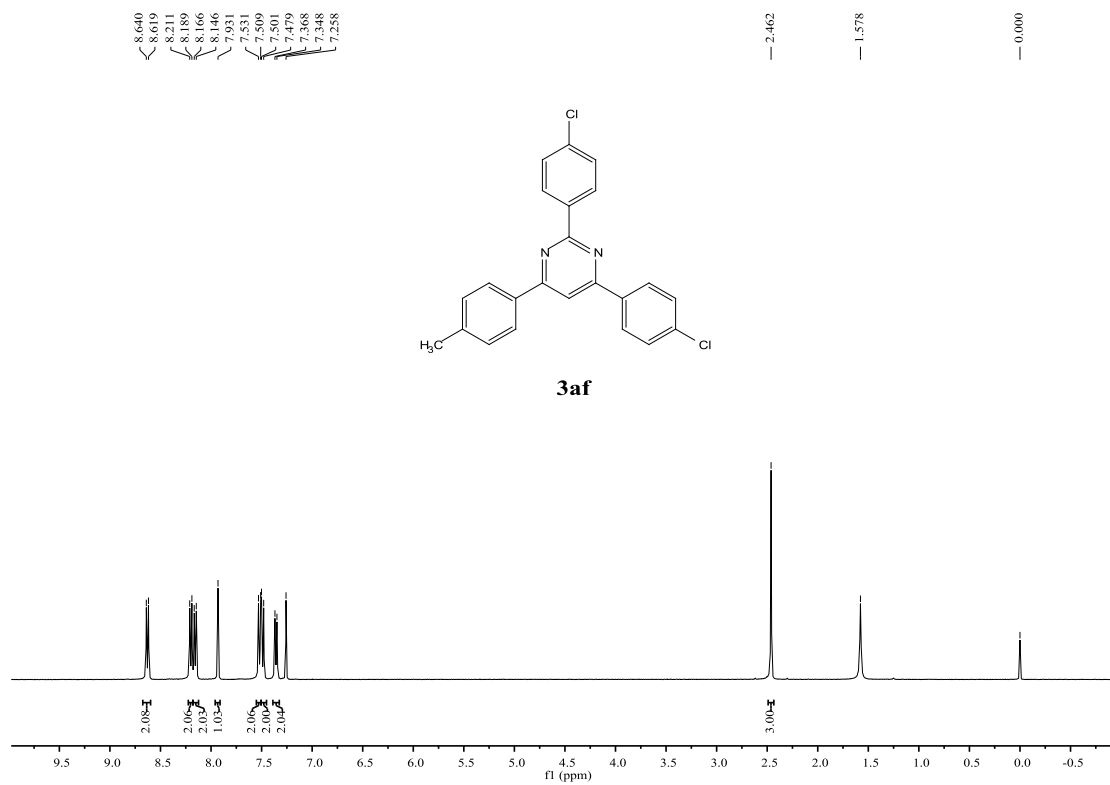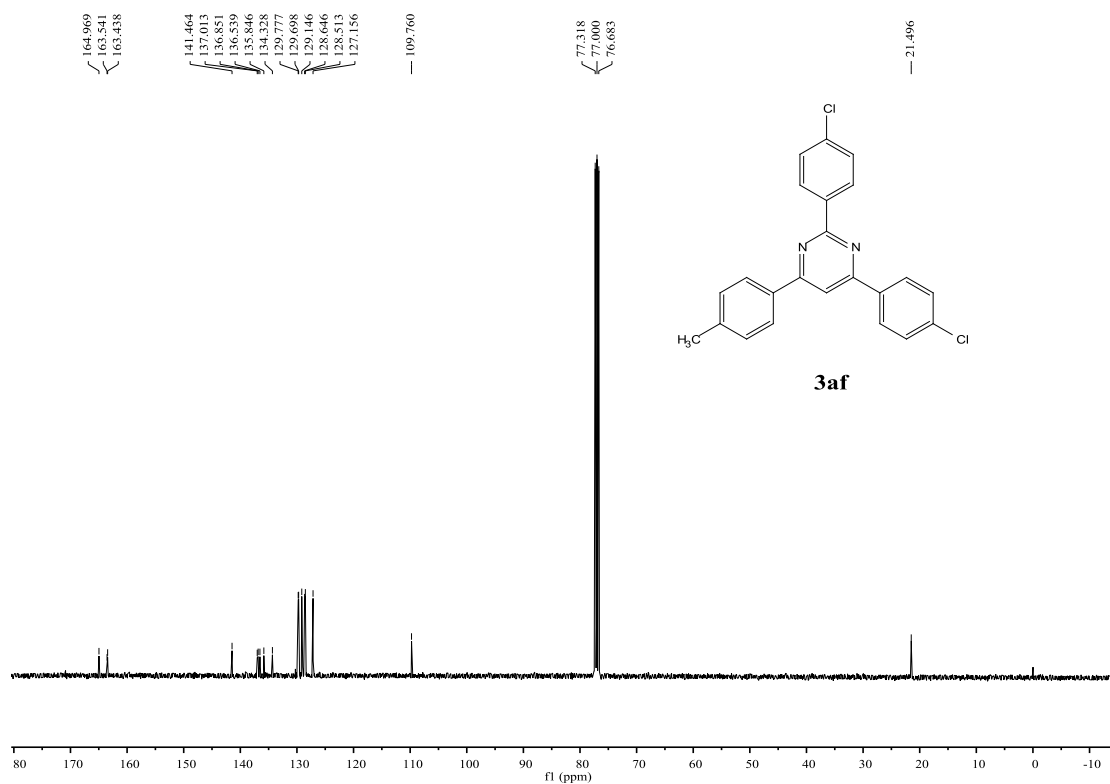

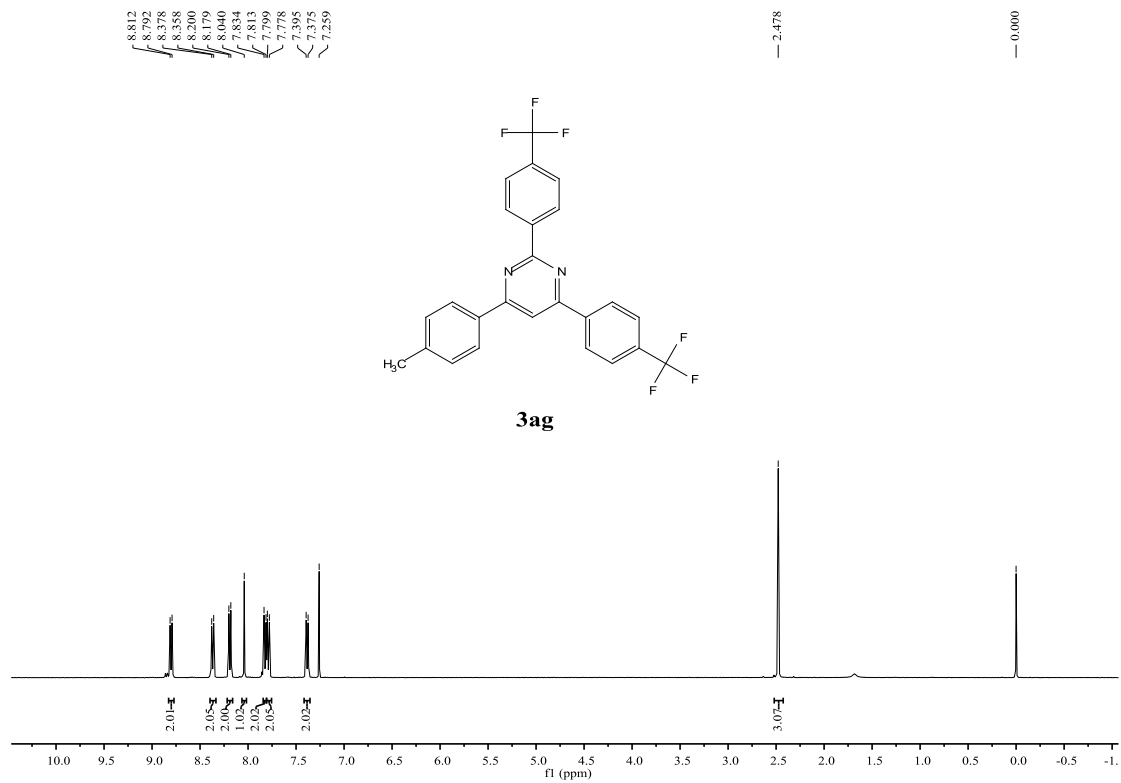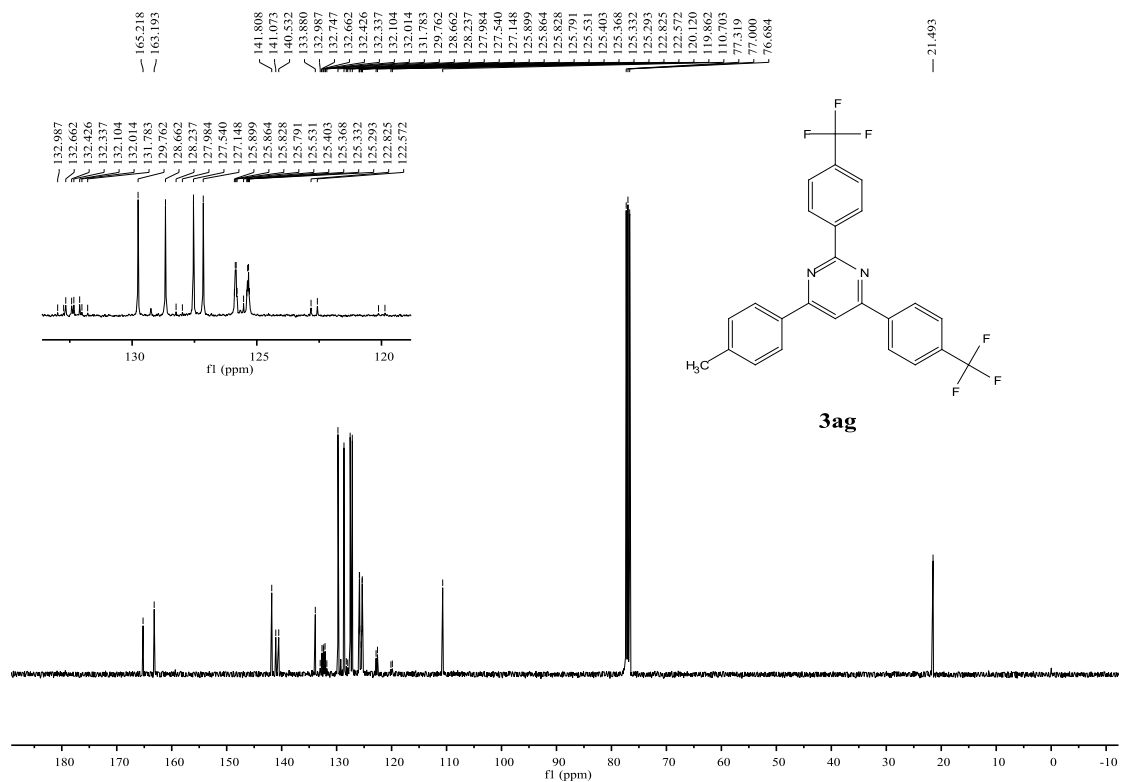

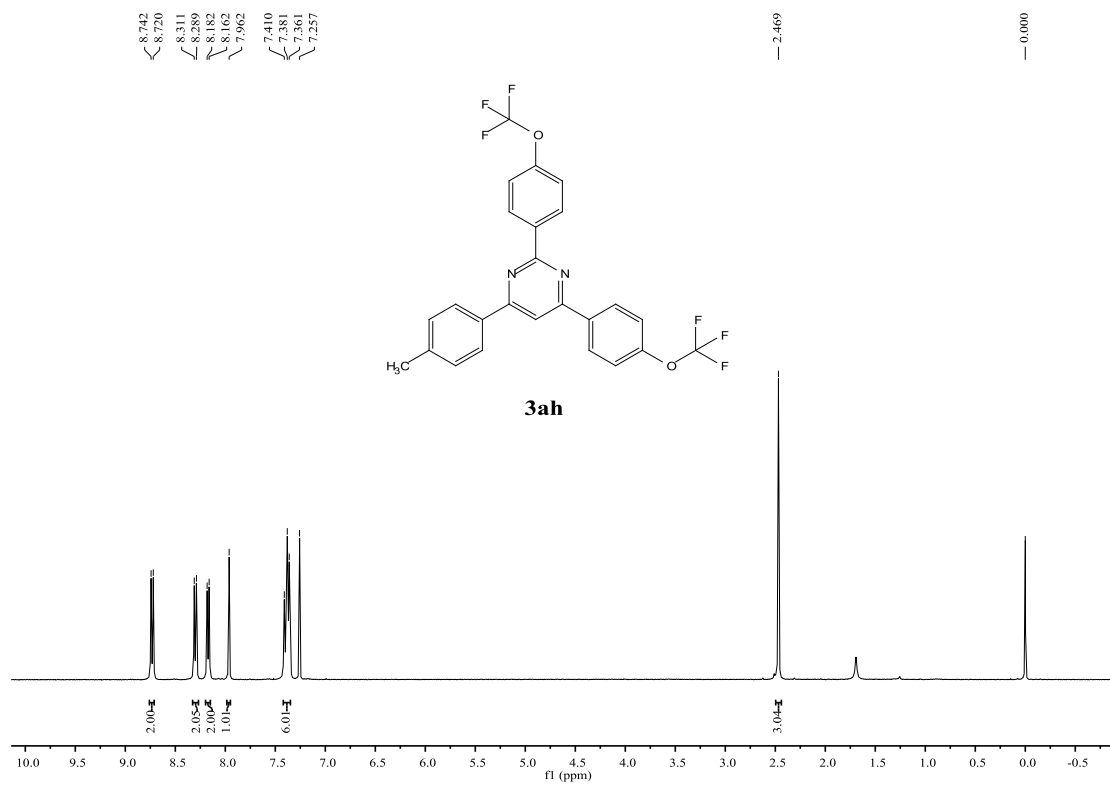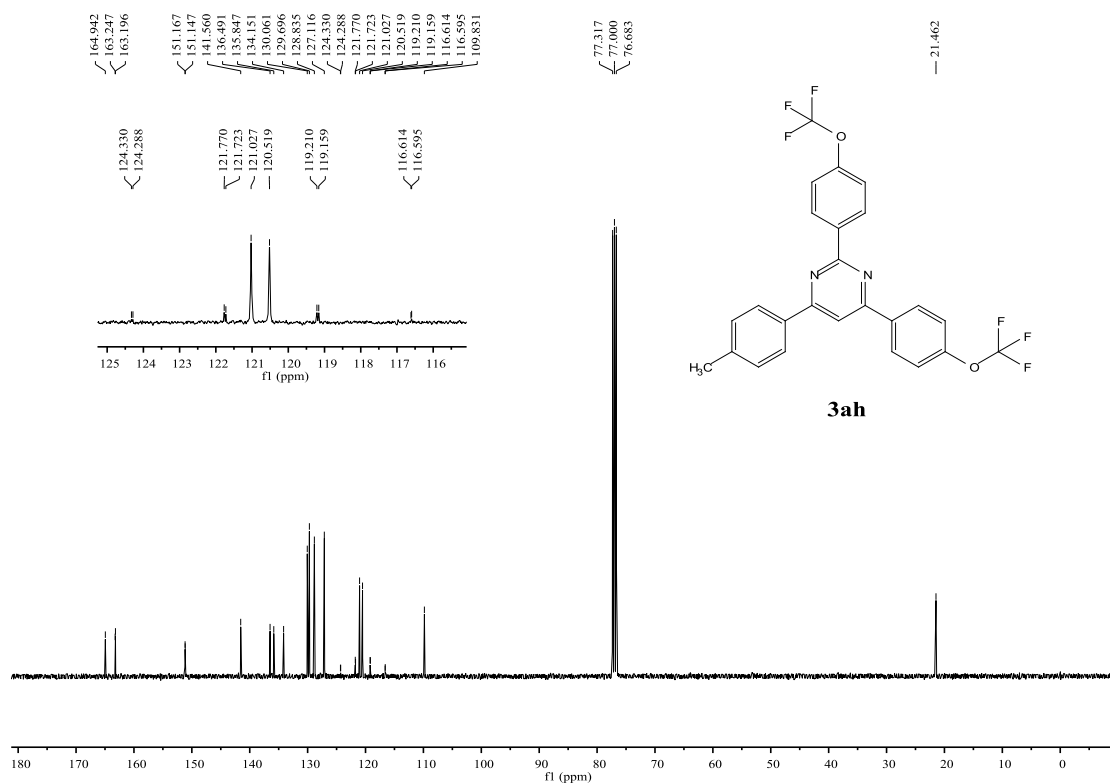

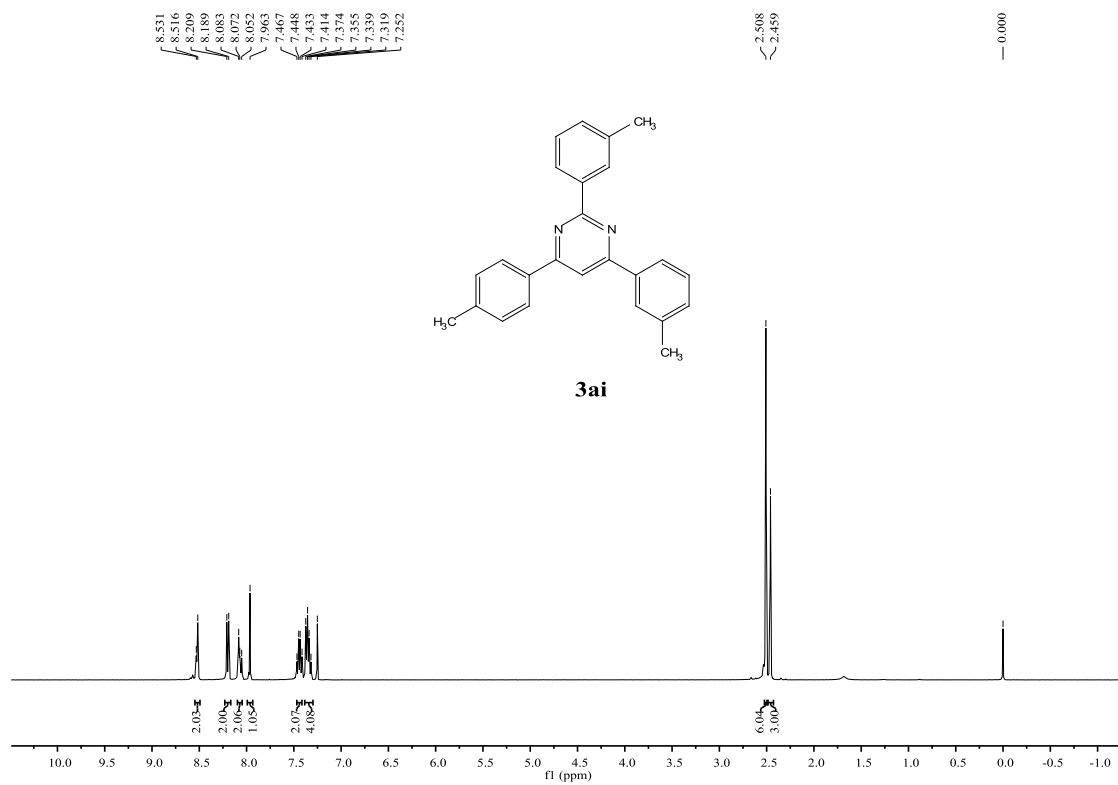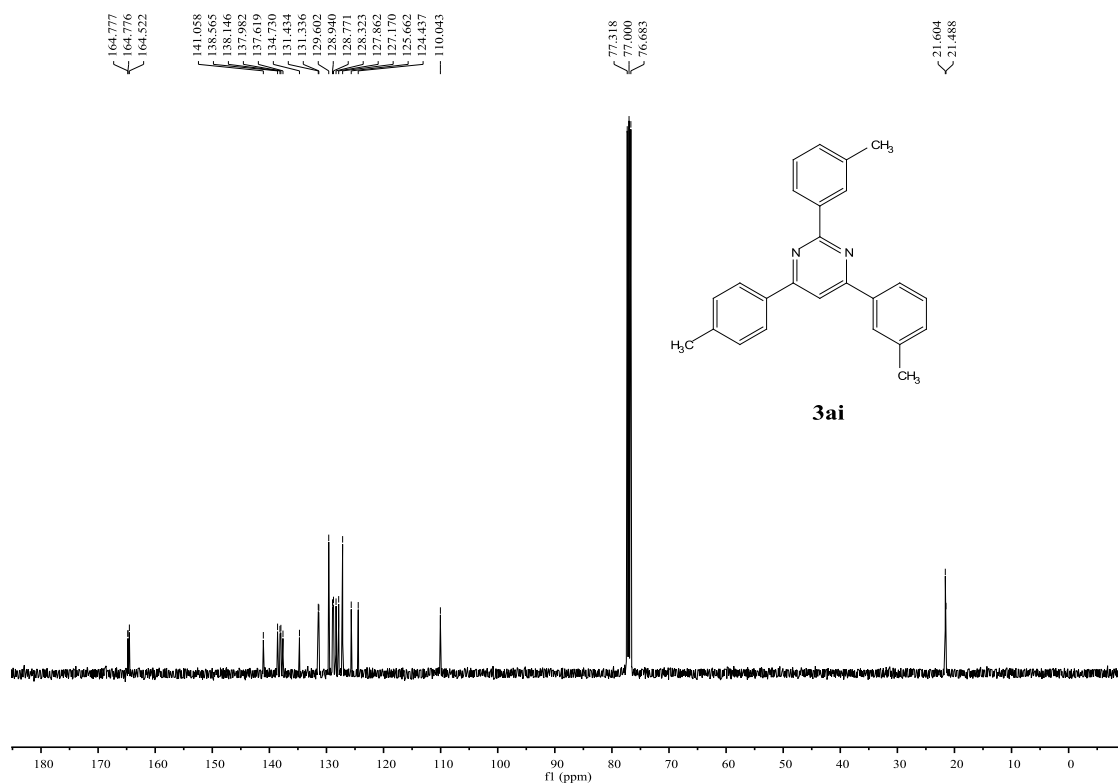

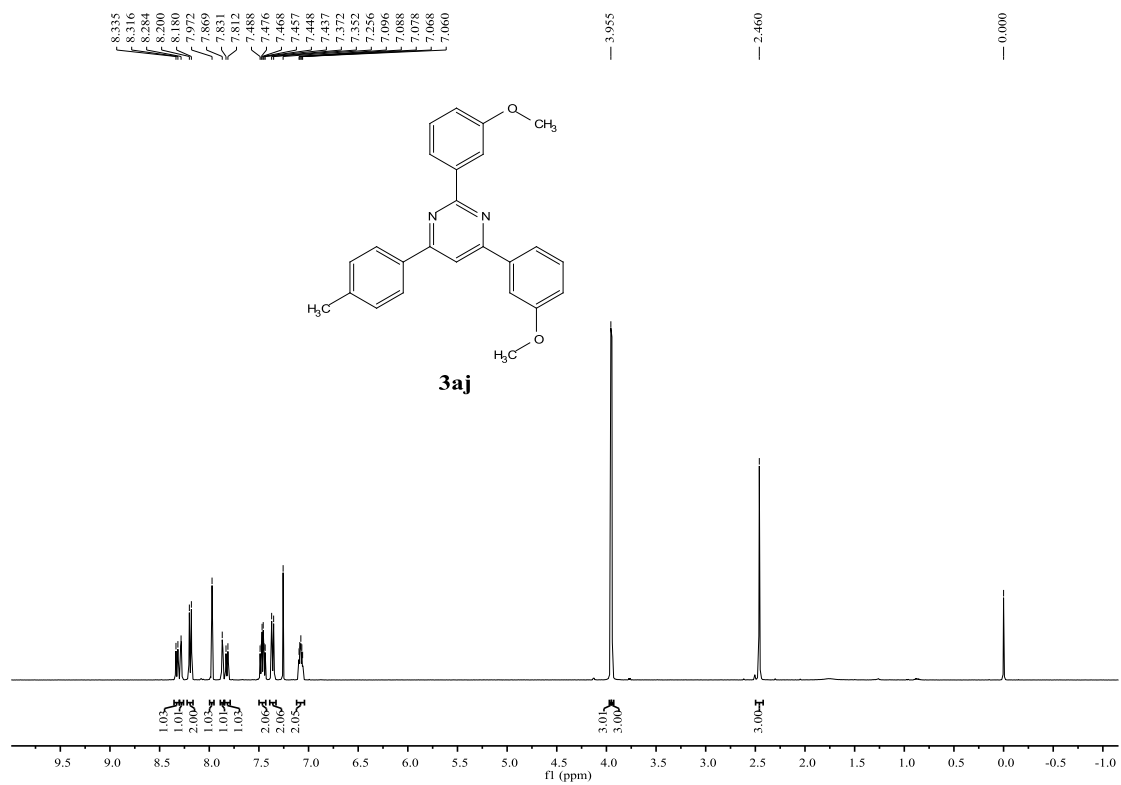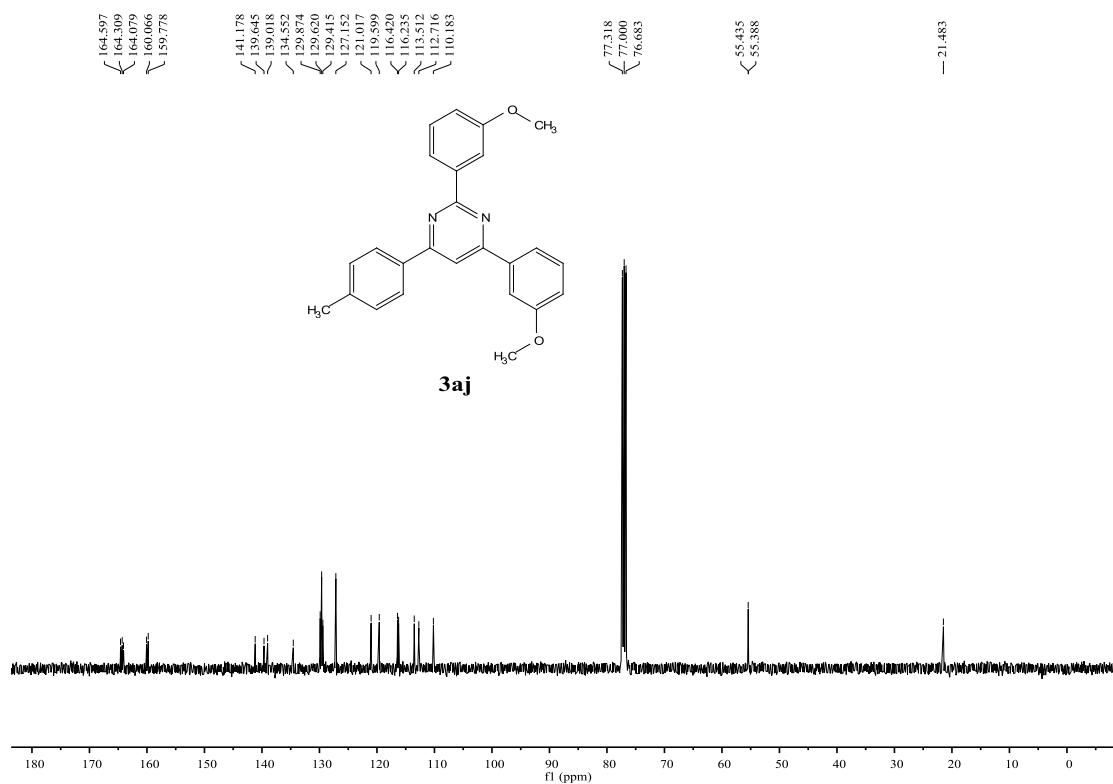

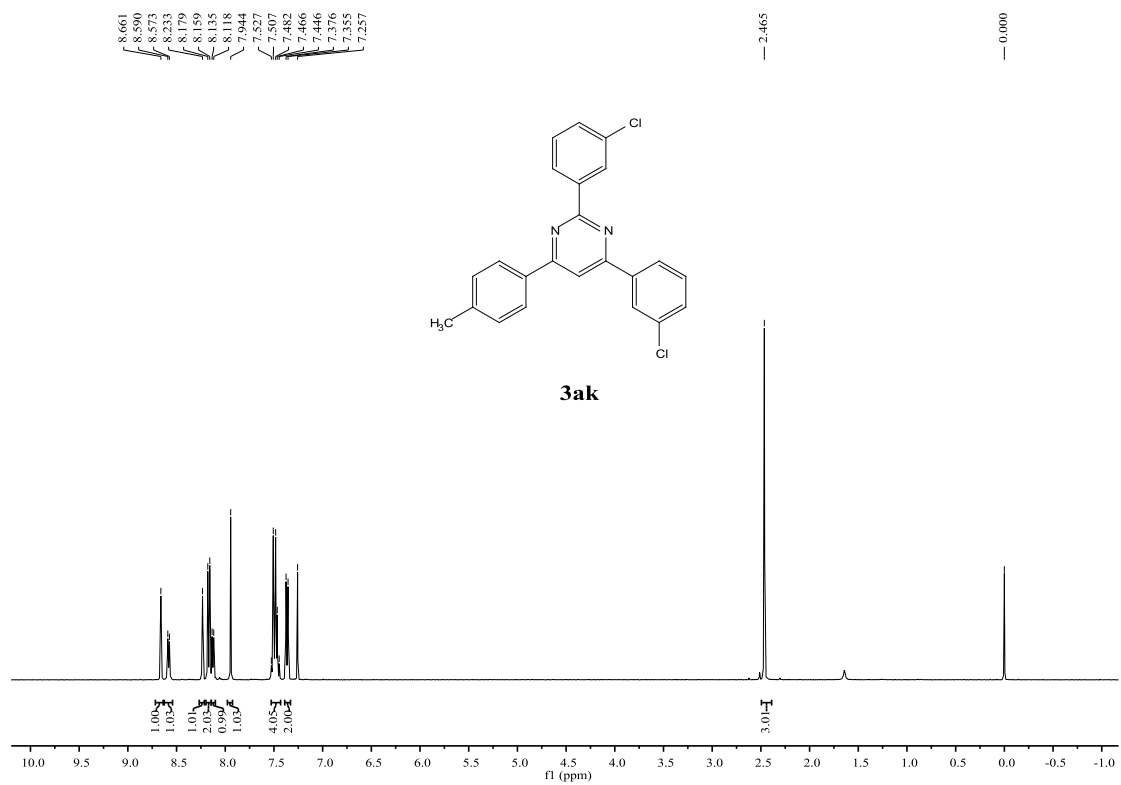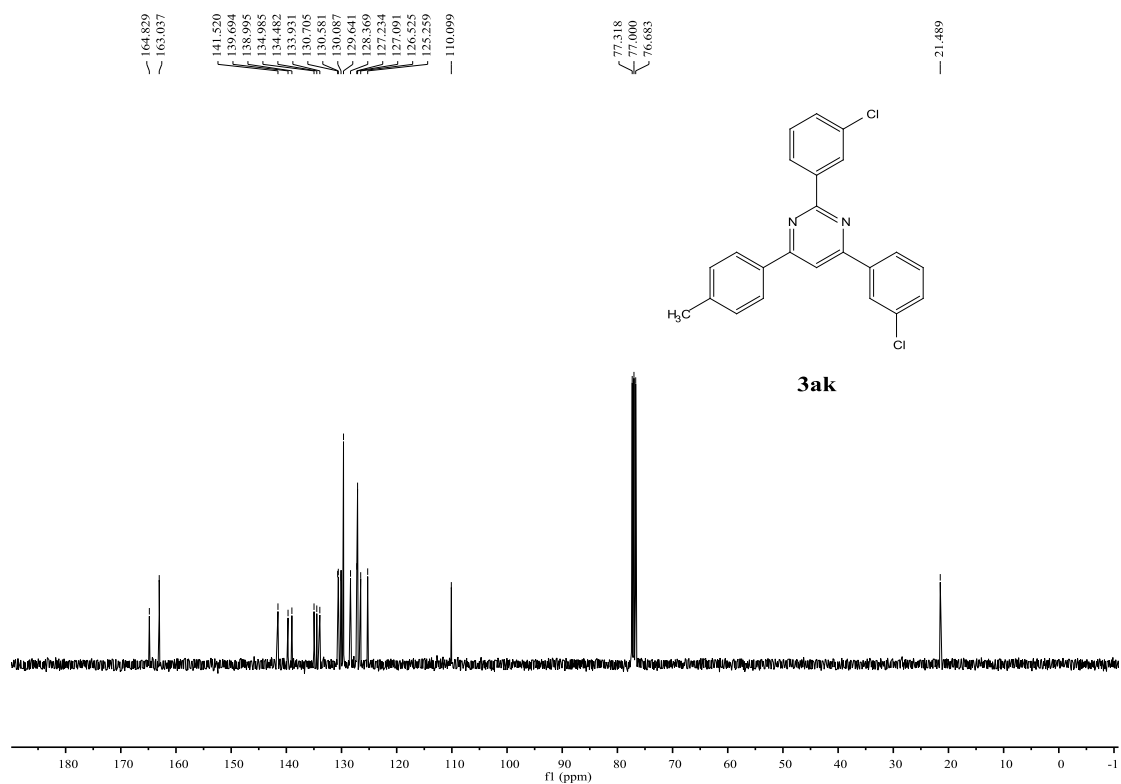

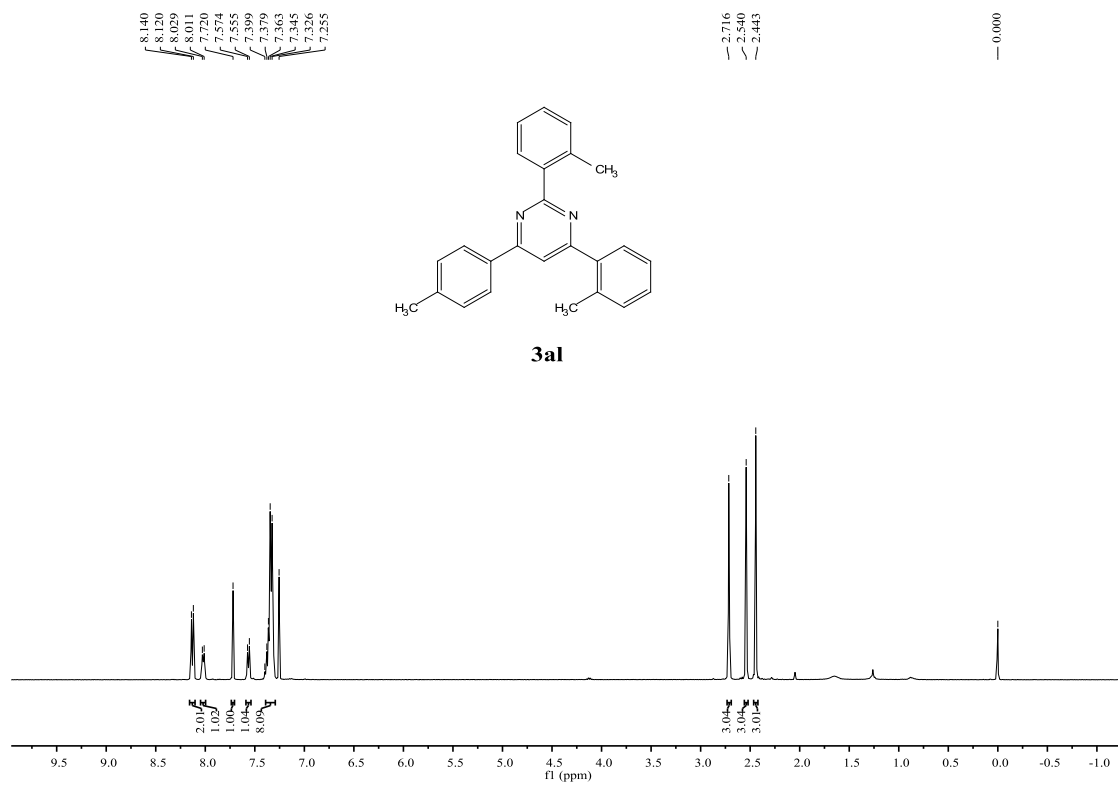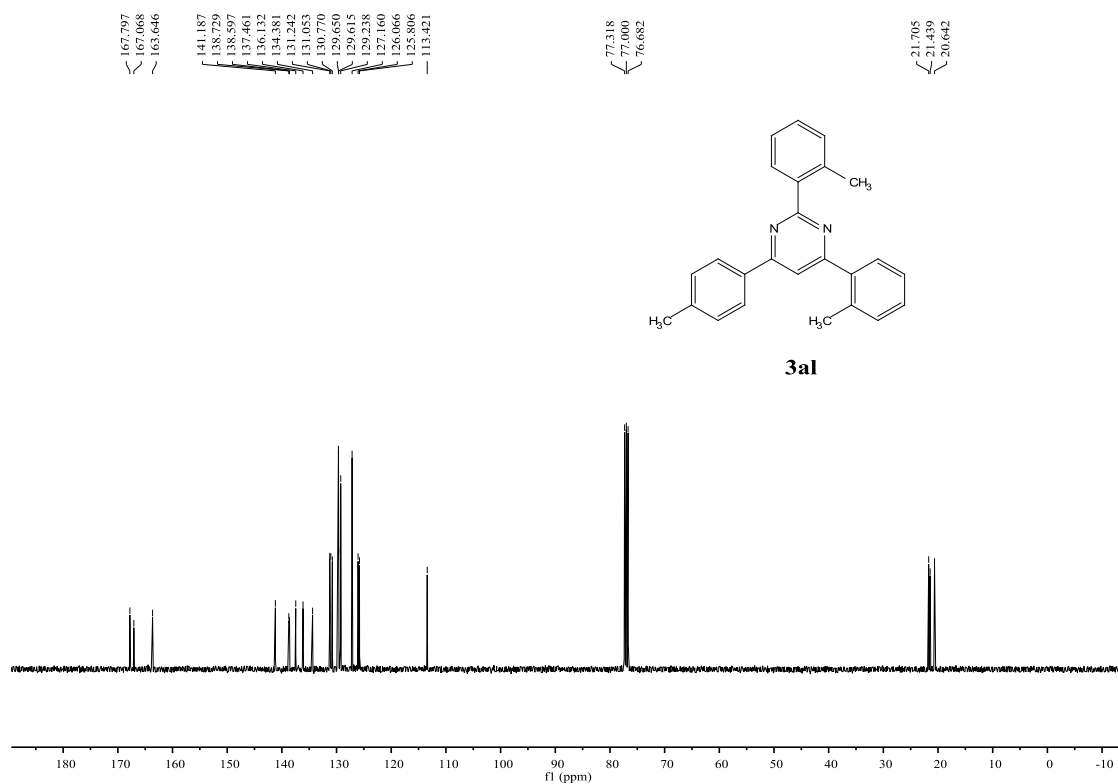



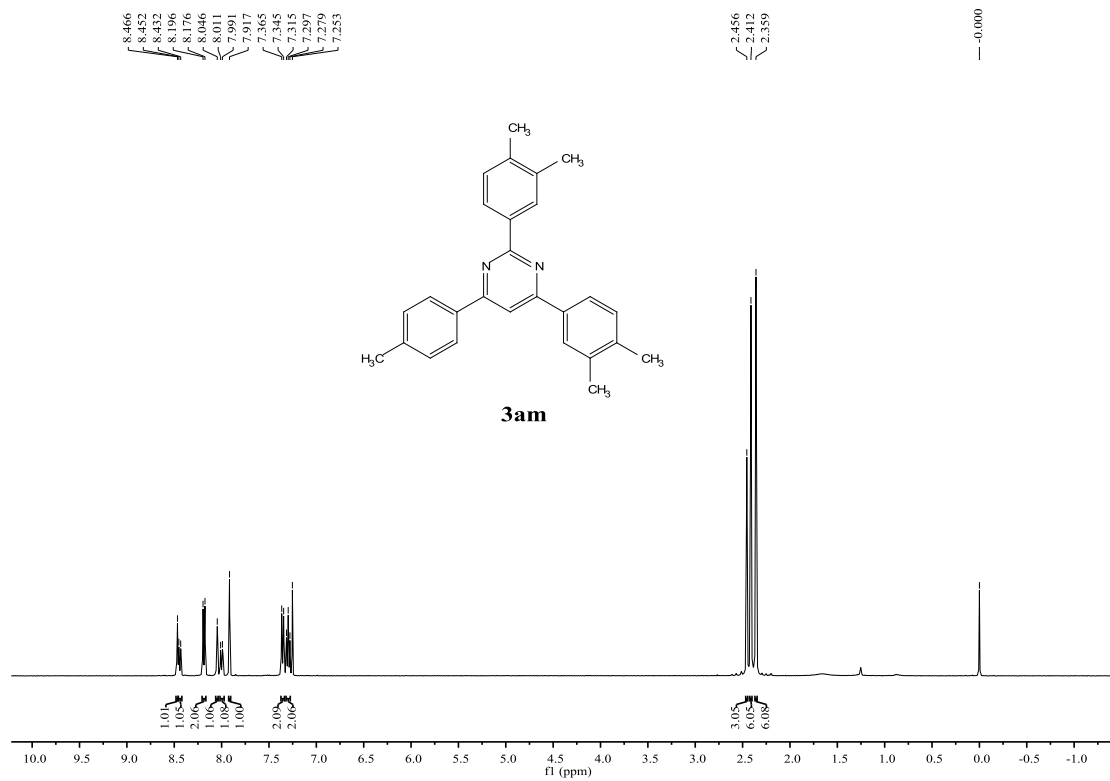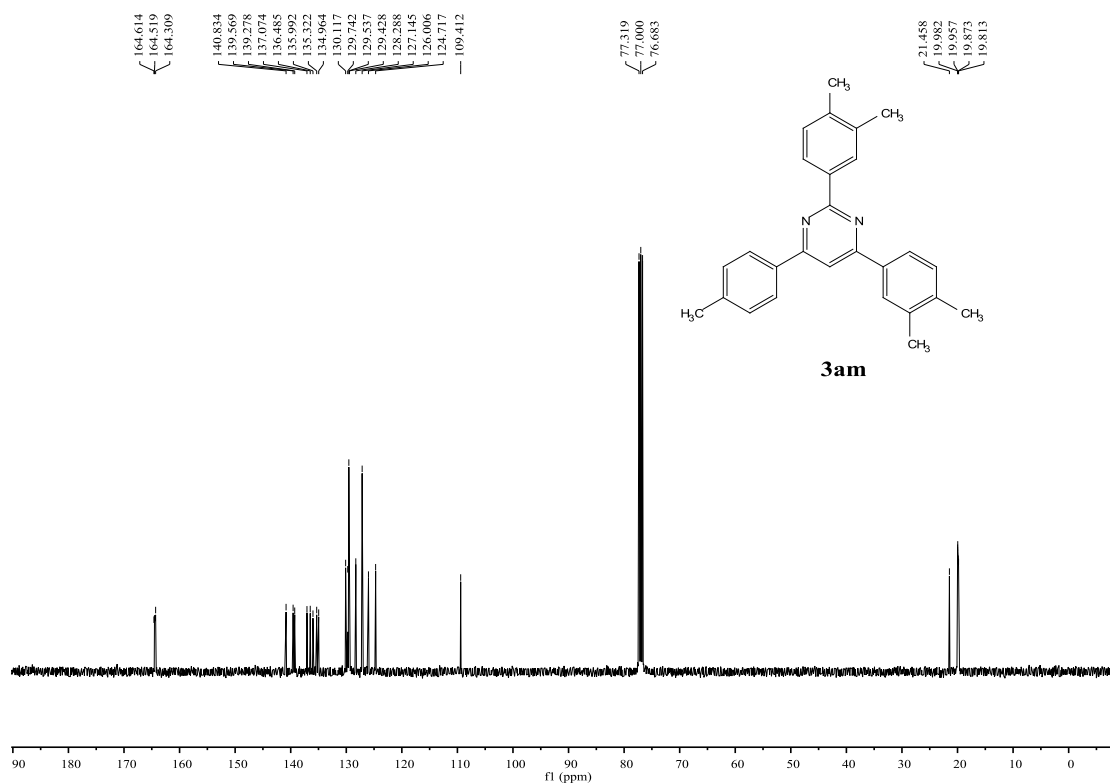

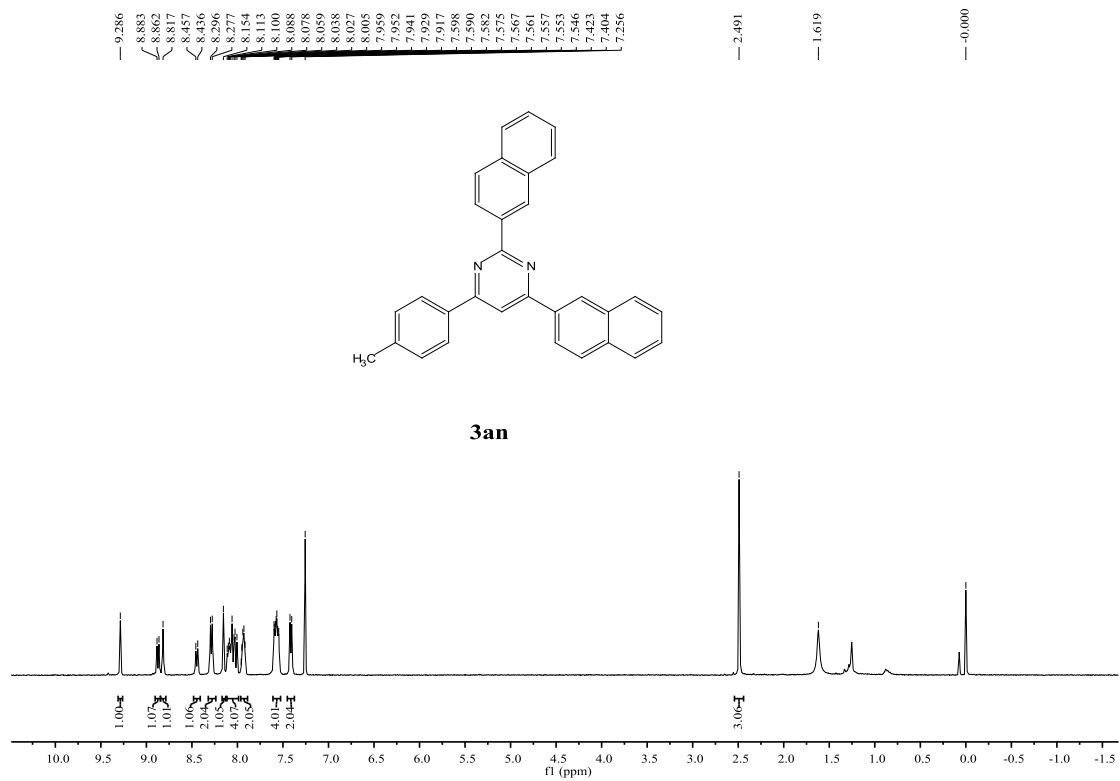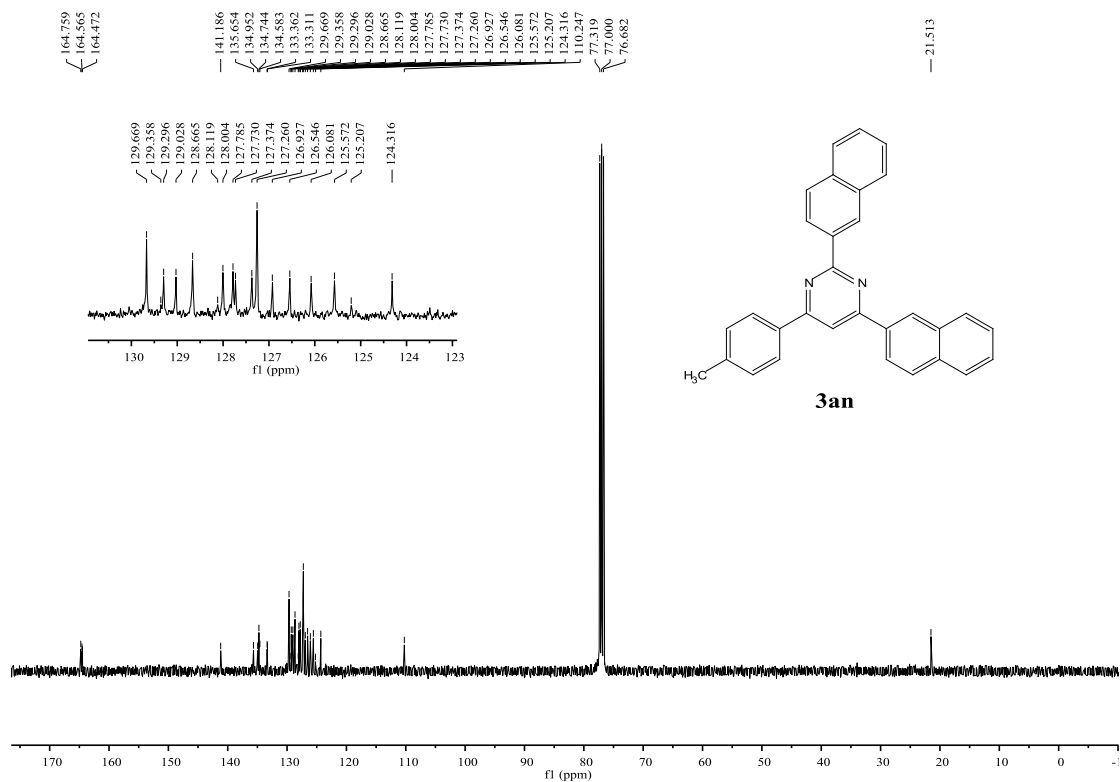

8.747  
8.730  
8.308  
8.291  
8.022  
7.573  
7.558  
7.539  
7.251

-0.000

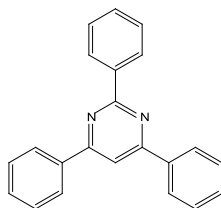

3ba

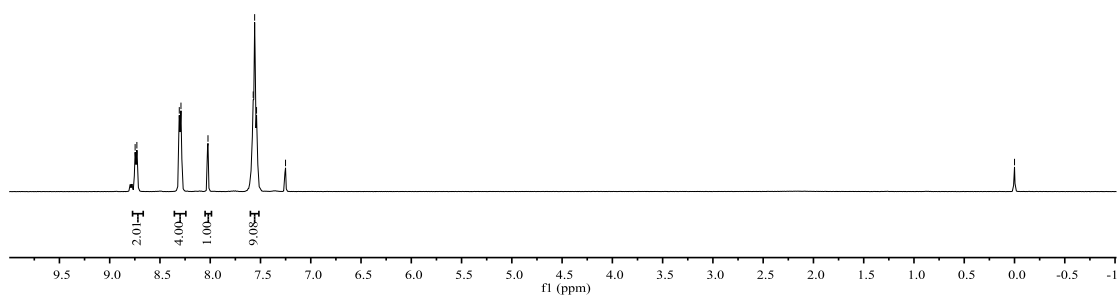

164.680  
164.417

138.055  
137.445  
136.738  
130.628  
128.917  
128.883  
128.430  
127.247  
110.266

77.318  
77.001  
76.684

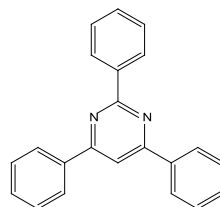

3ba

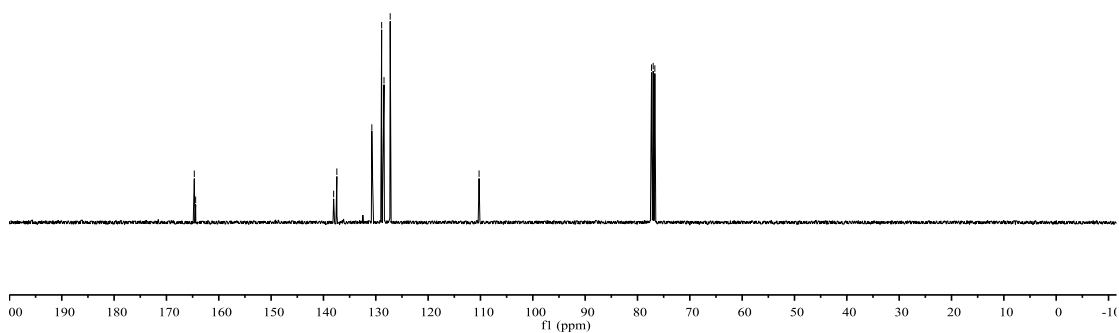

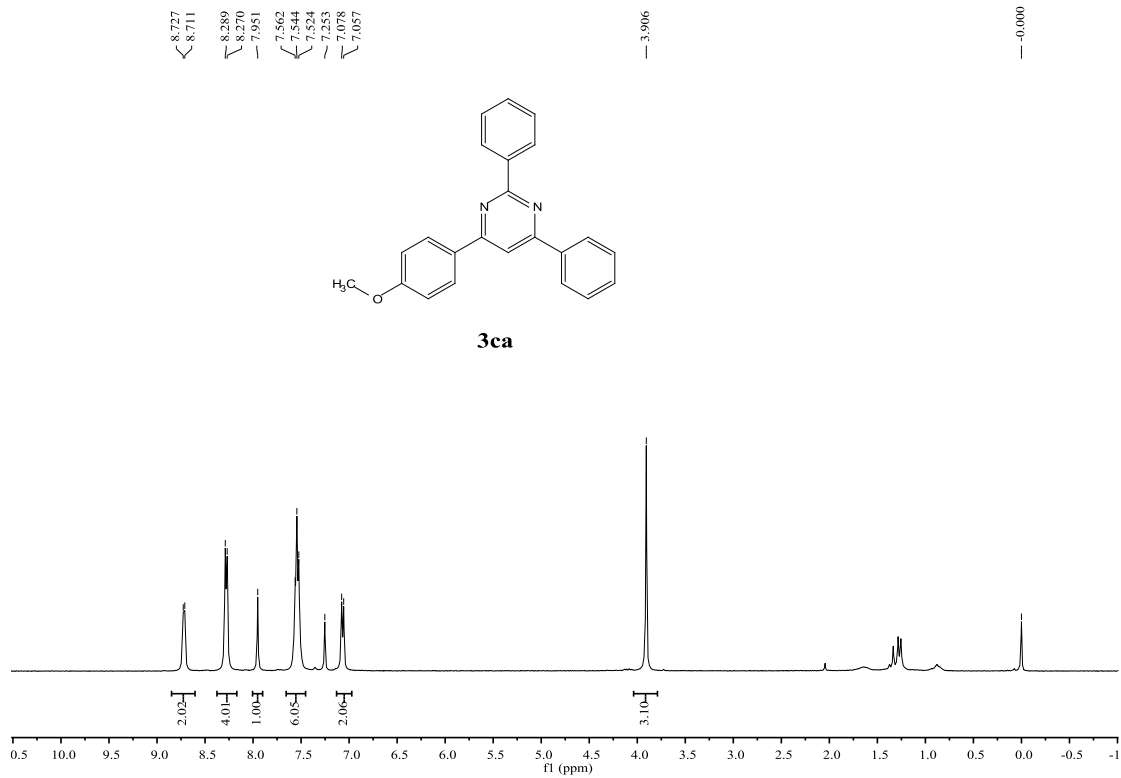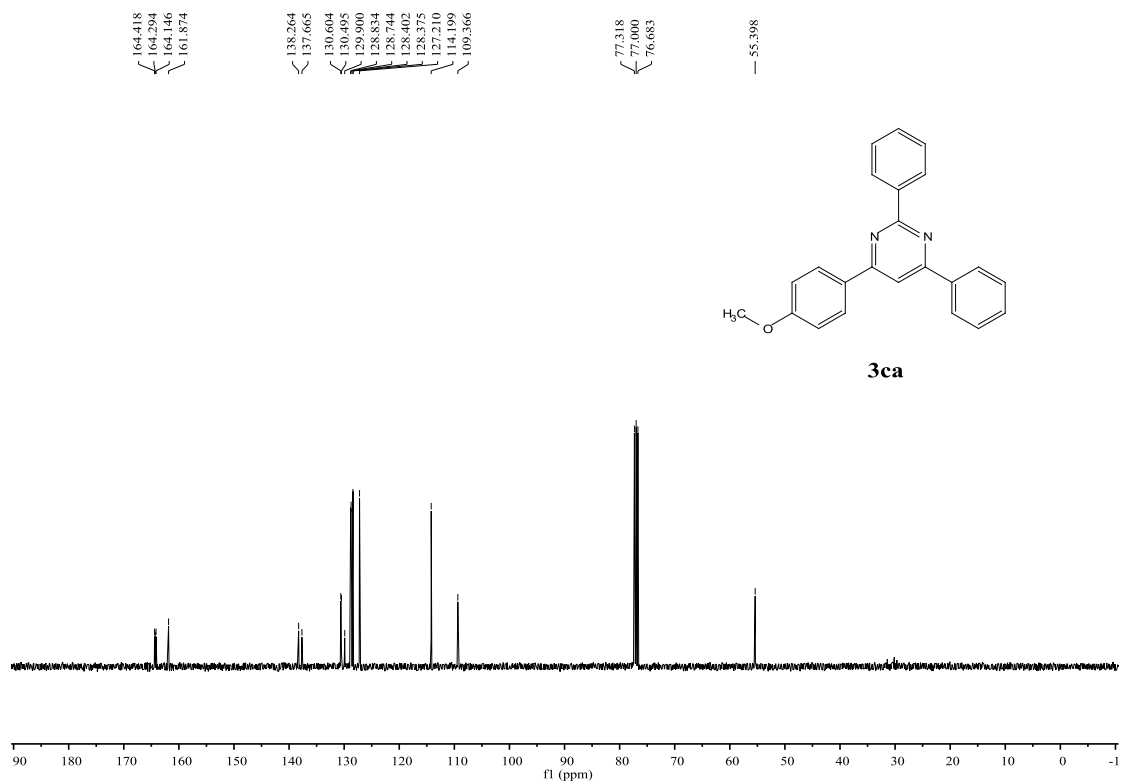

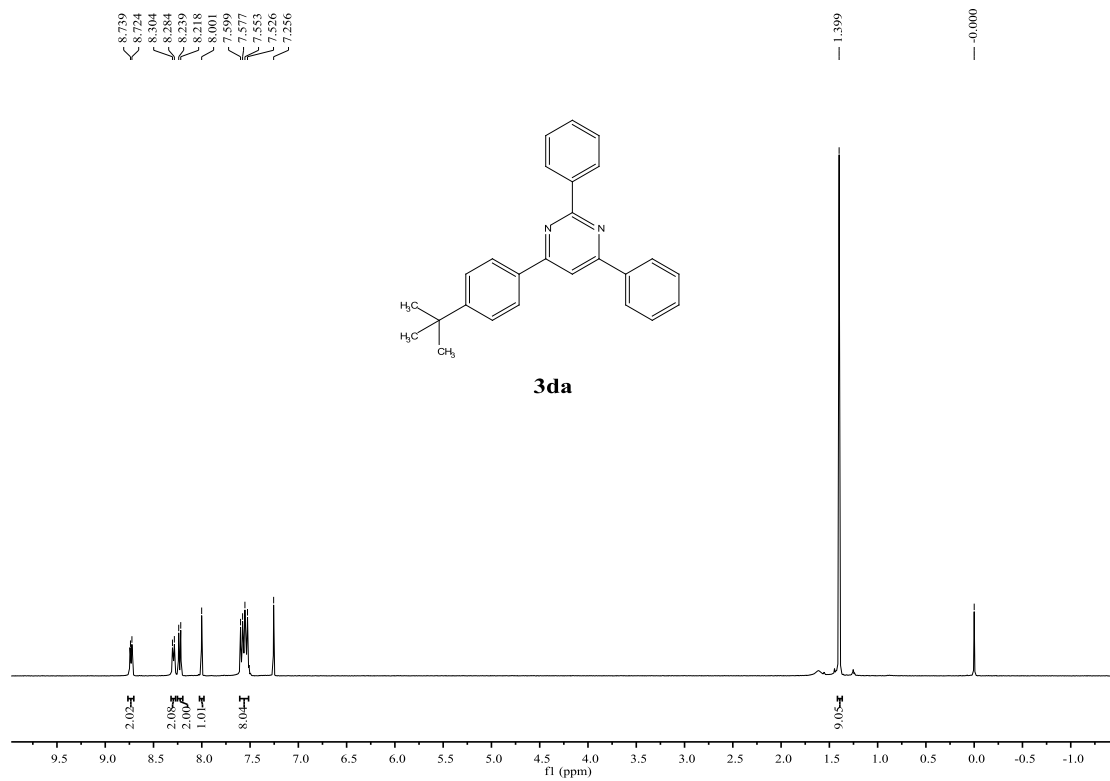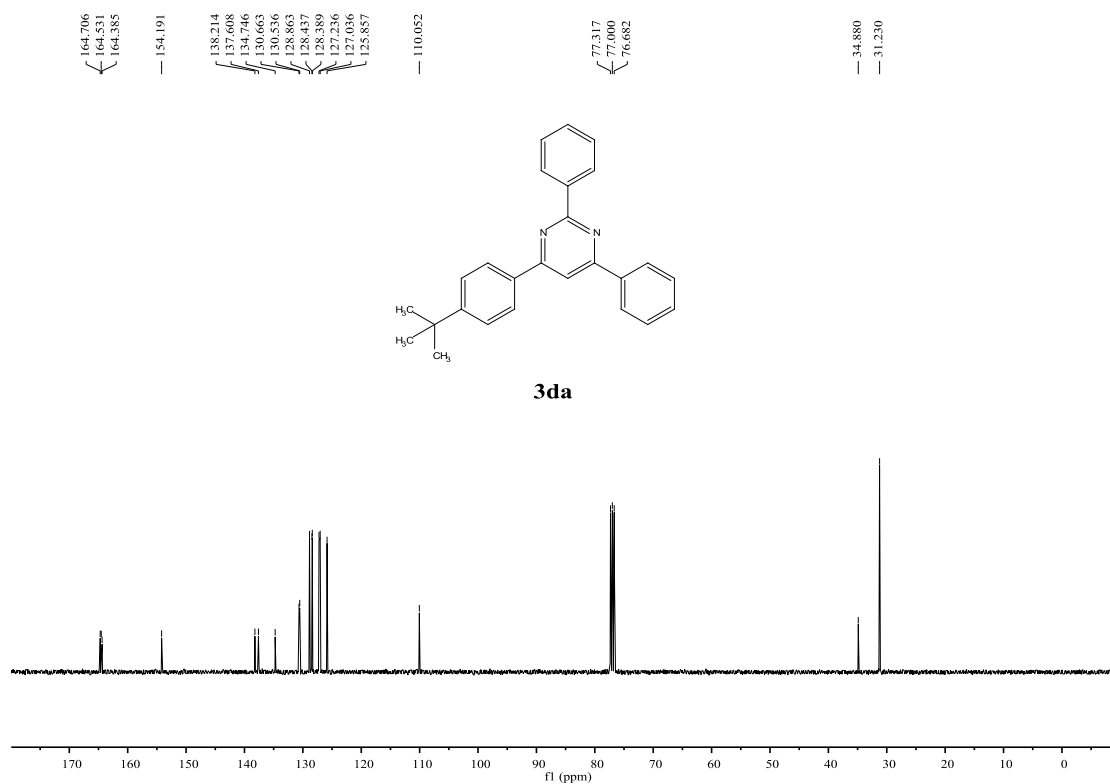

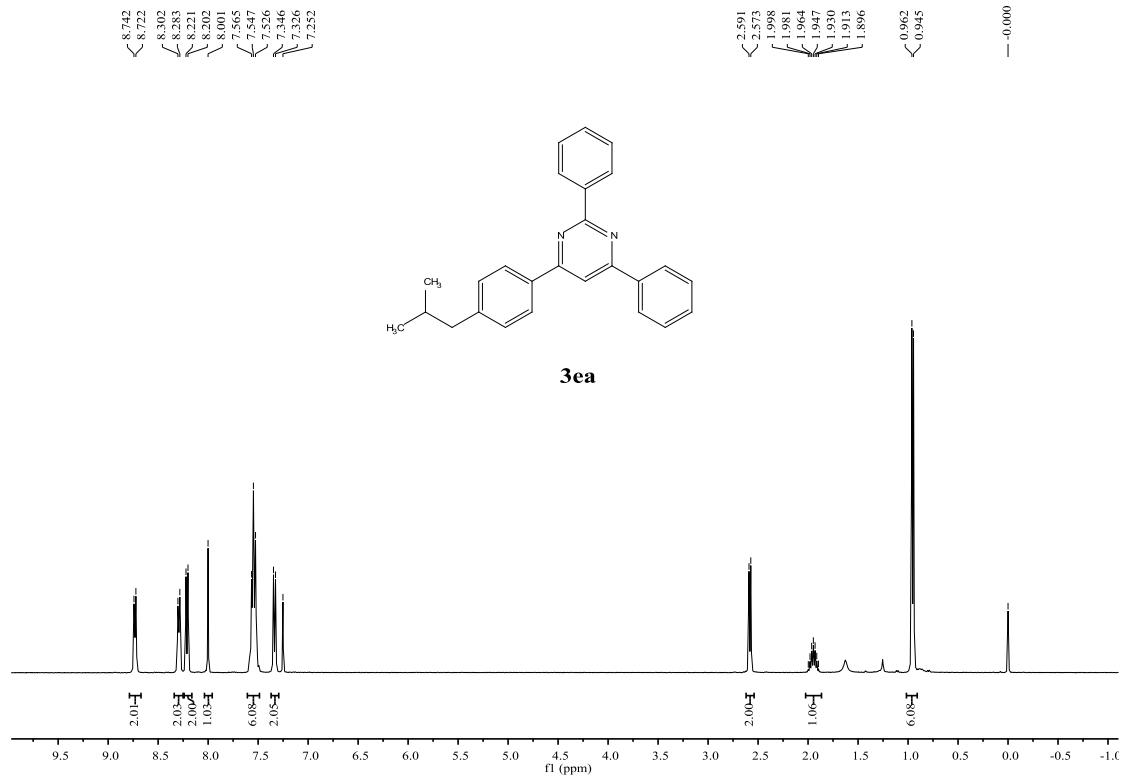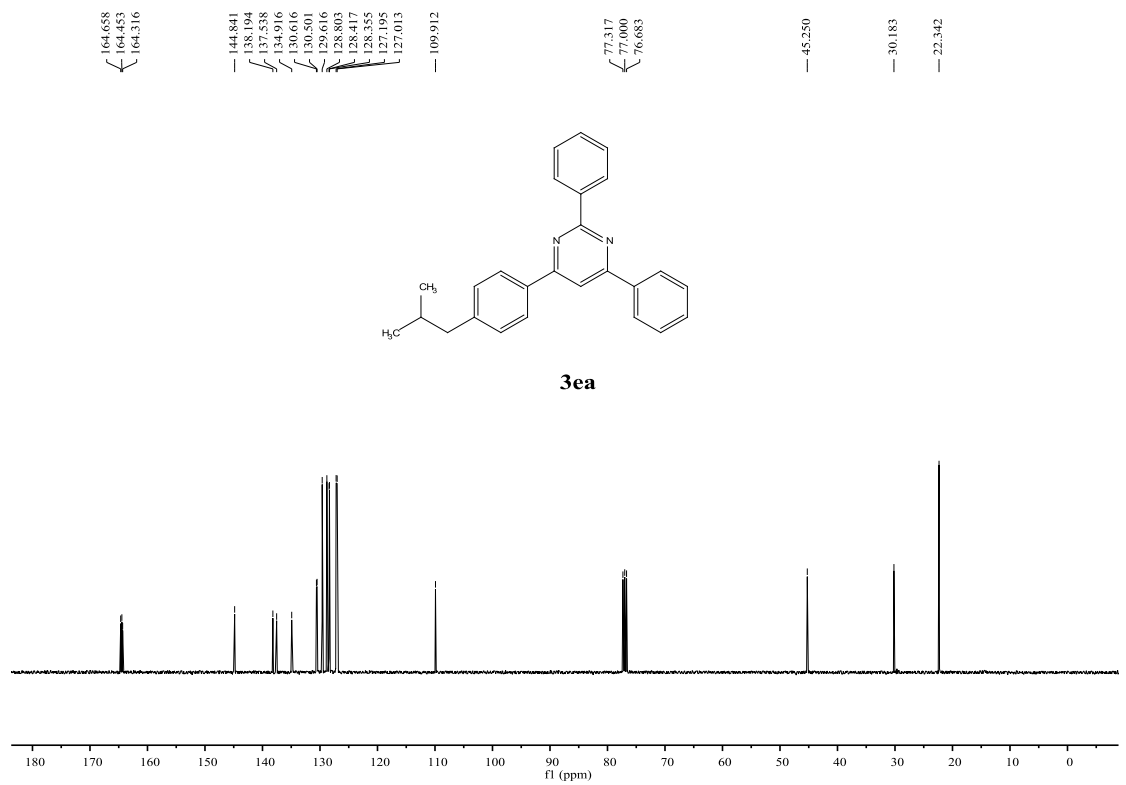

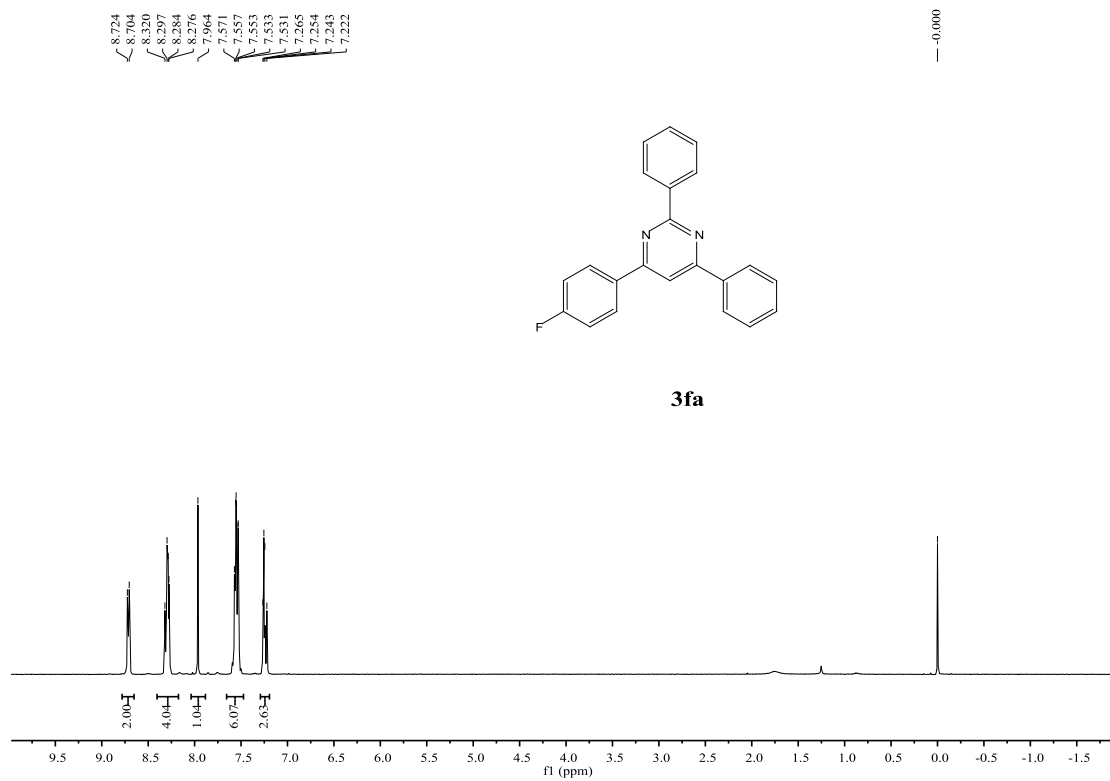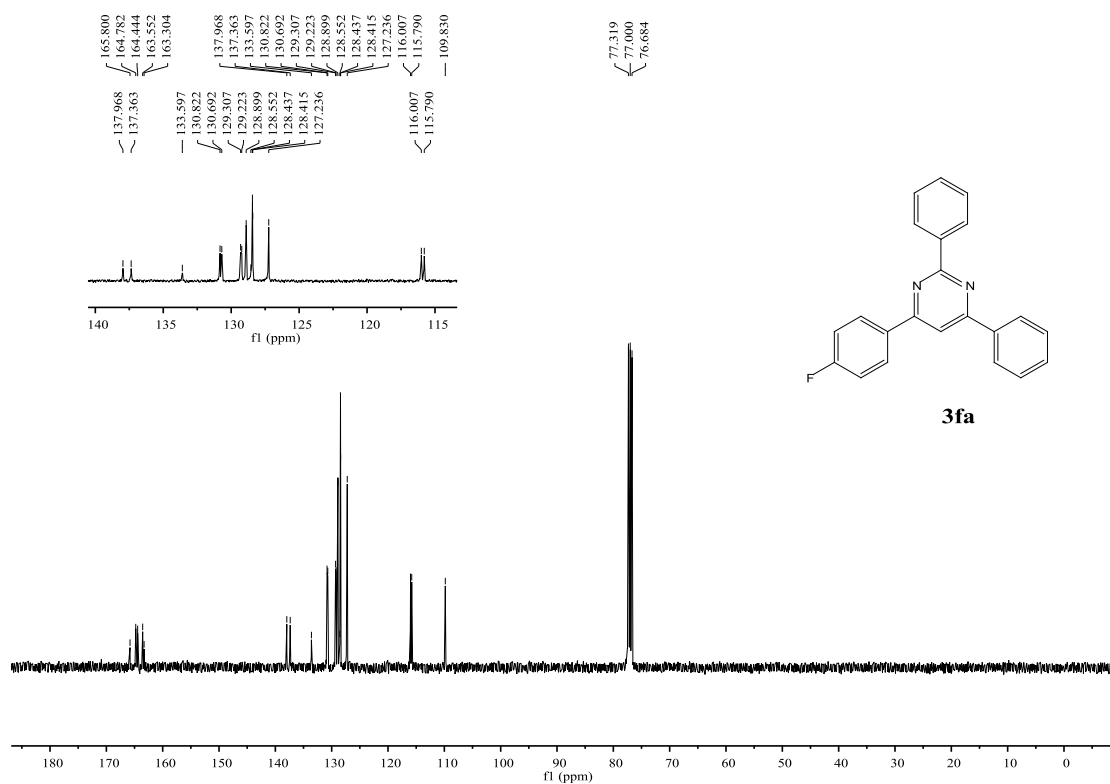

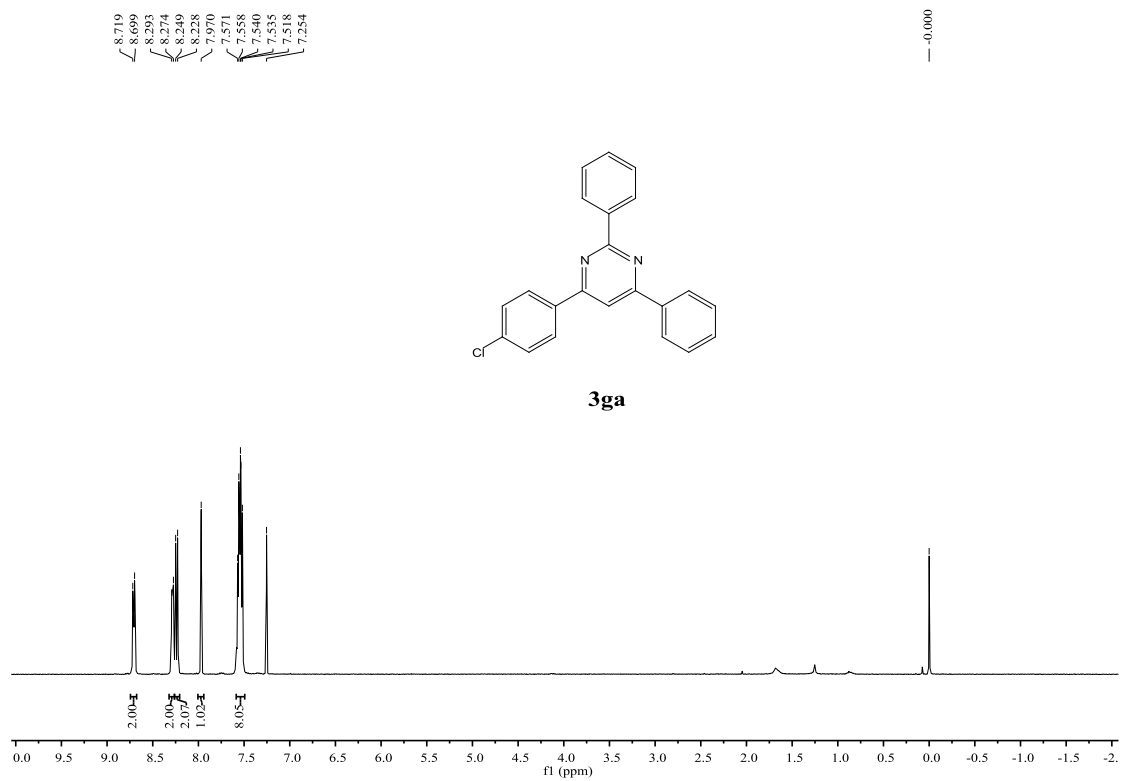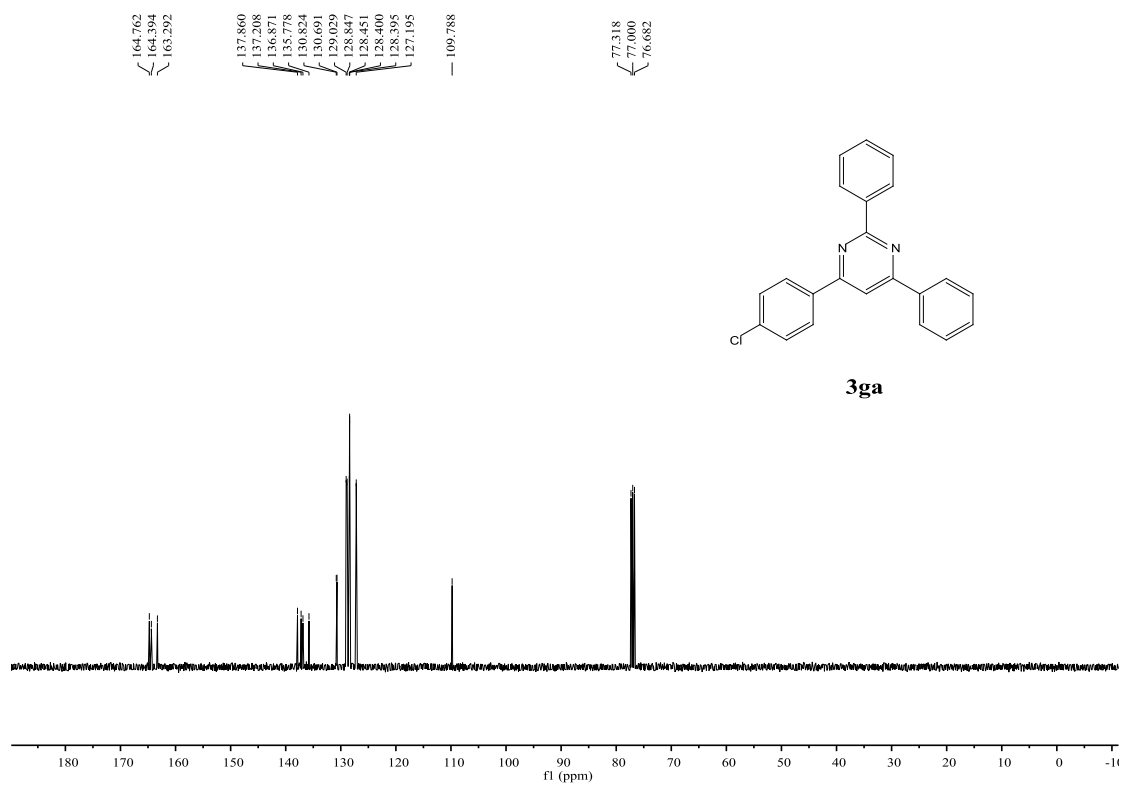



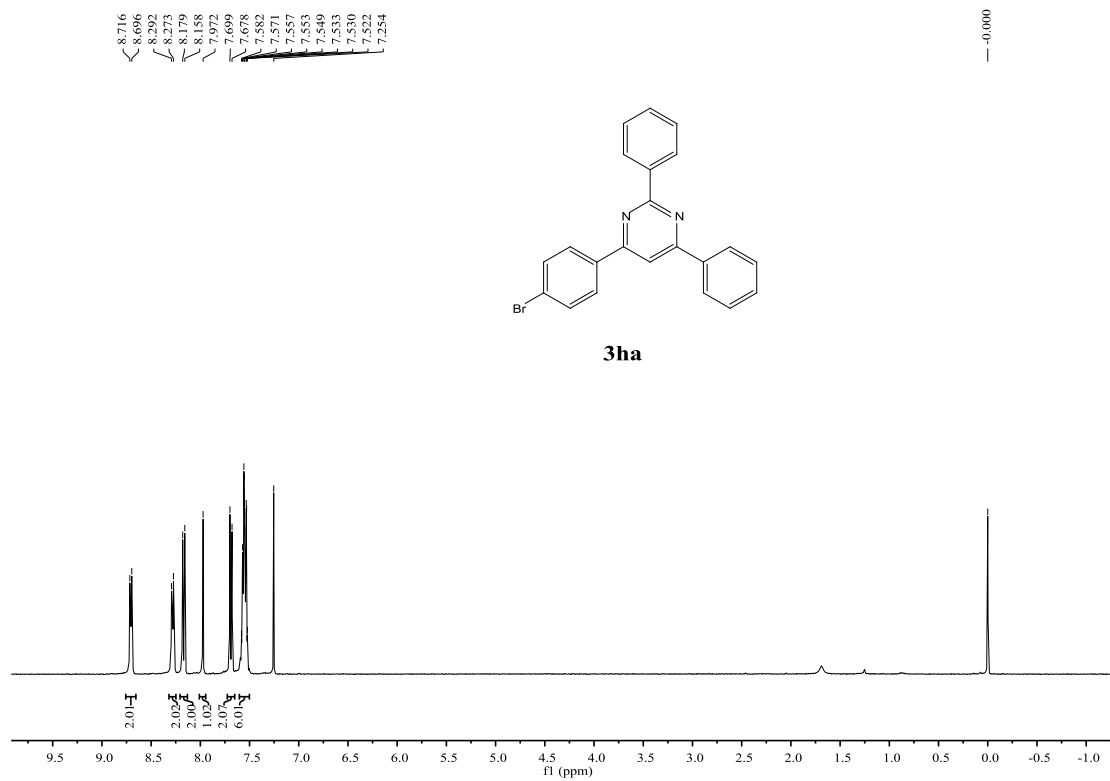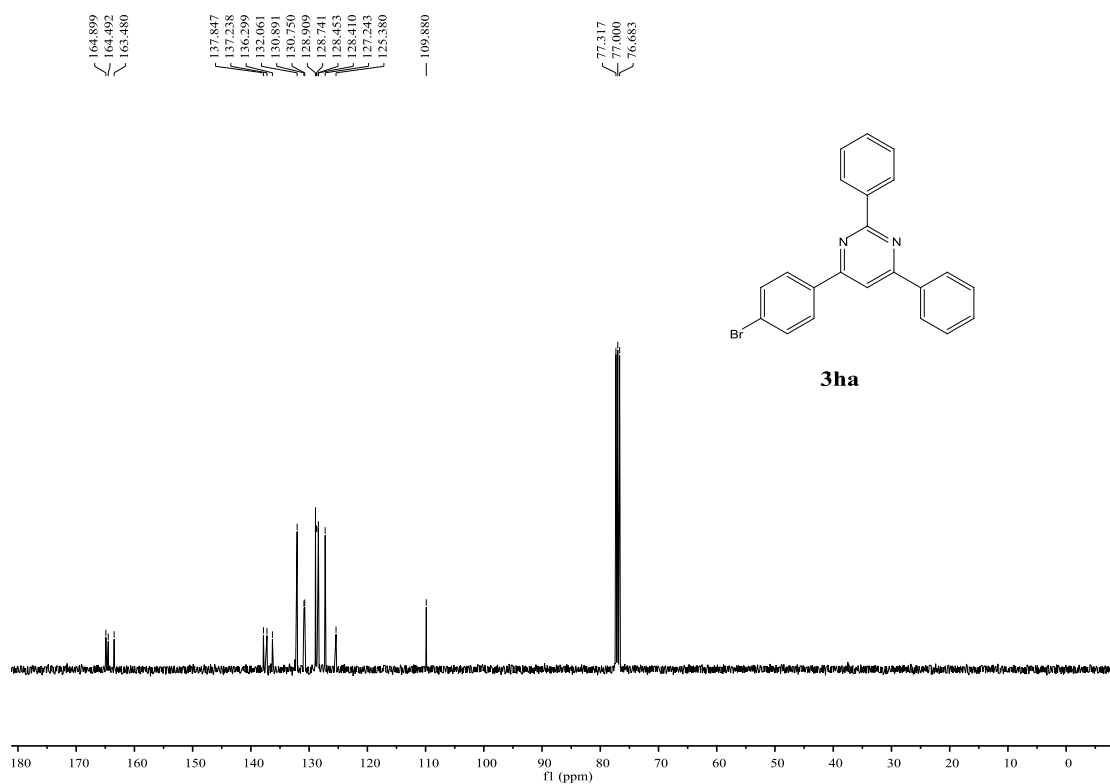

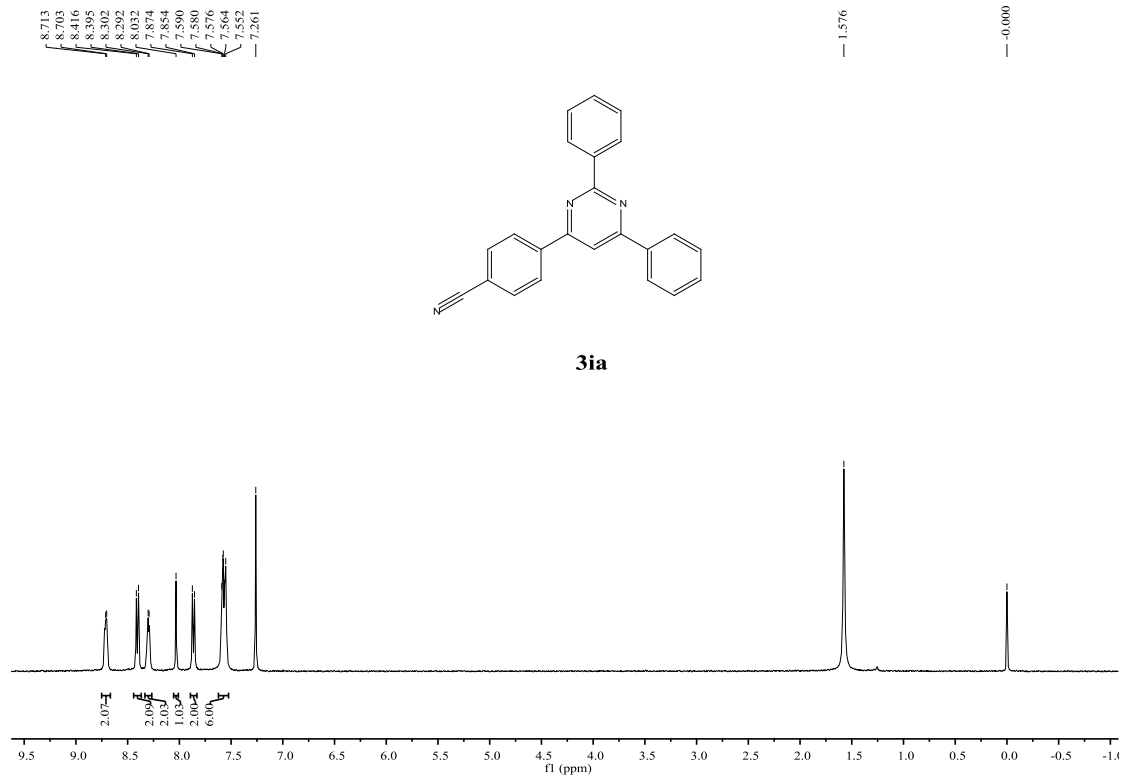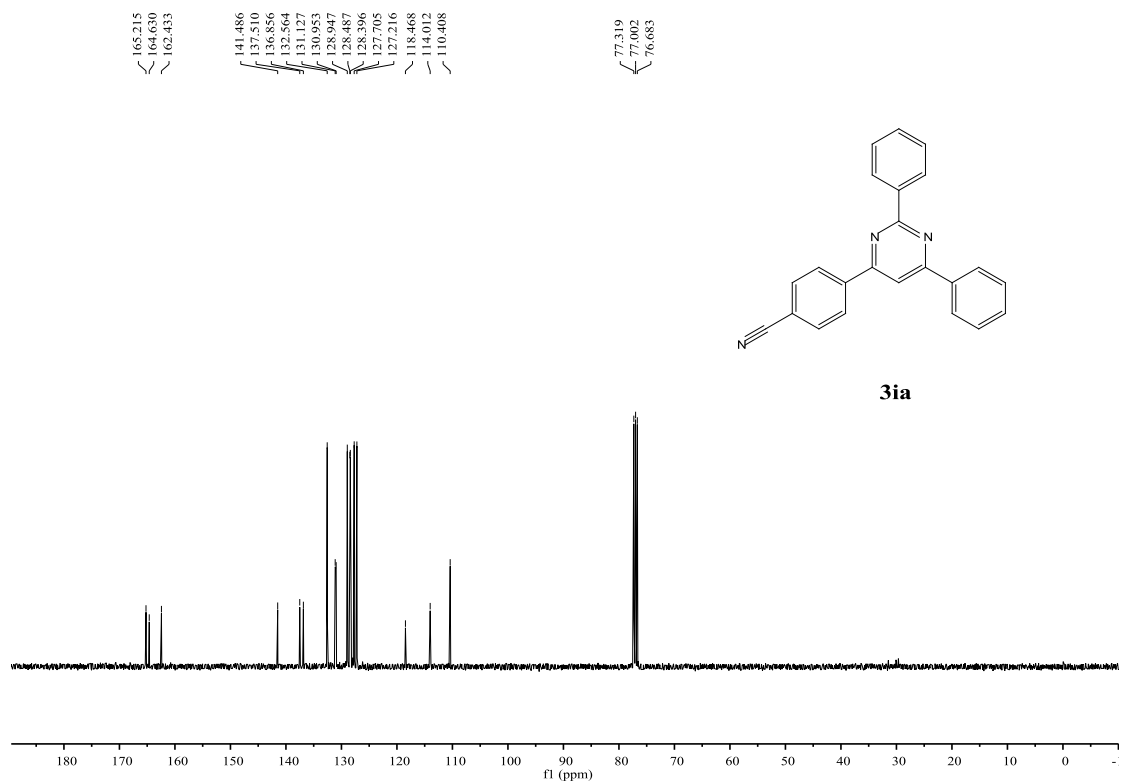

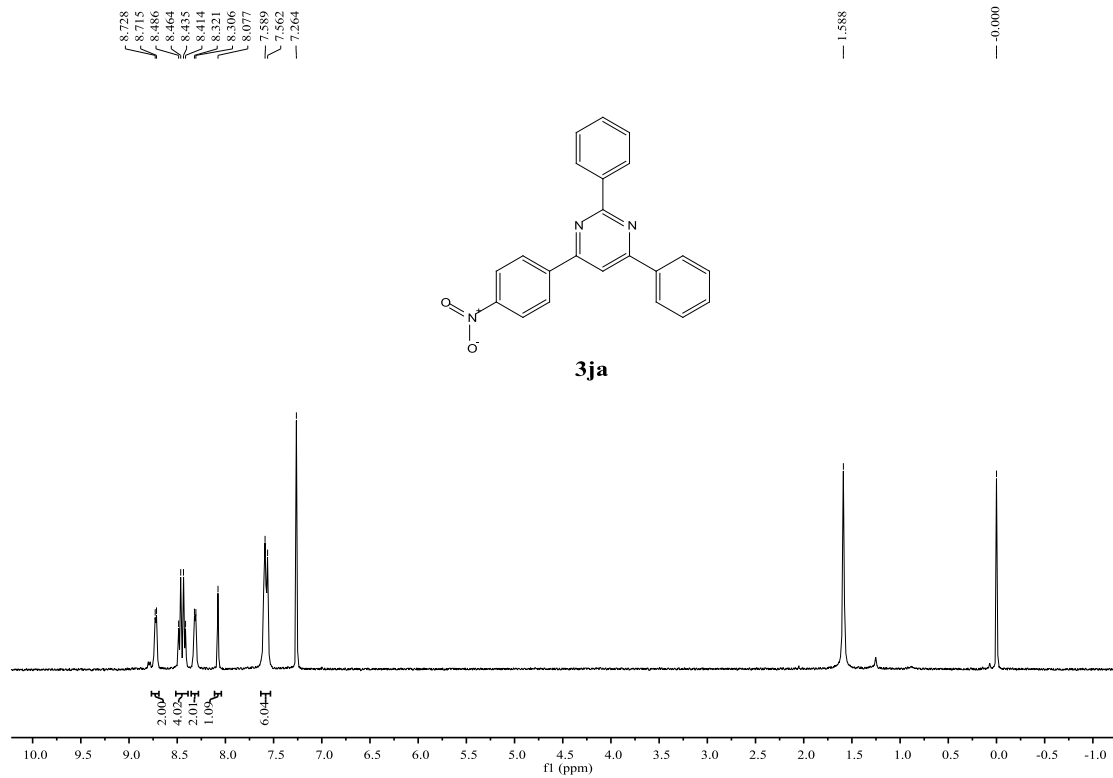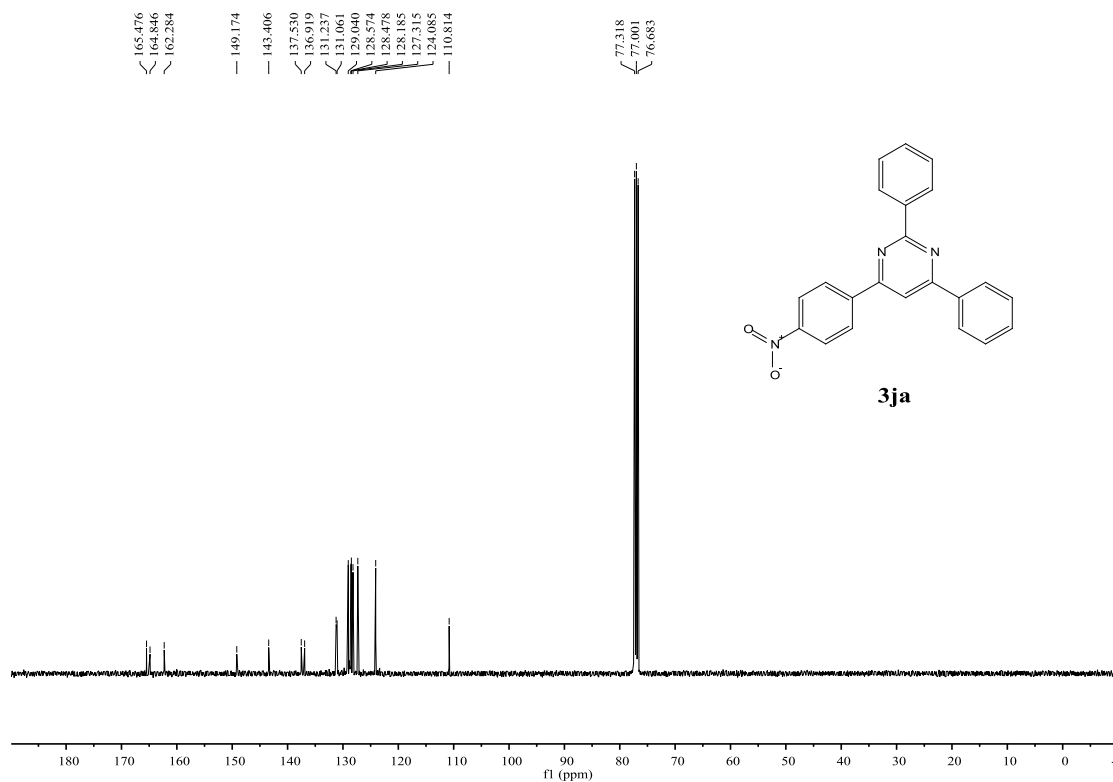

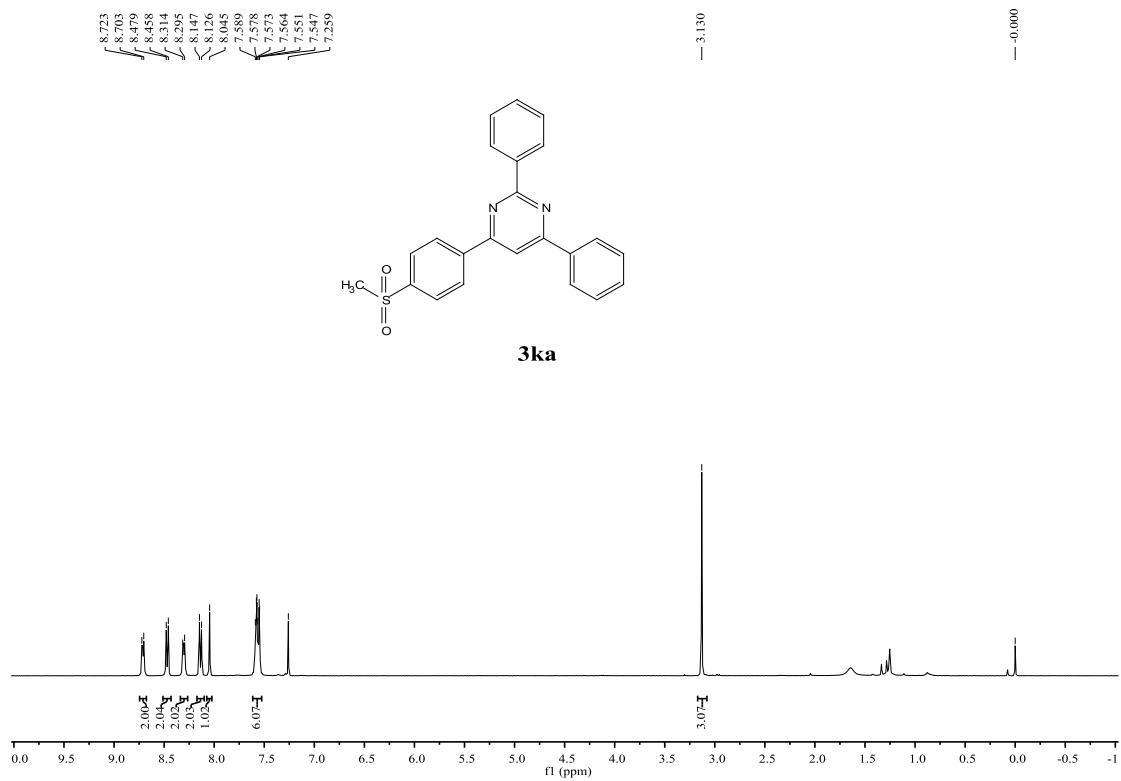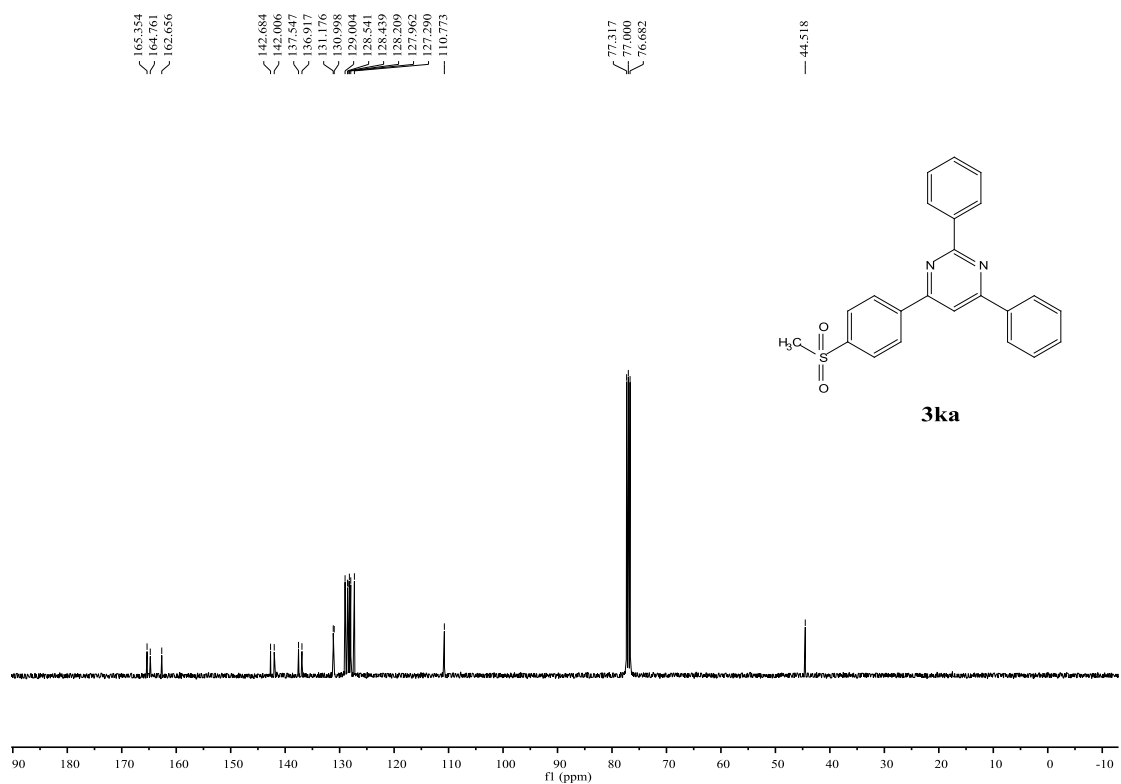

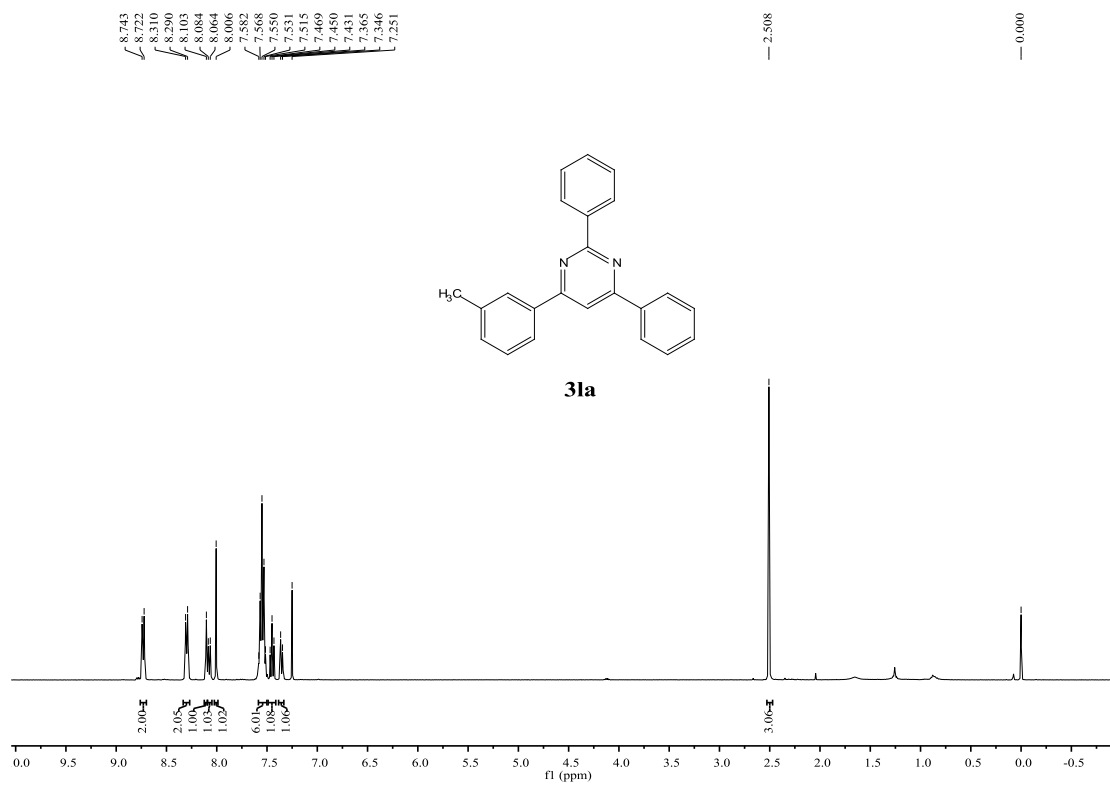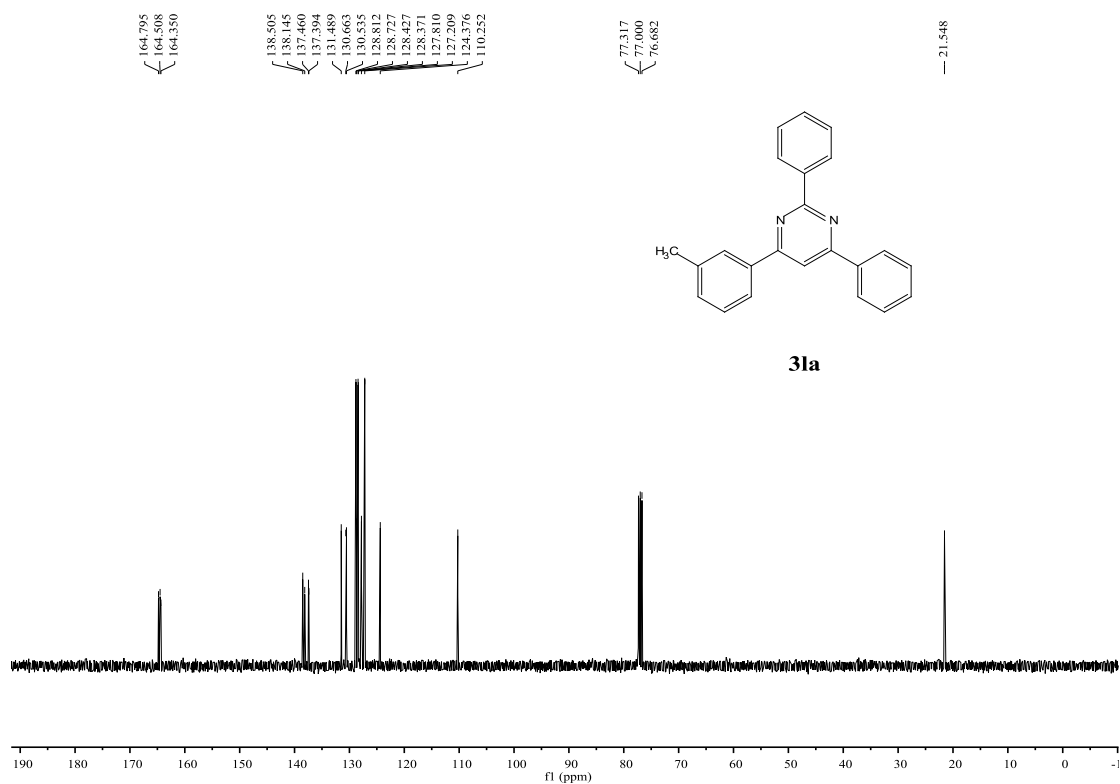

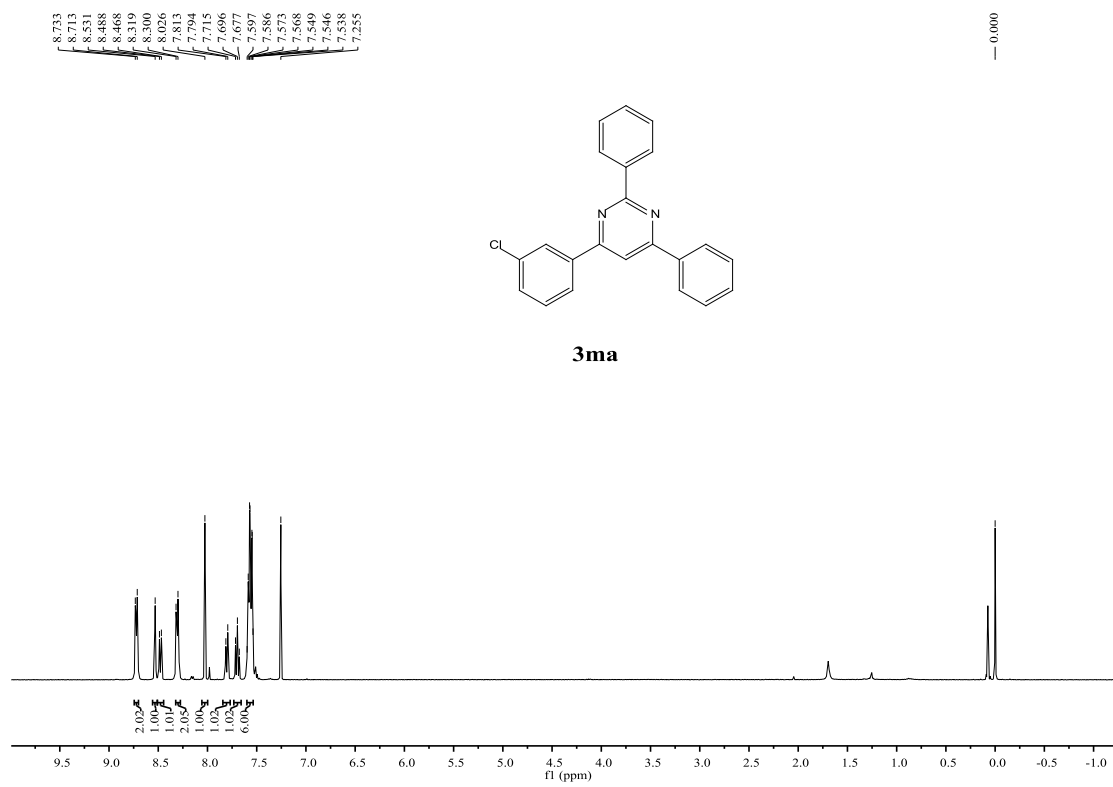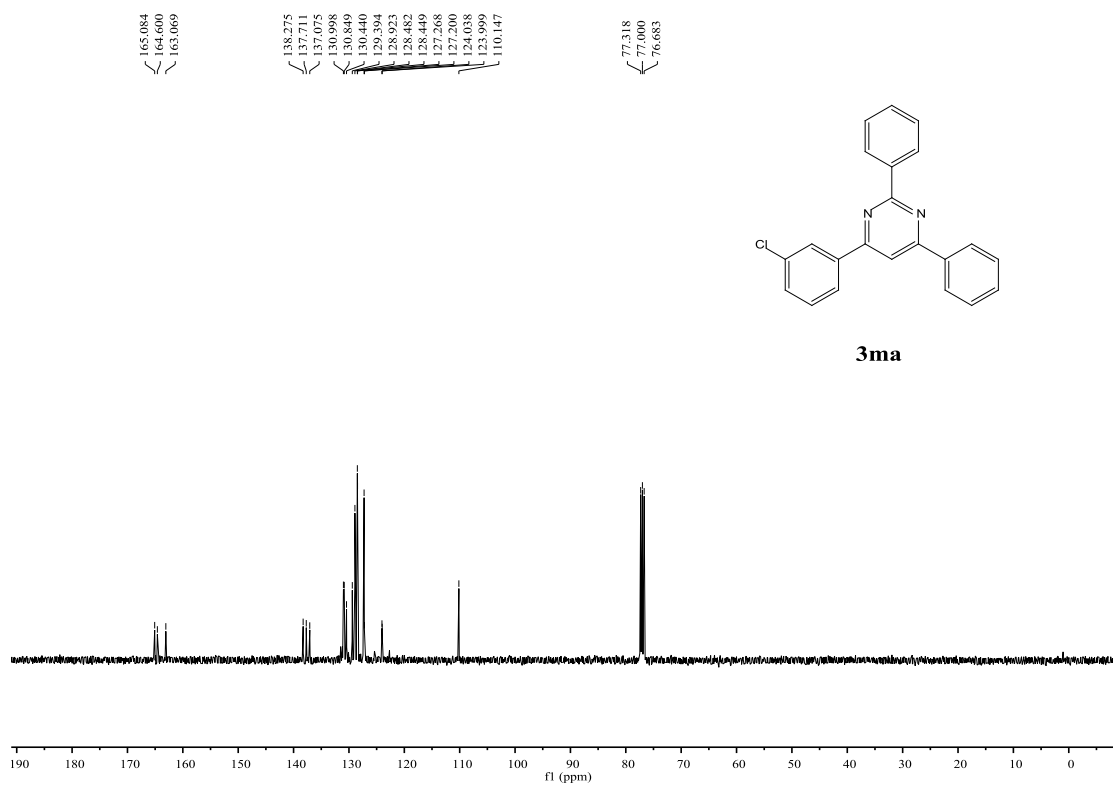

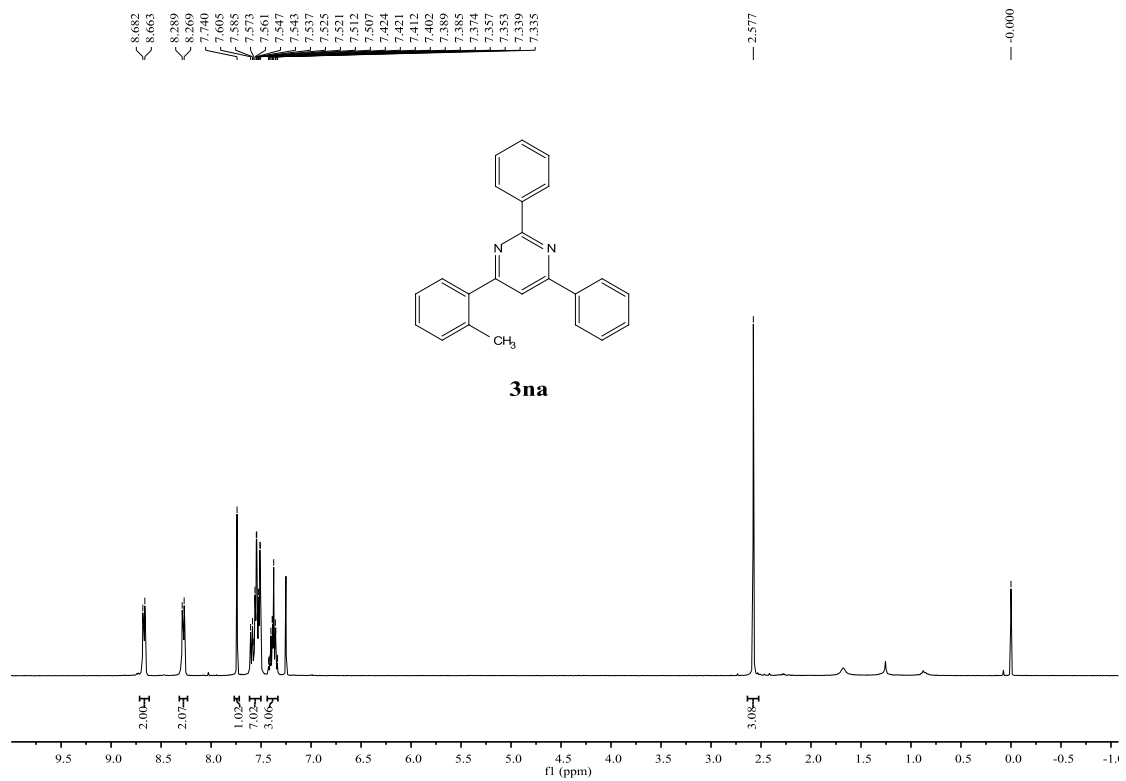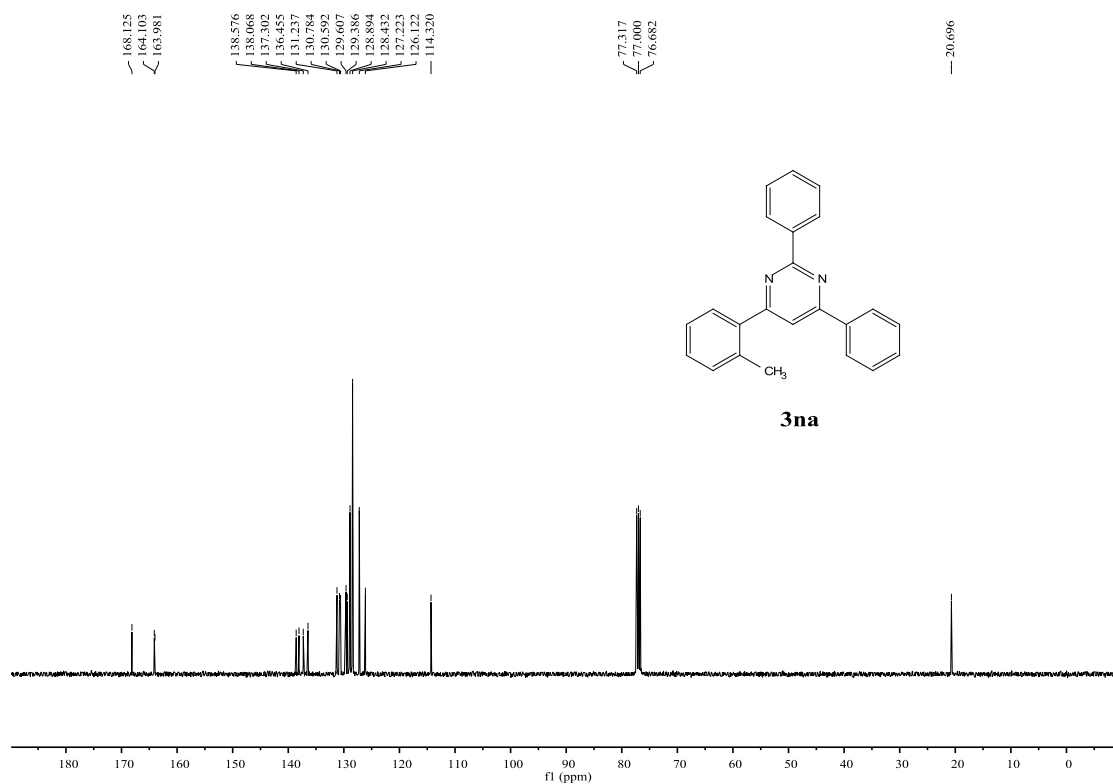

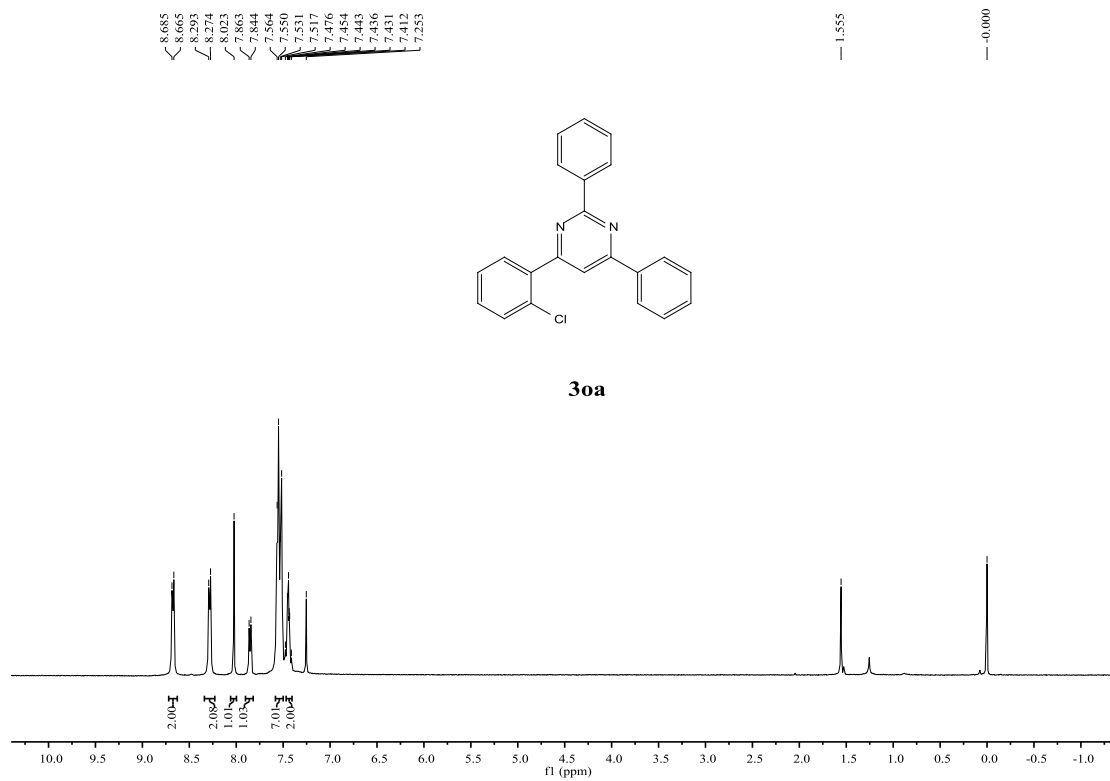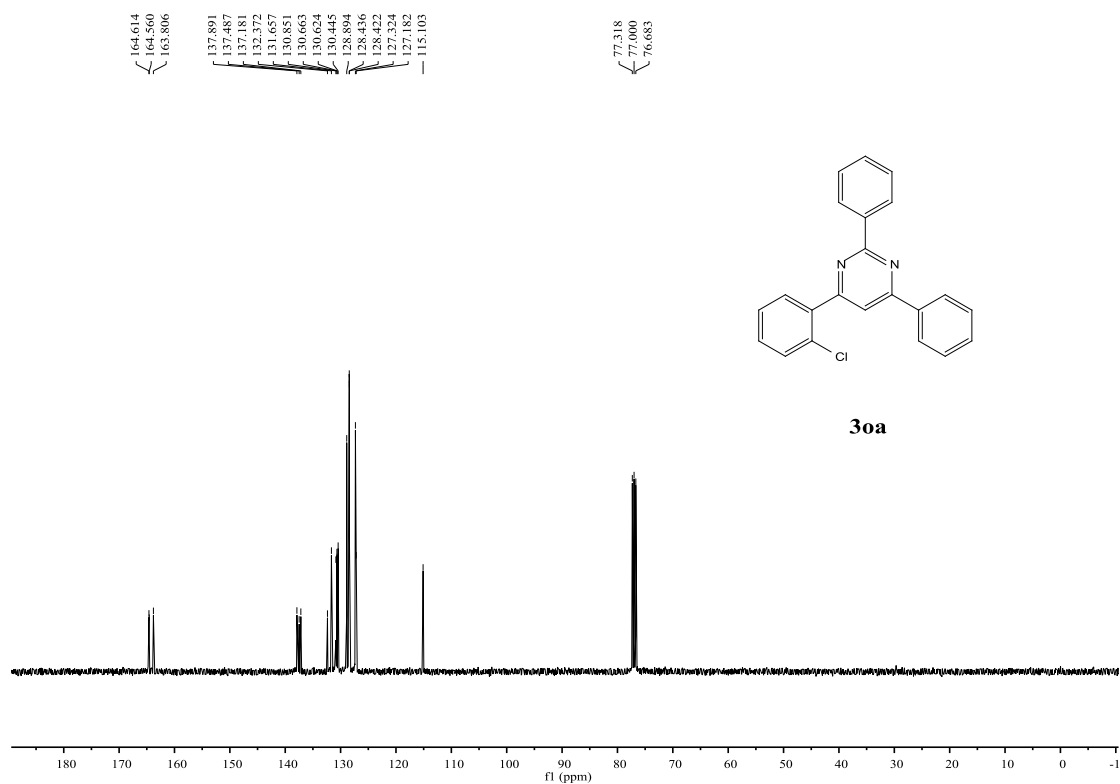



8.686  
8.666  
8.299  
8.280  
7.971  
7.763  
7.744  
7.726  
7.552  
7.548  
7.530  
7.516  
7.512  
7.492  
7.476  
7.367  
7.348  
7.329  
7.254

-0.000

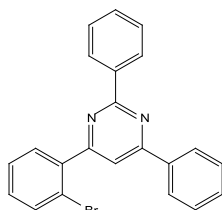

**3pa**

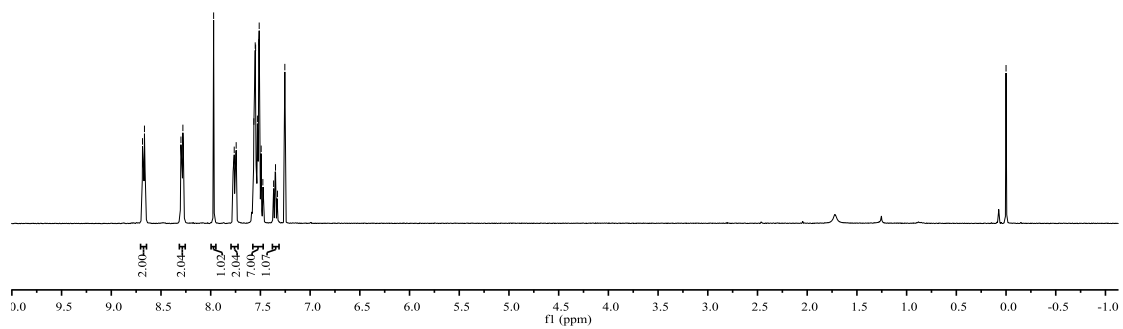

166.030  
164.489  
163.764  
139.515  
137.865  
137.153  
133.706  
131.547  
130.883  
130.700  
130.682  
128.911  
128.445  
127.731  
127.323  
121.616  
115.029

77.318  
77.000  
76.682

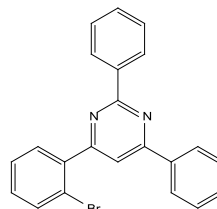

**3pa**

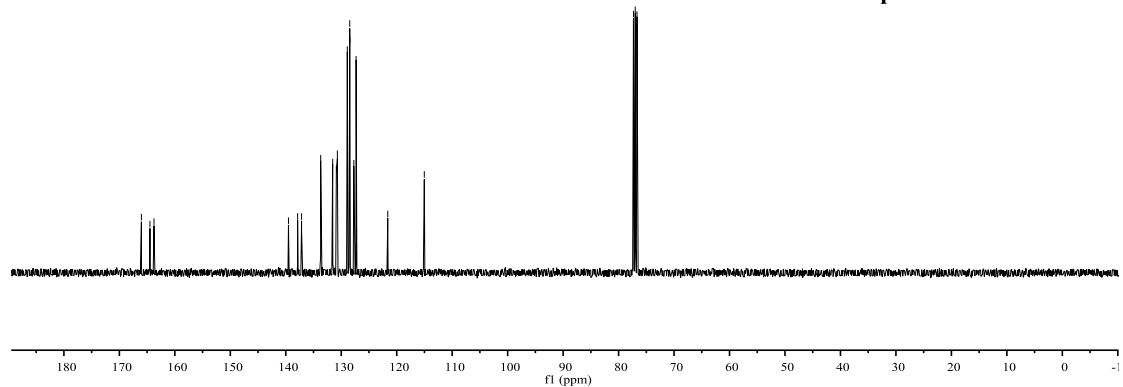

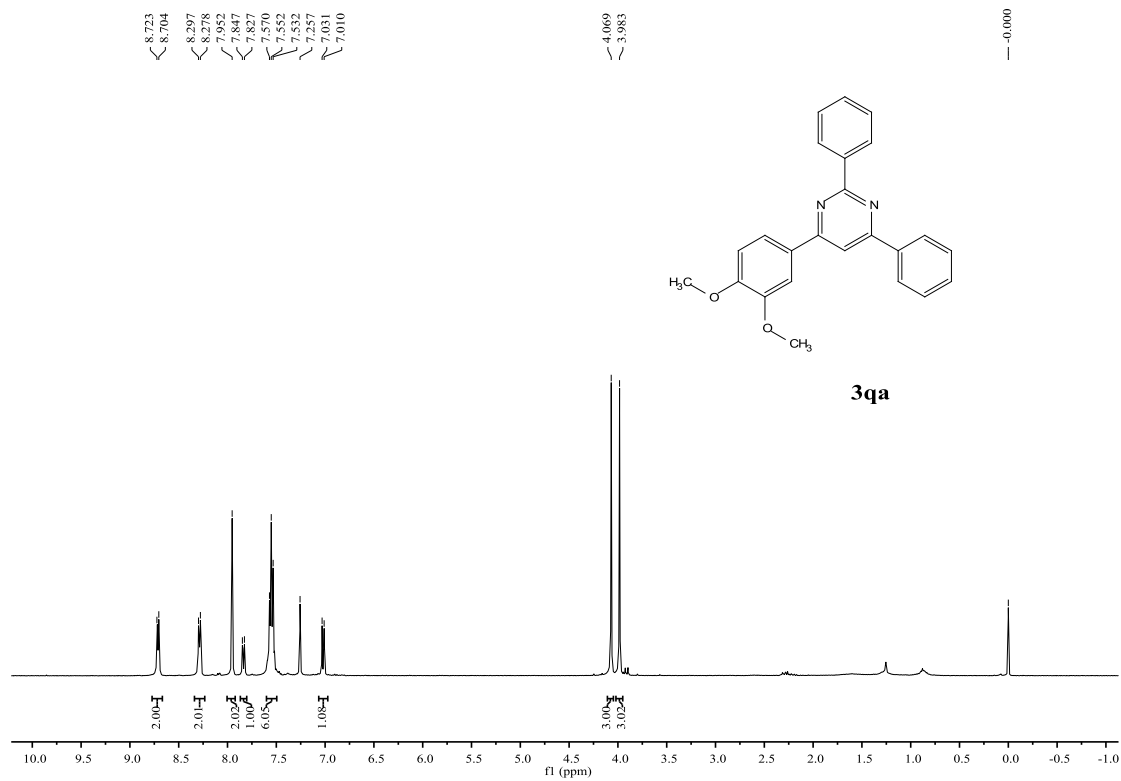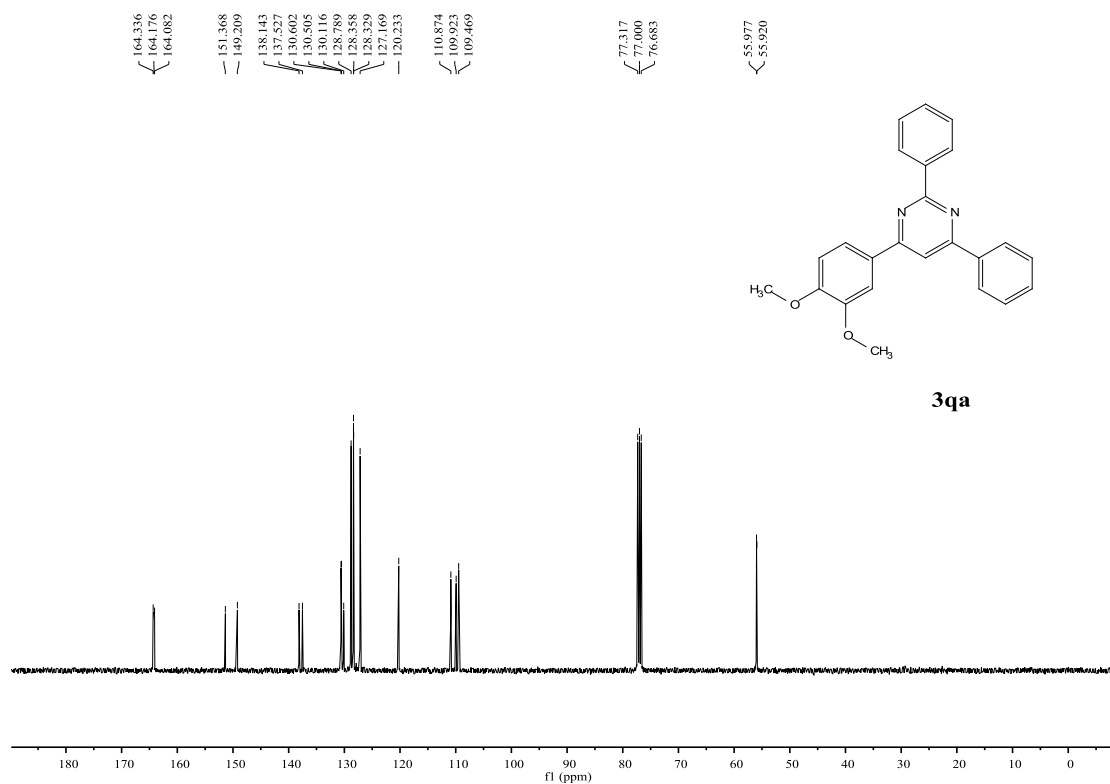

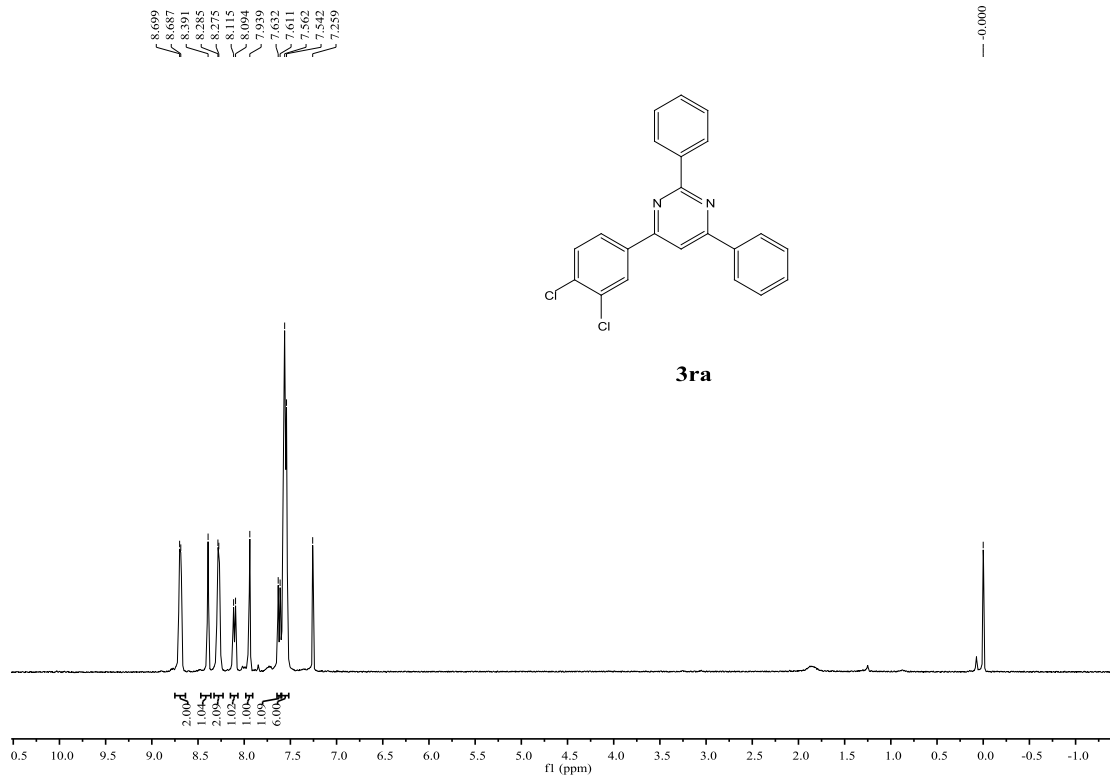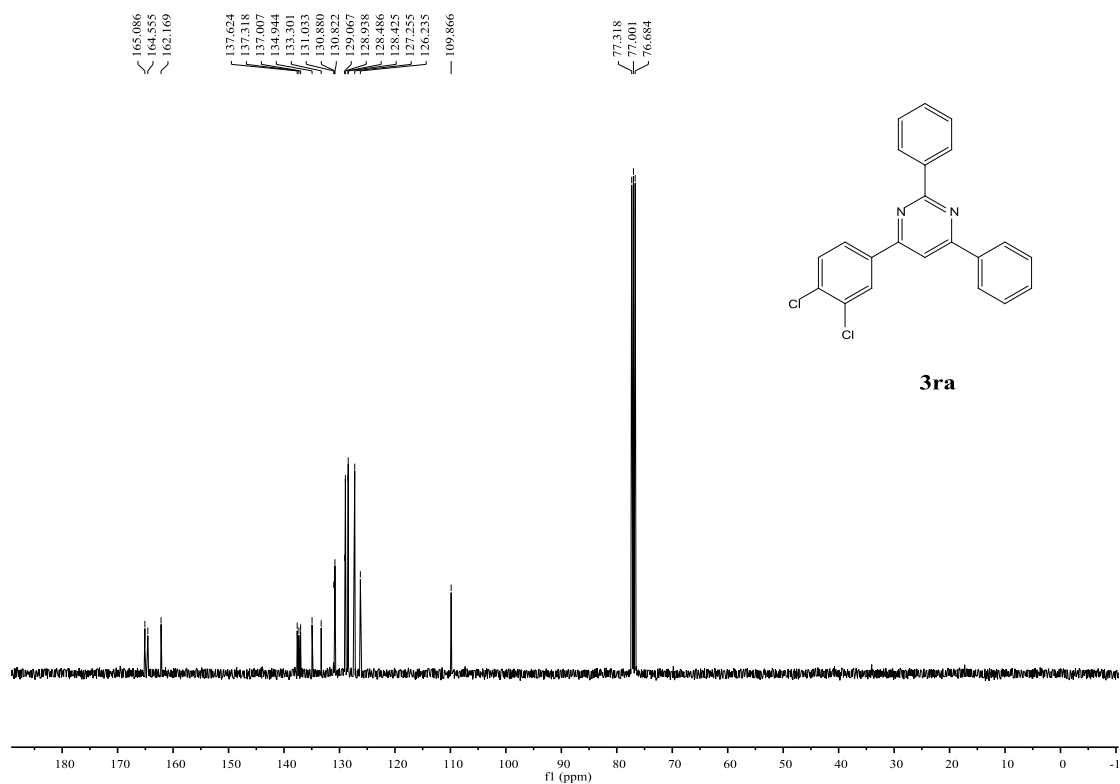

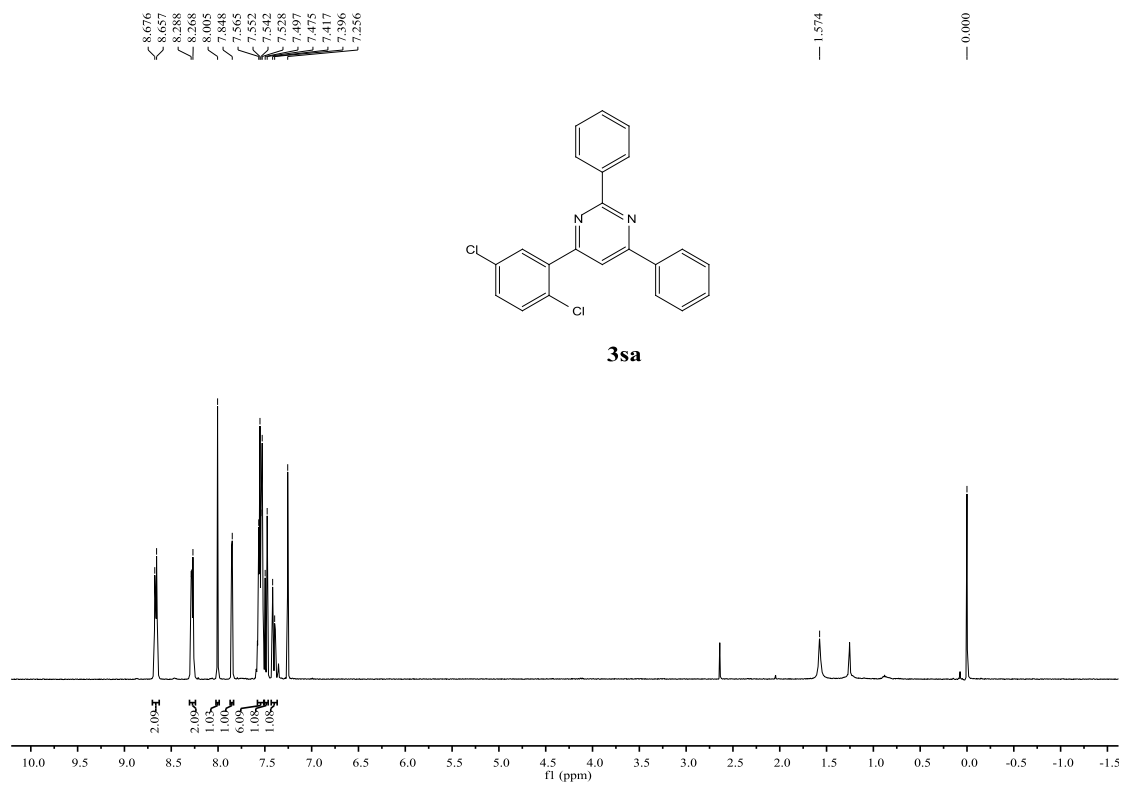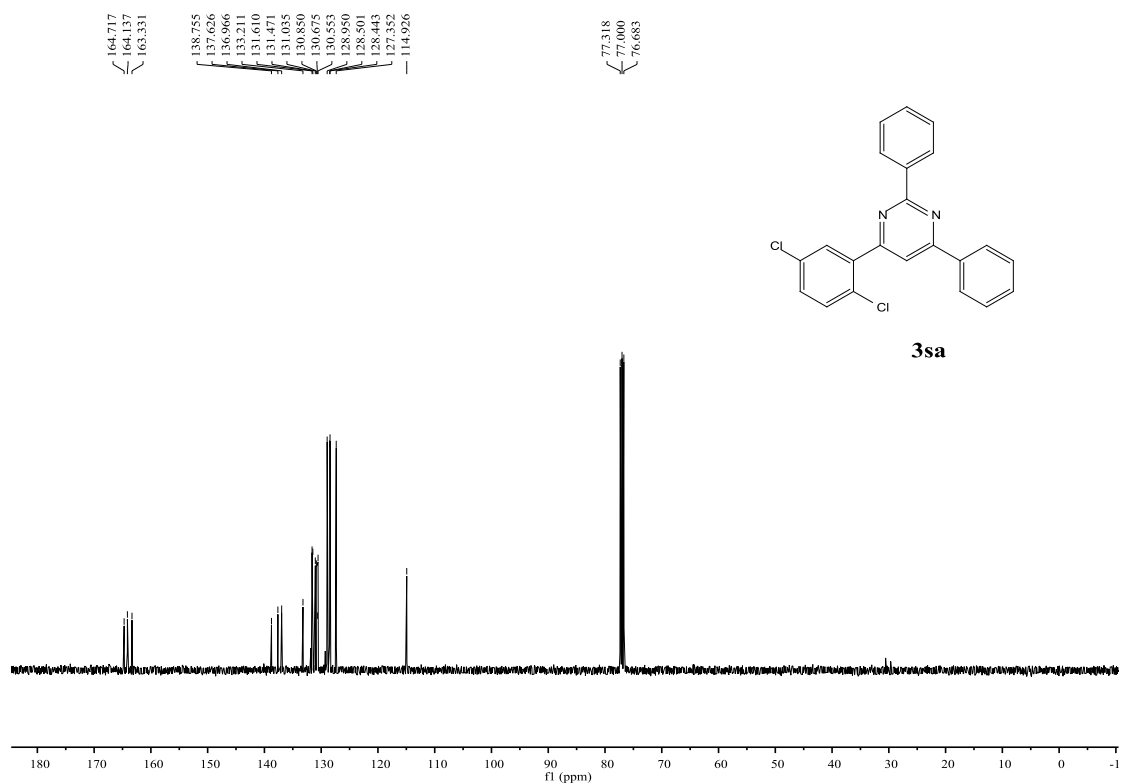

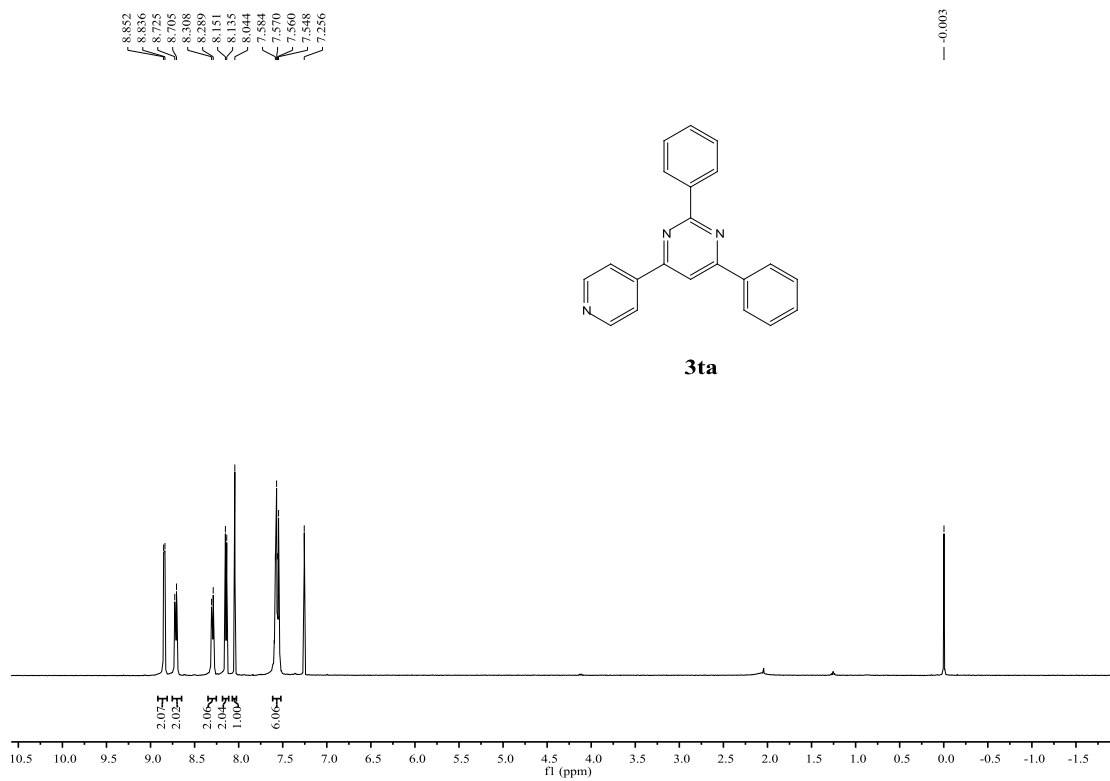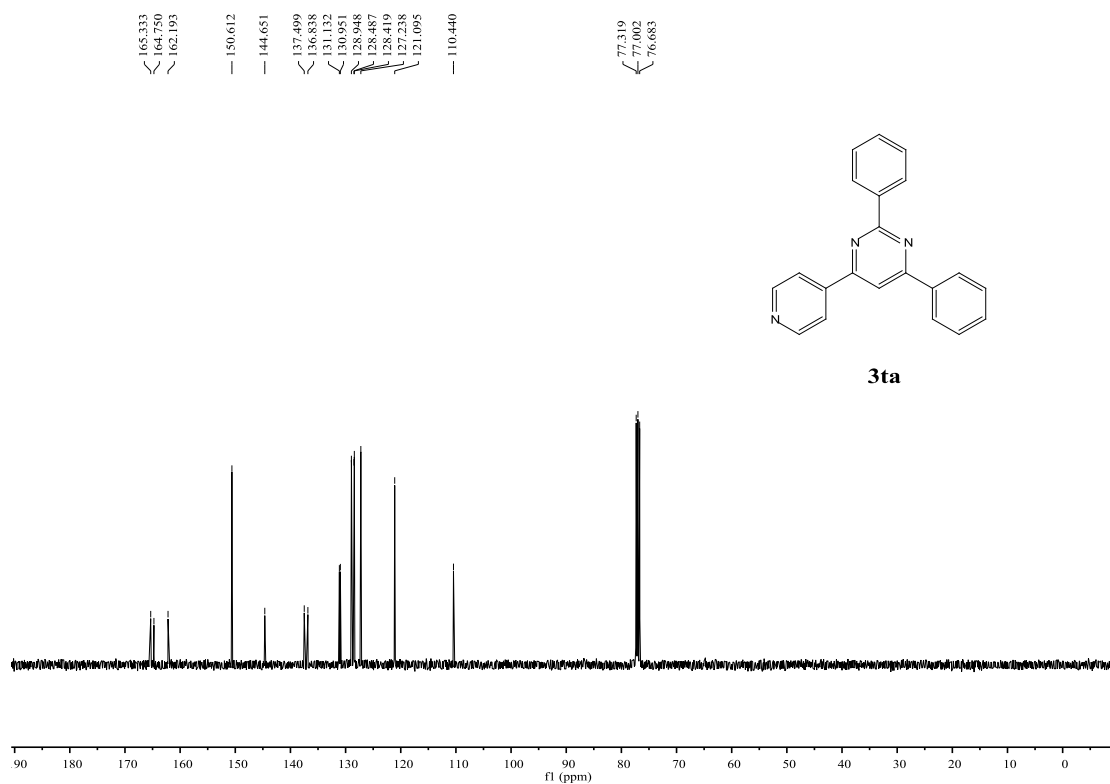

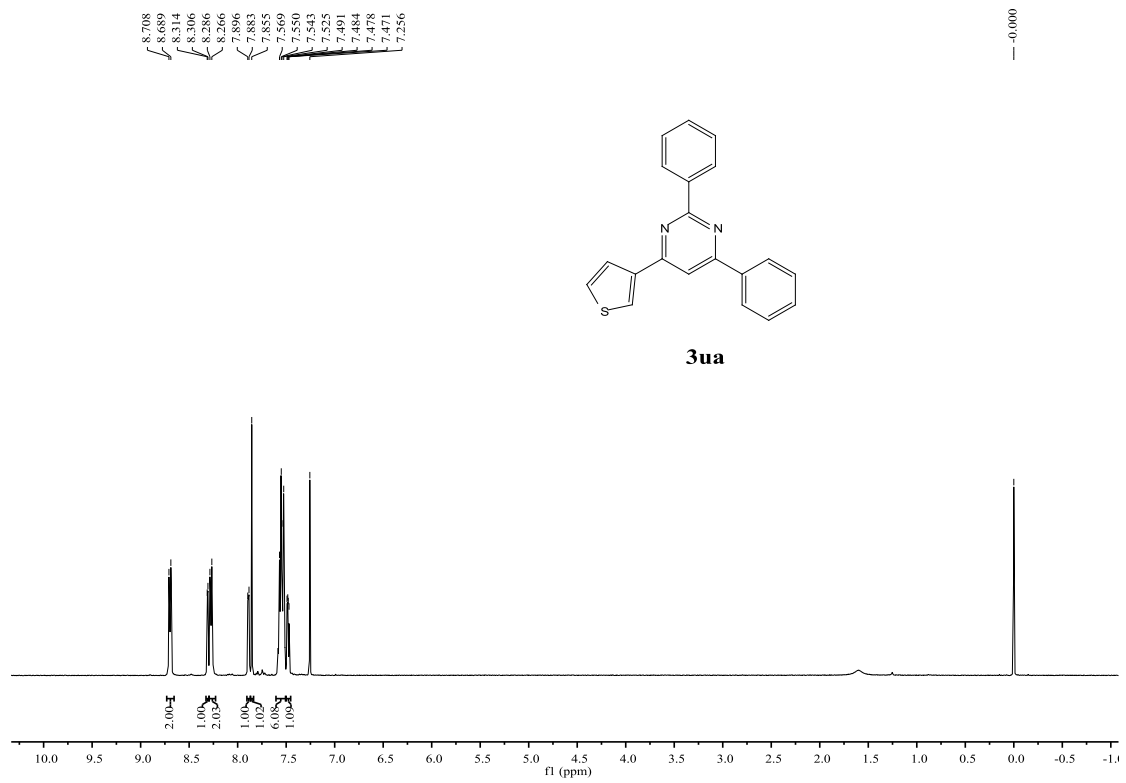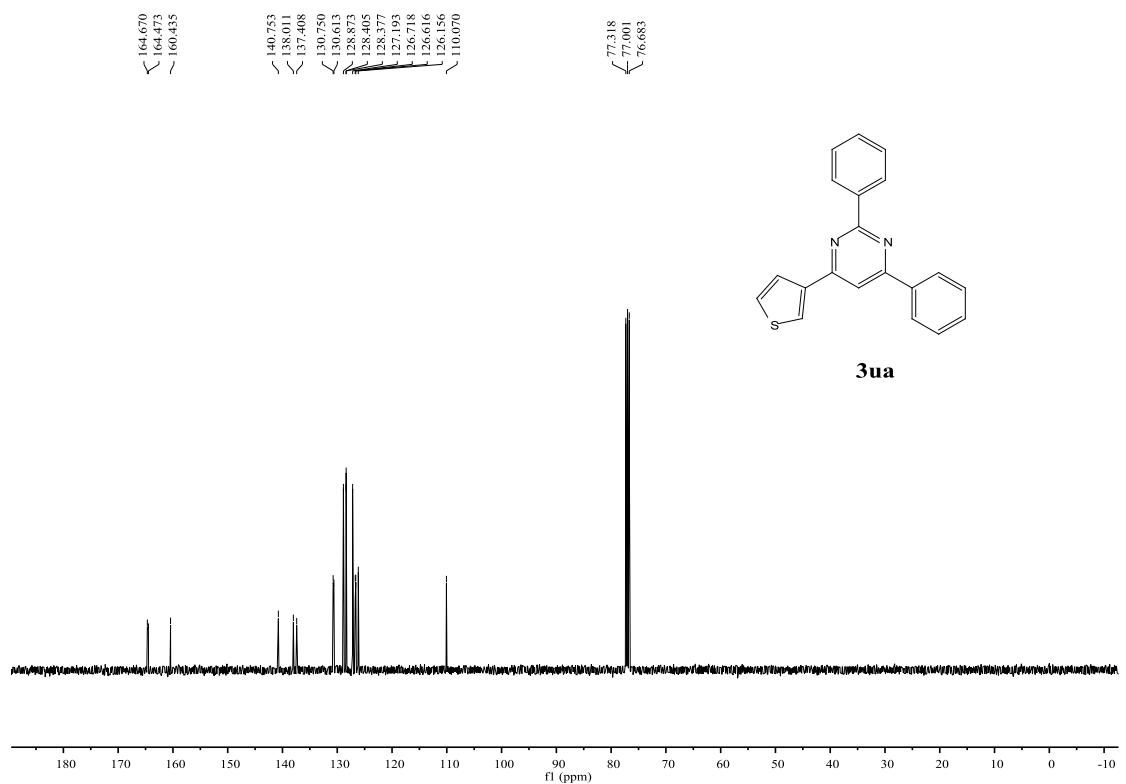

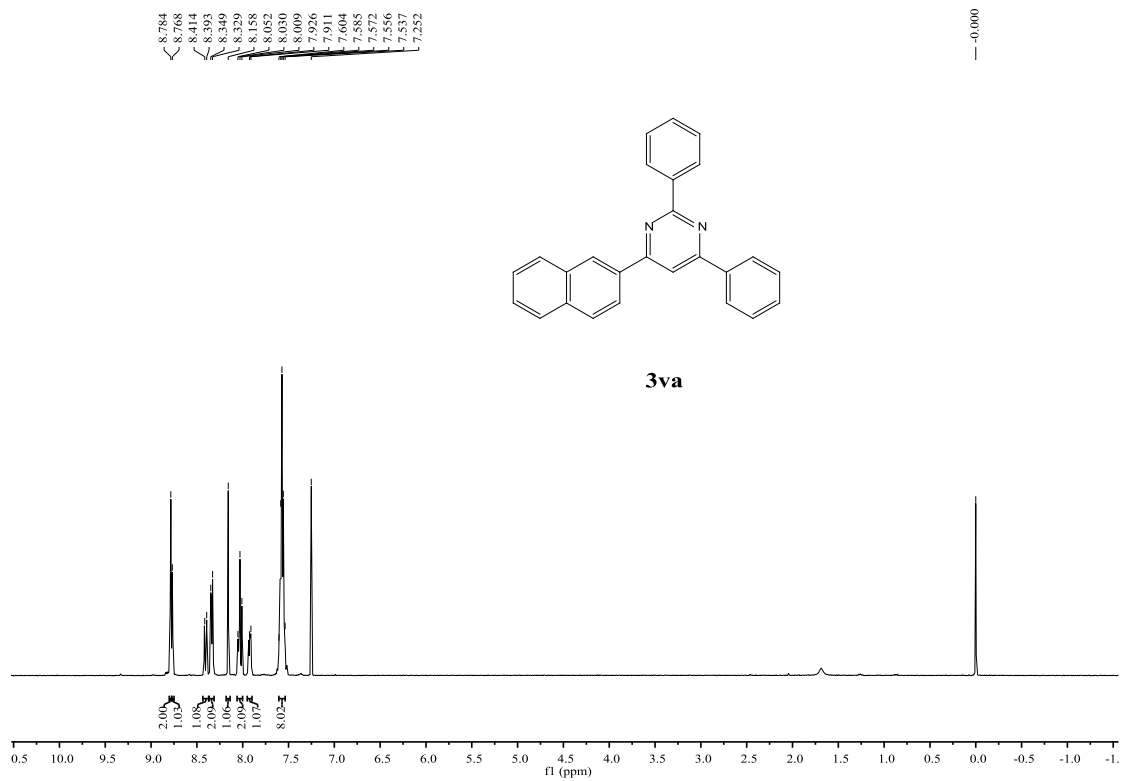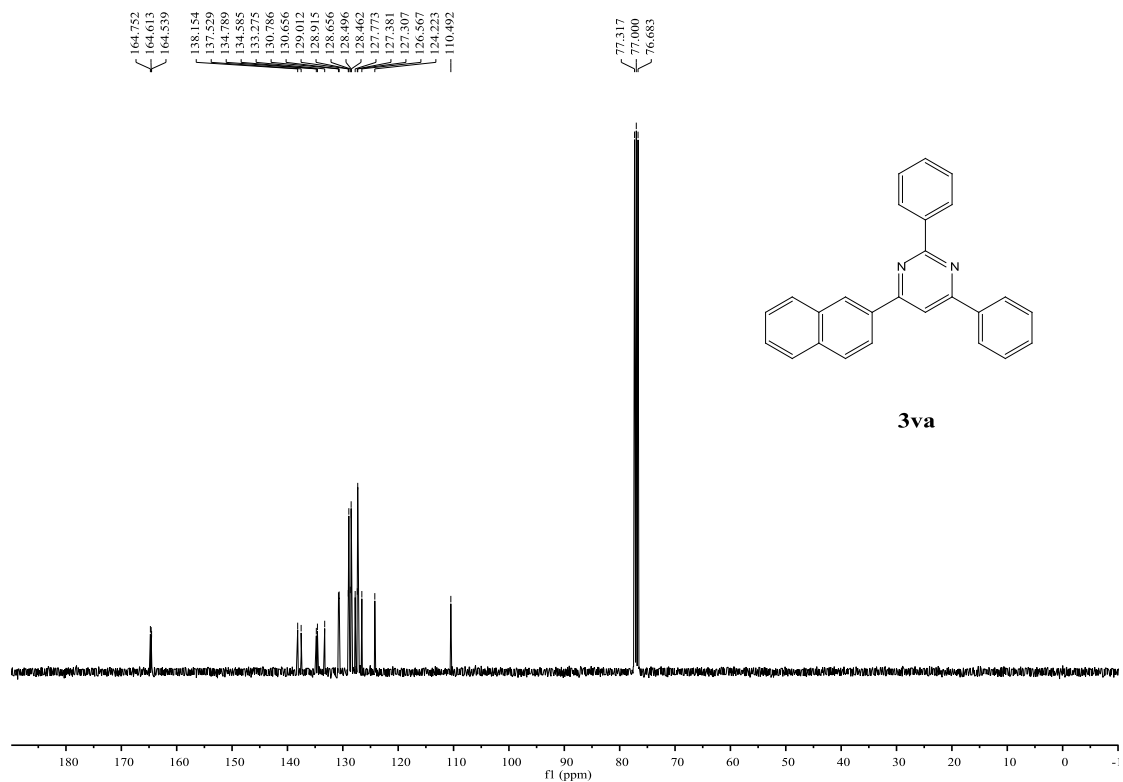

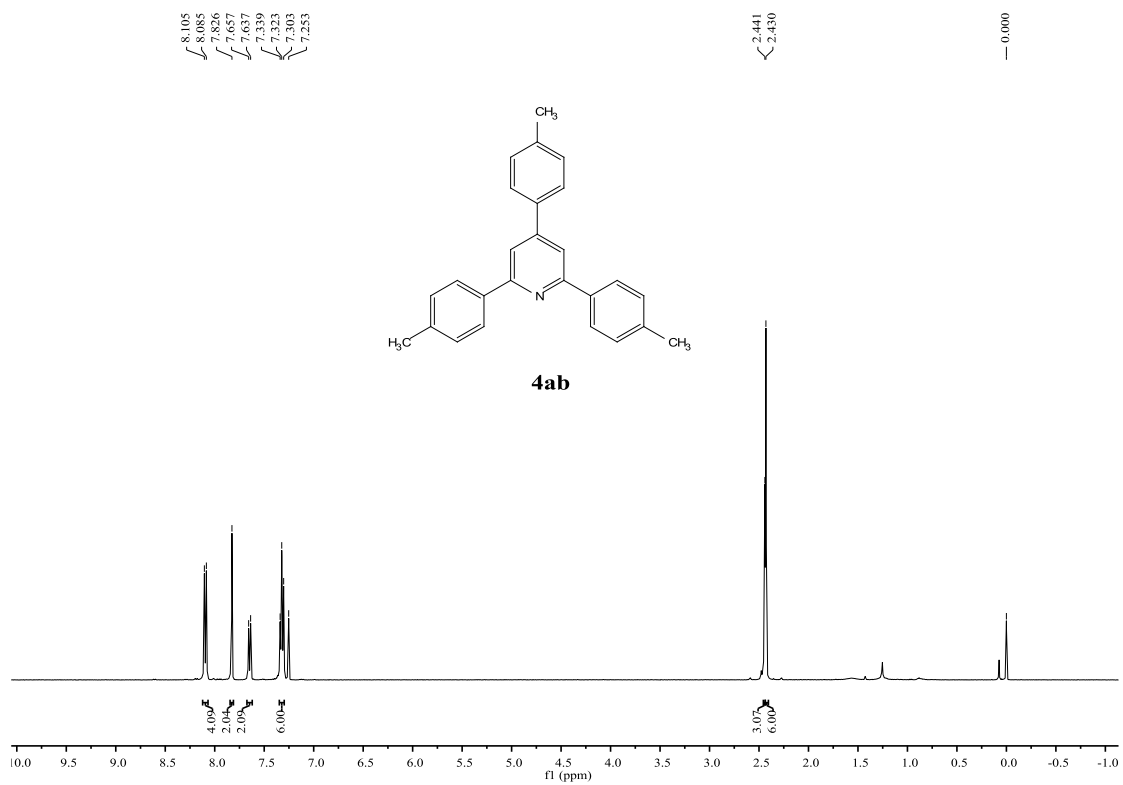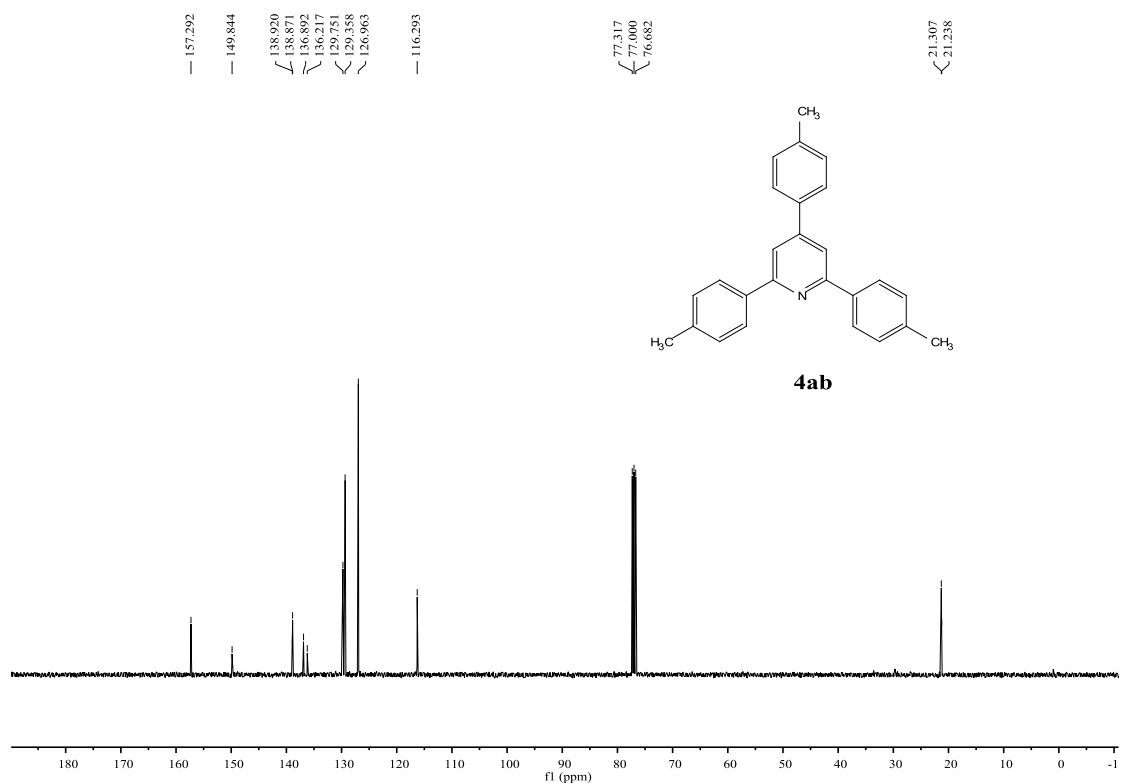



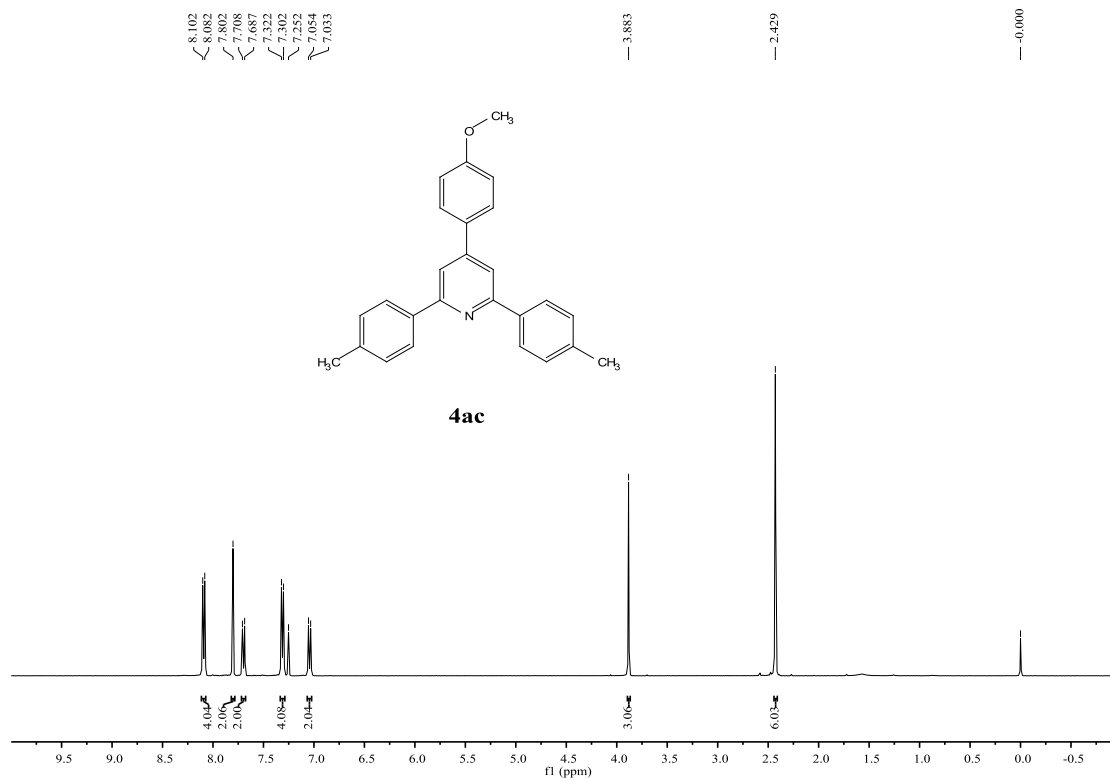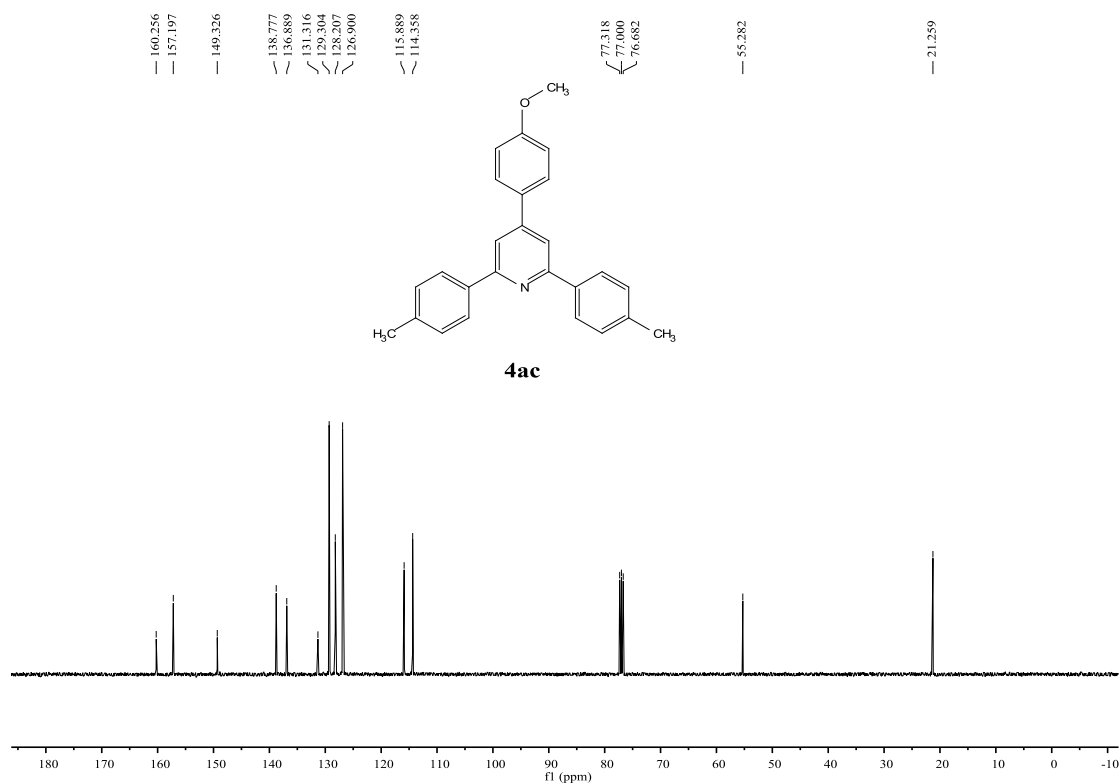

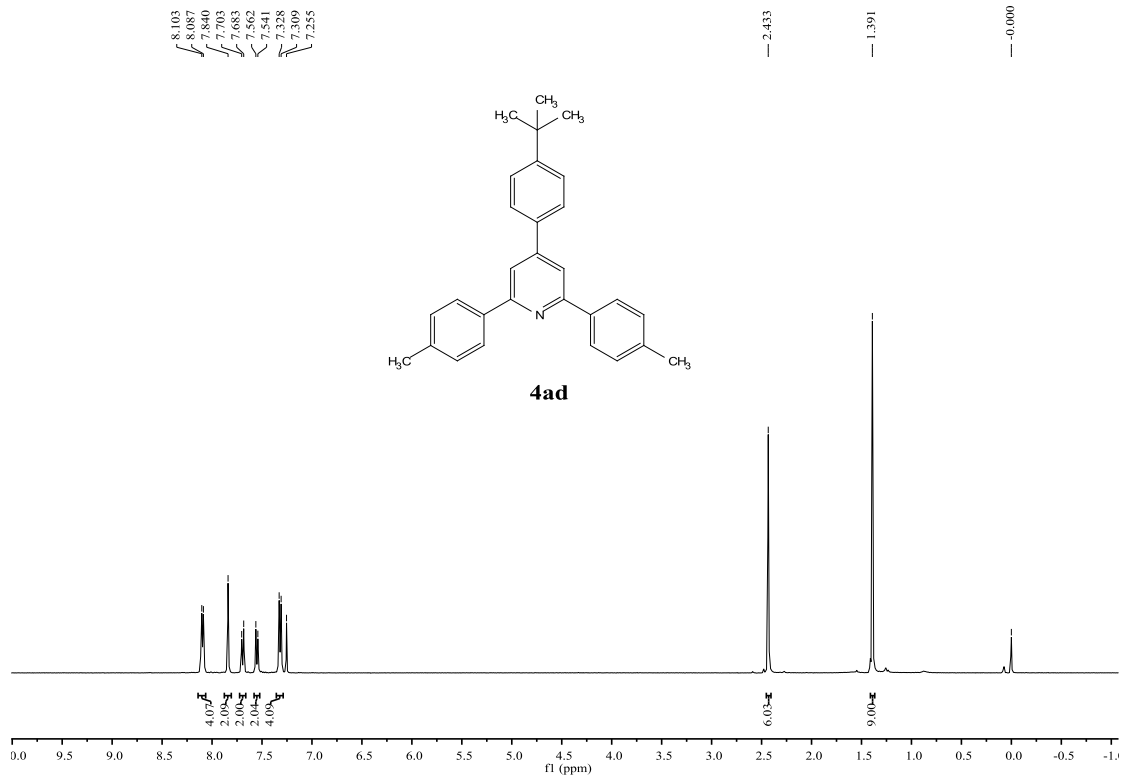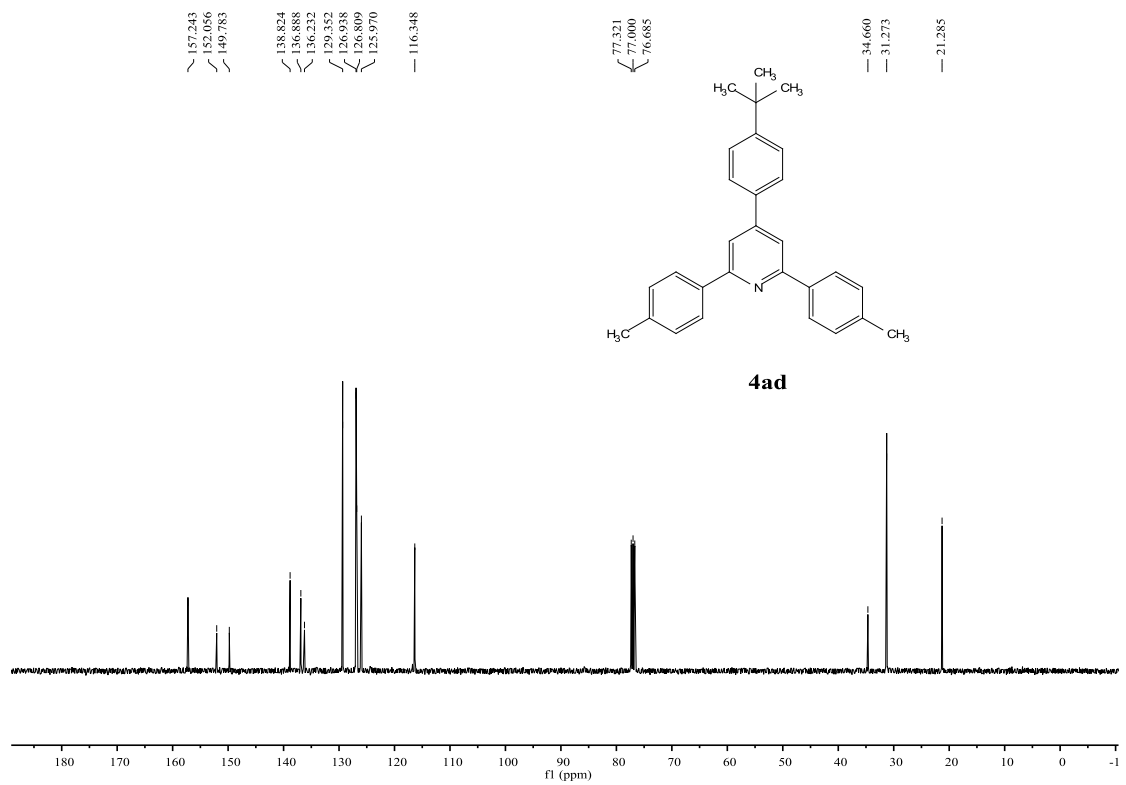

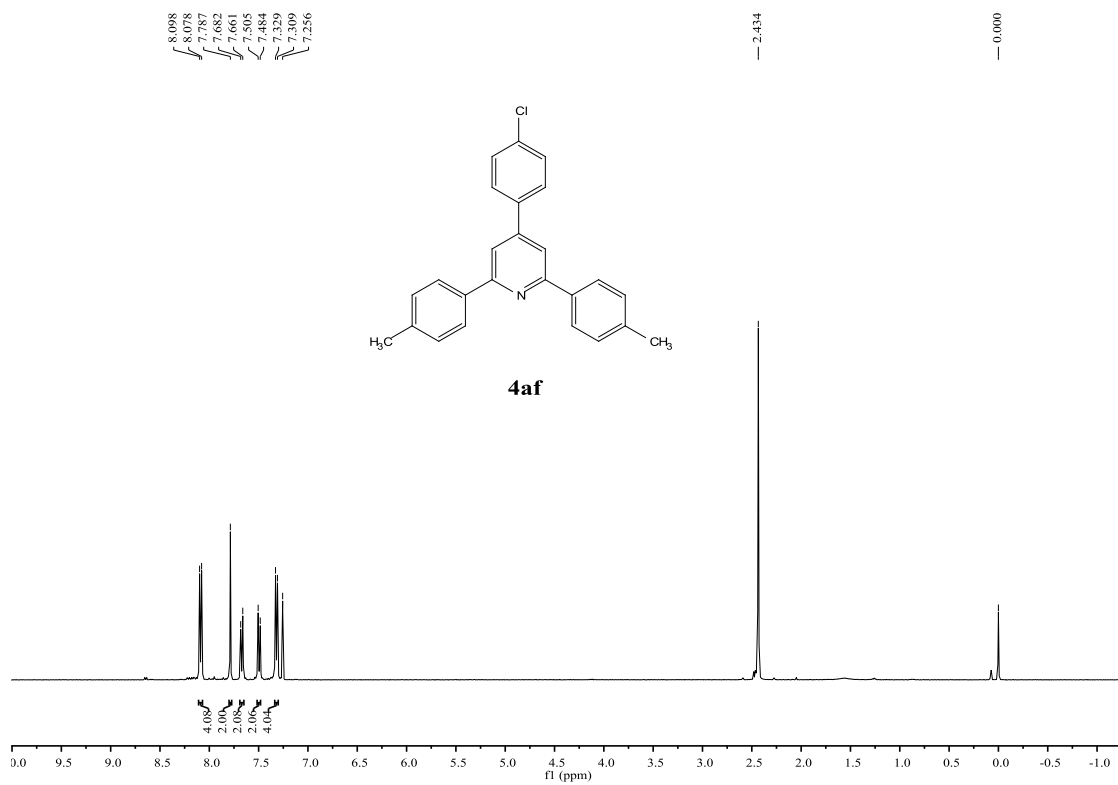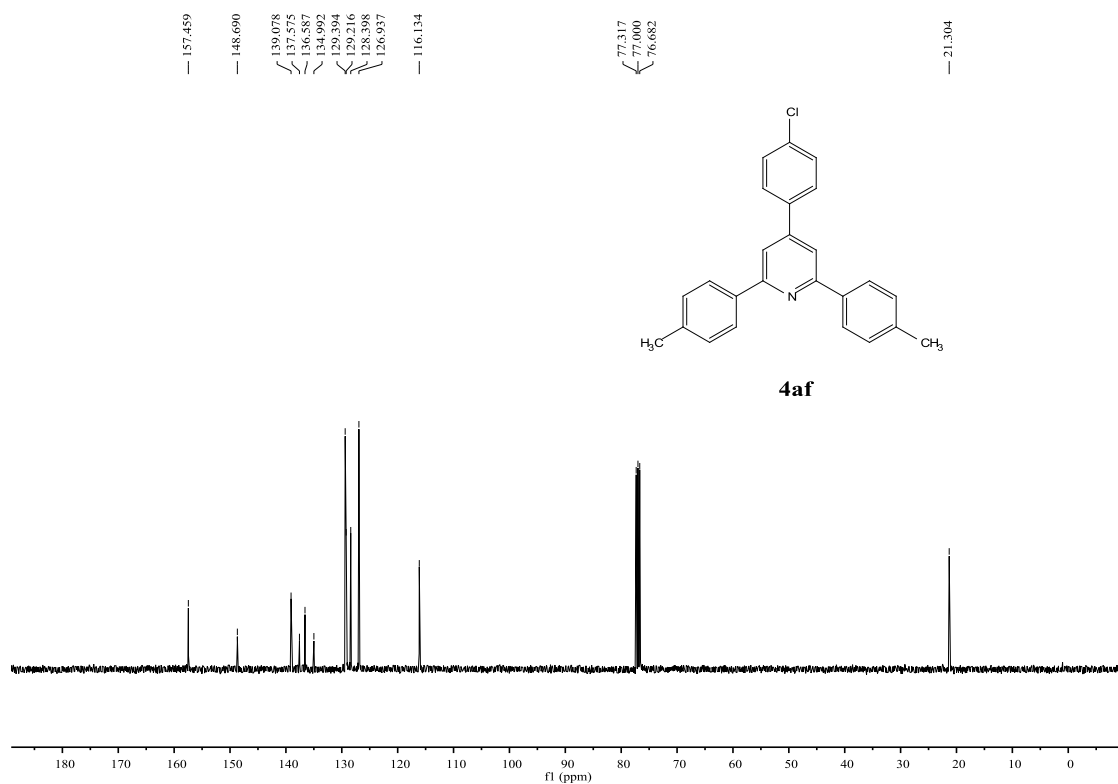

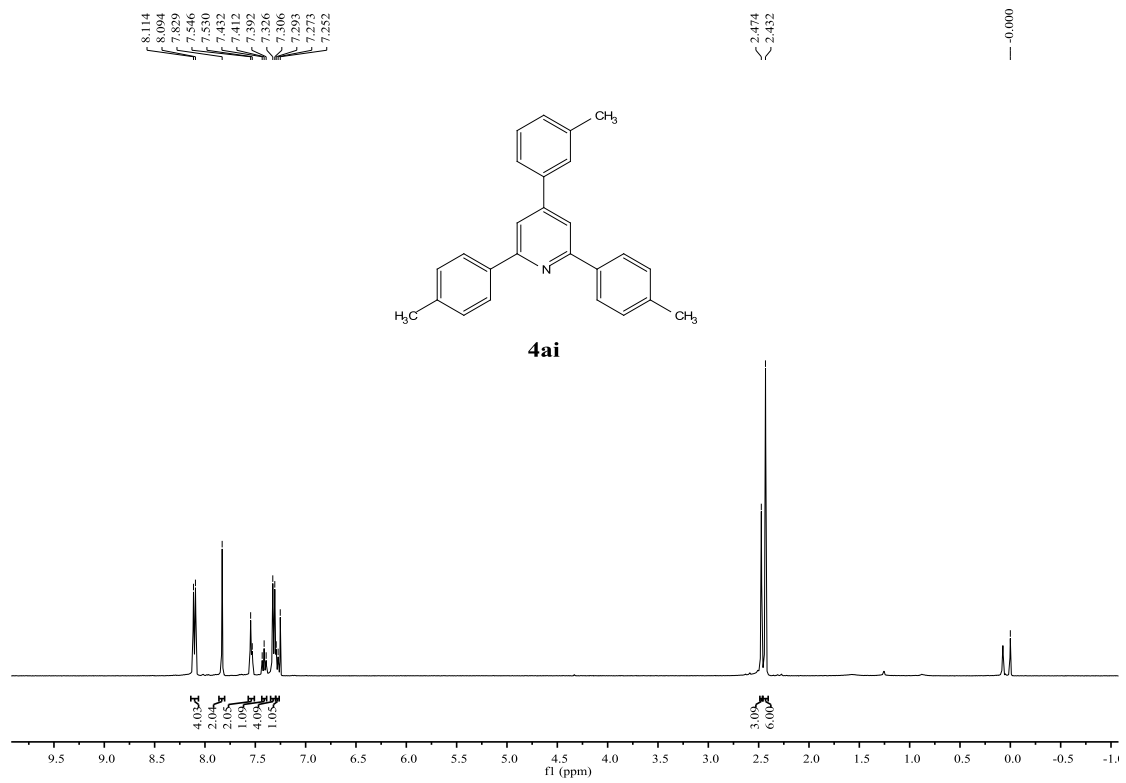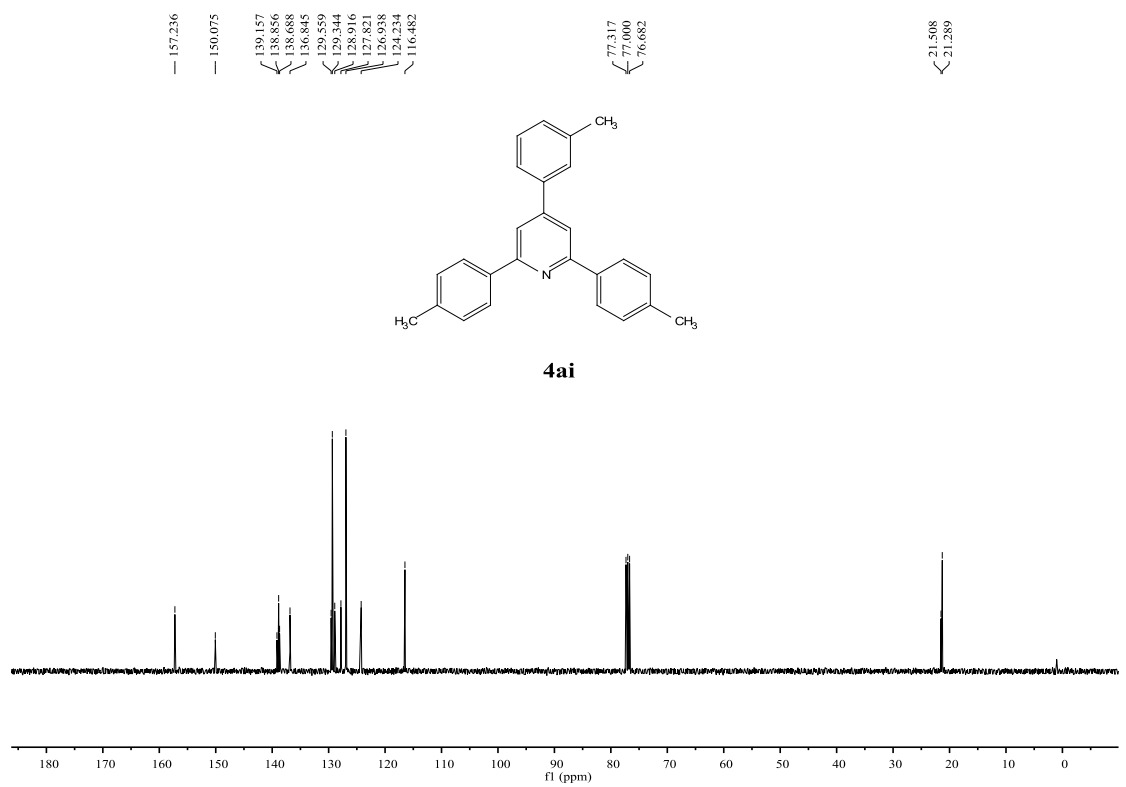

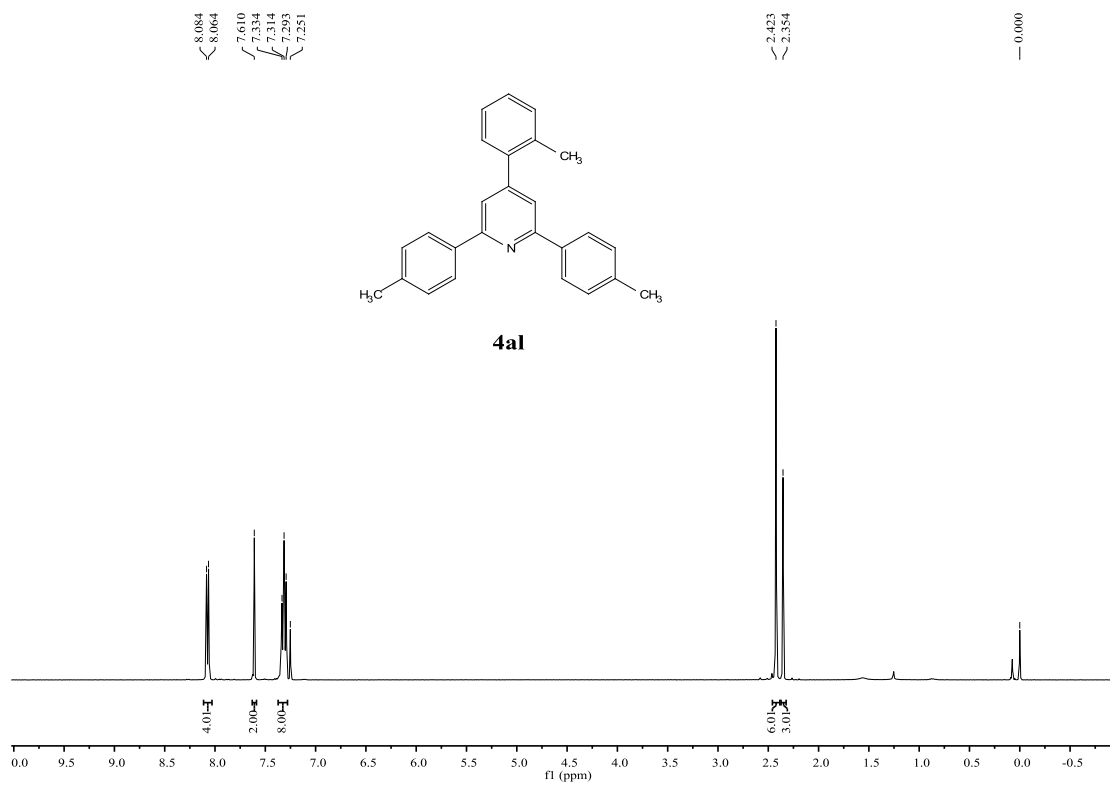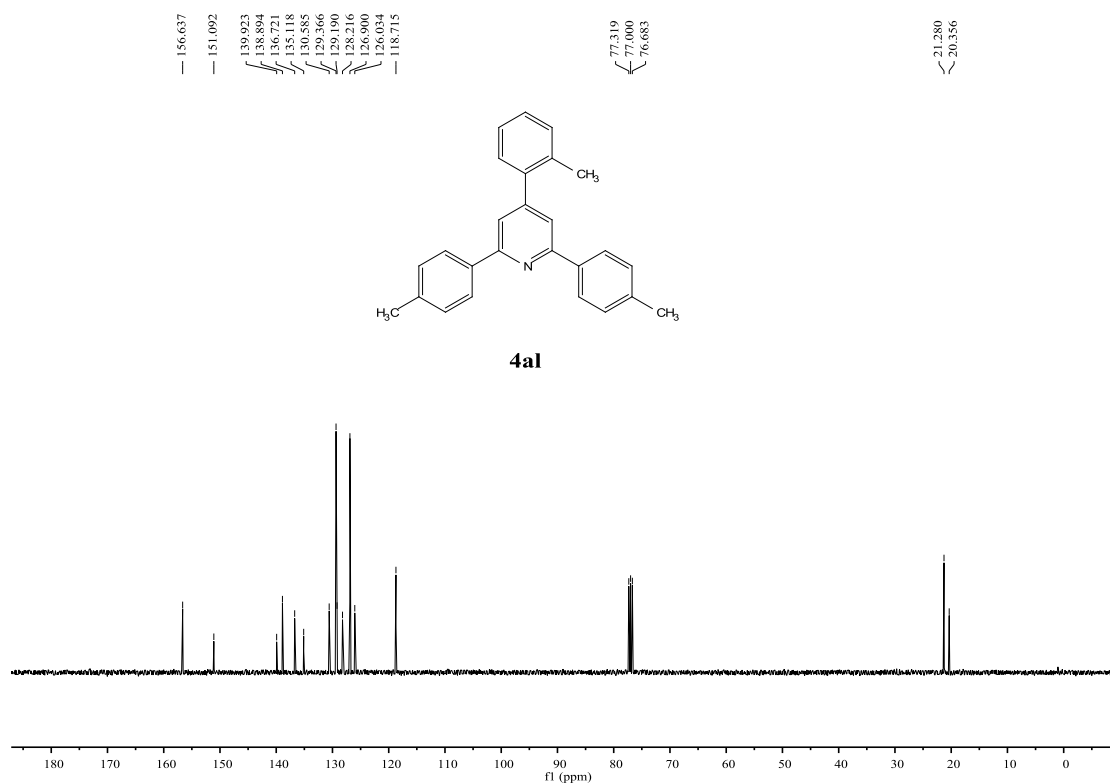

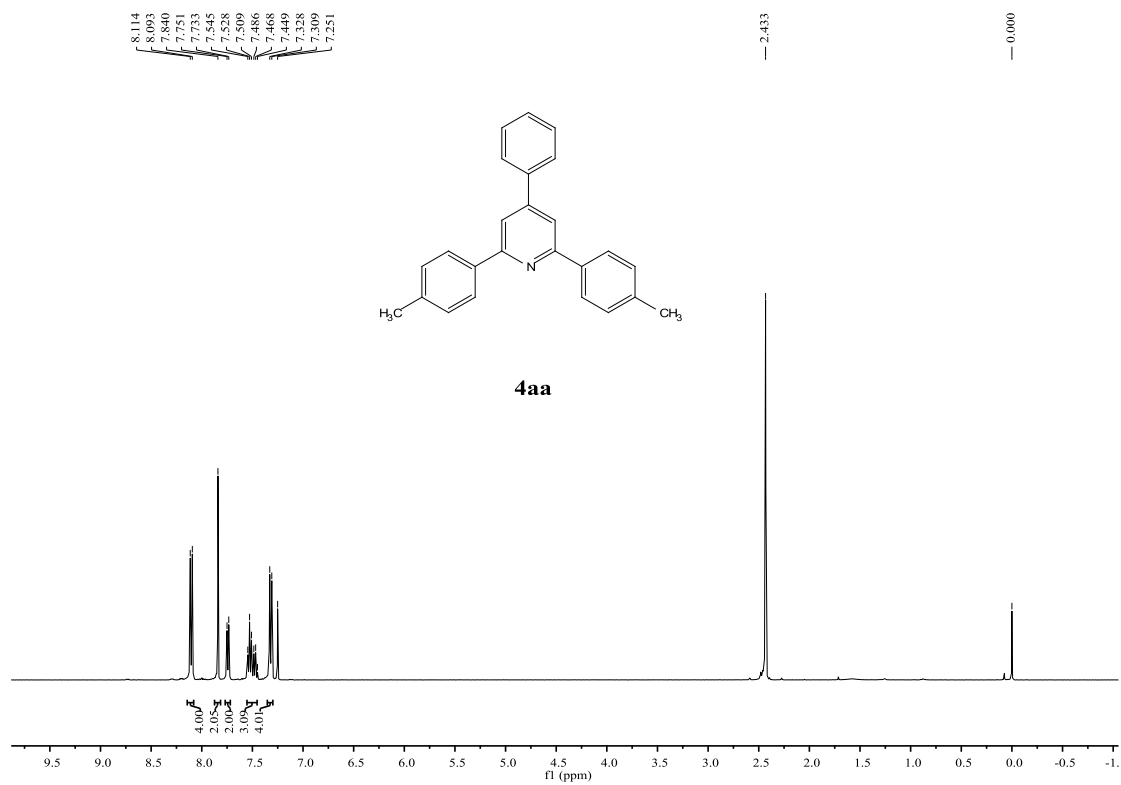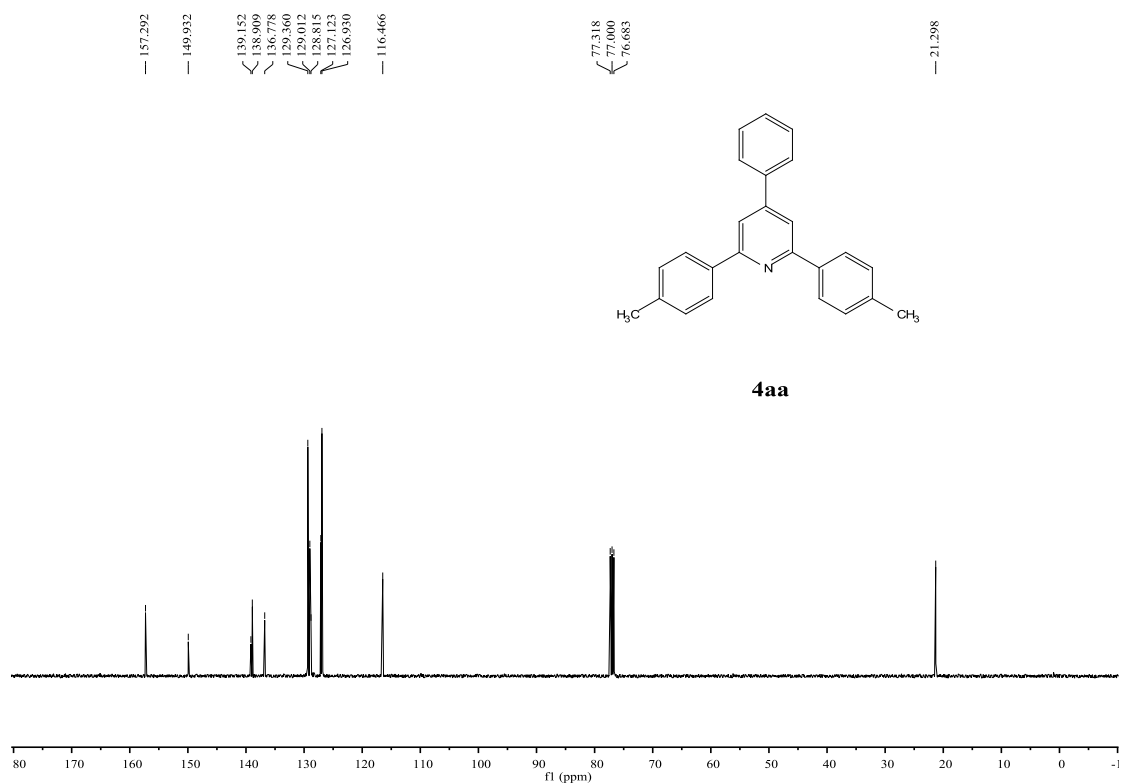

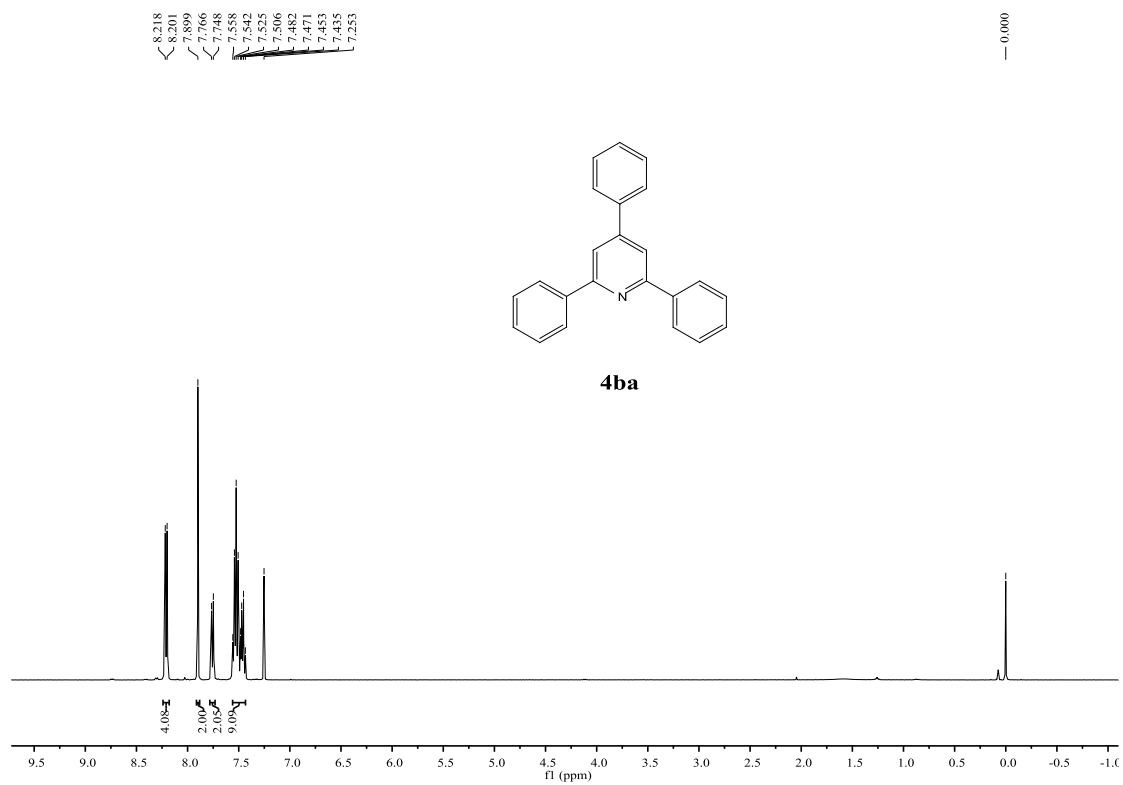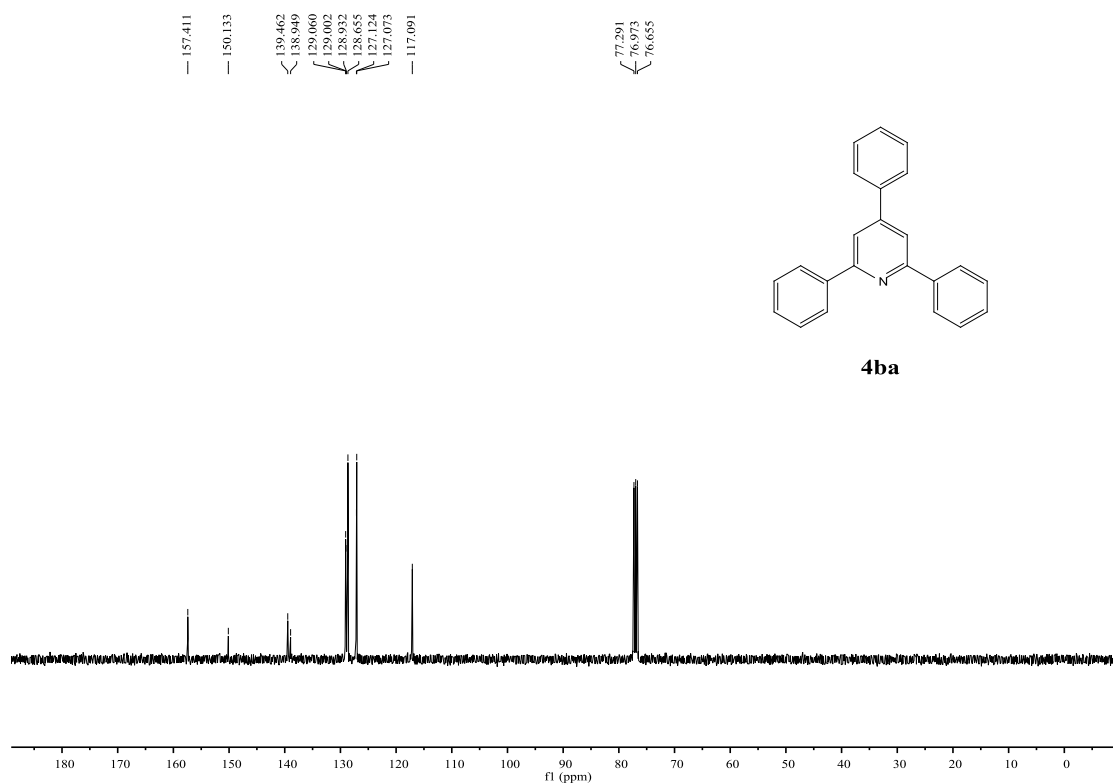

8.141  
8.119  
7.856  
7.737  
7.720  
7.559  
7.542  
7.524  
7.509  
7.494  
7.473  
7.257

— 0.000

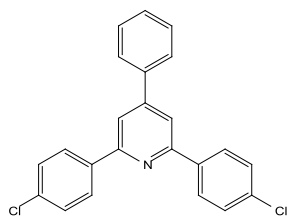

**4ga**

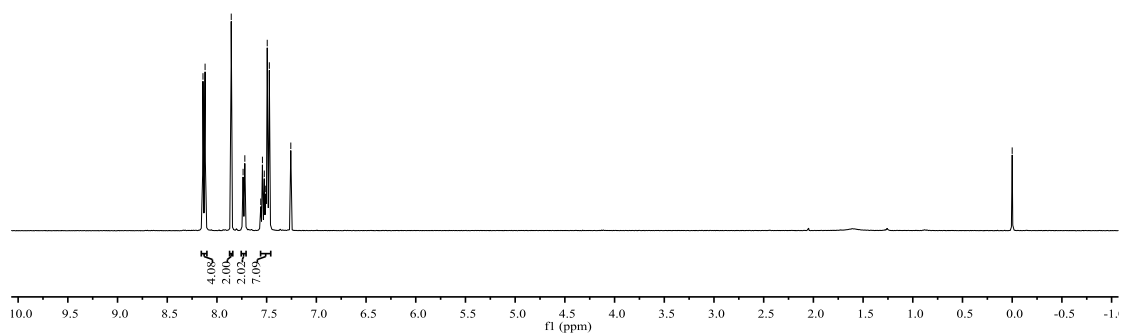

156.287  
150.522  
138.623  
137.698  
135.244  
129.181  
129.164  
128.888  
128.319  
127.127  
117.077

77.318  
77.000  
76.683

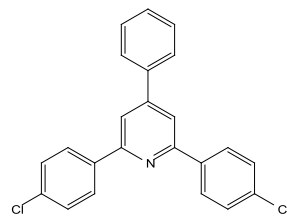

**4ga**

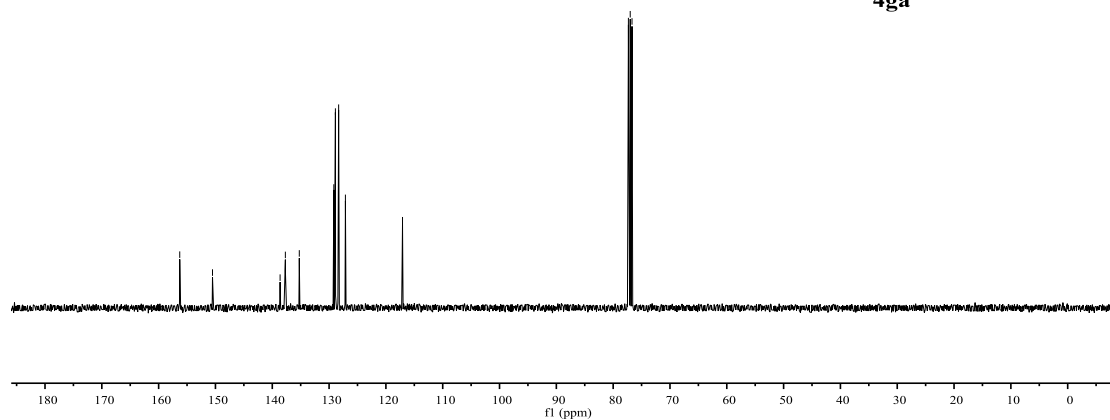



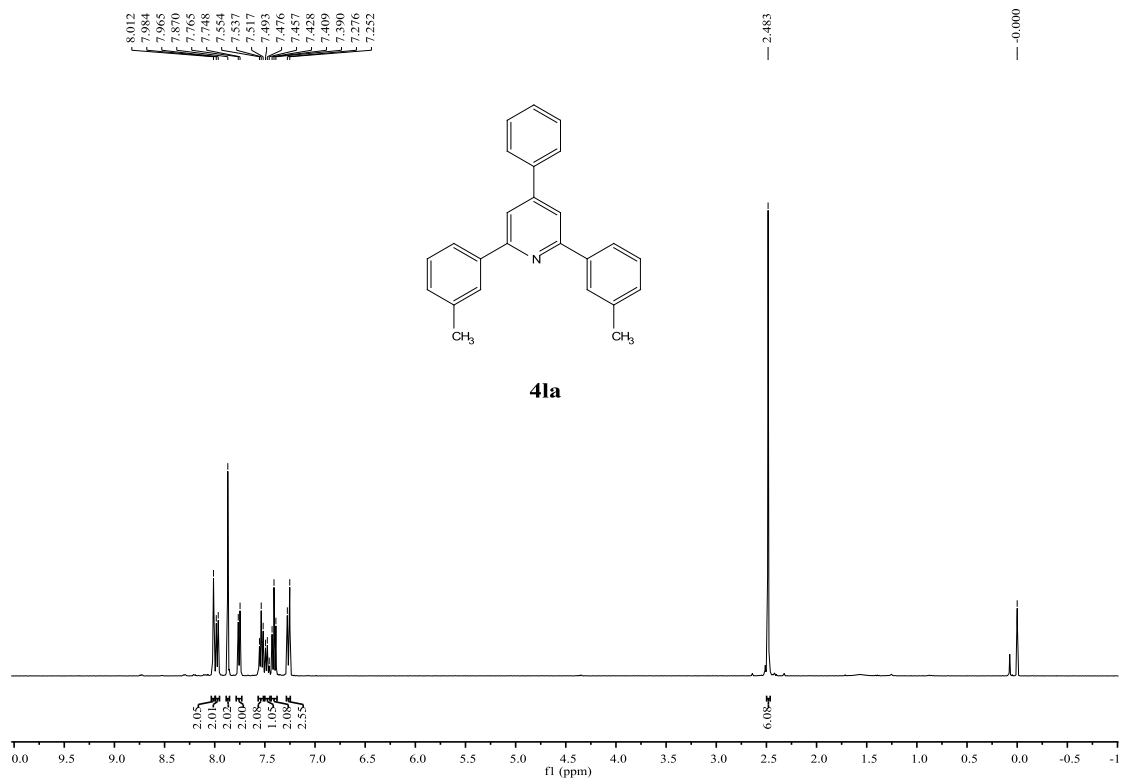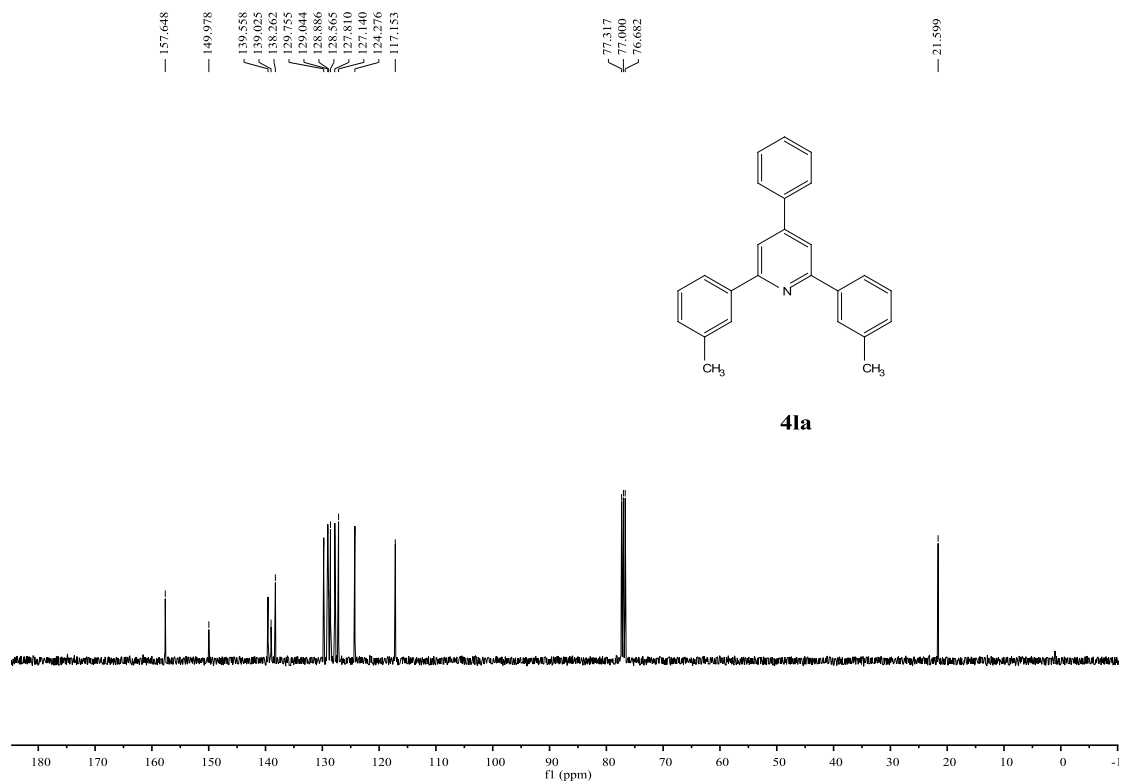

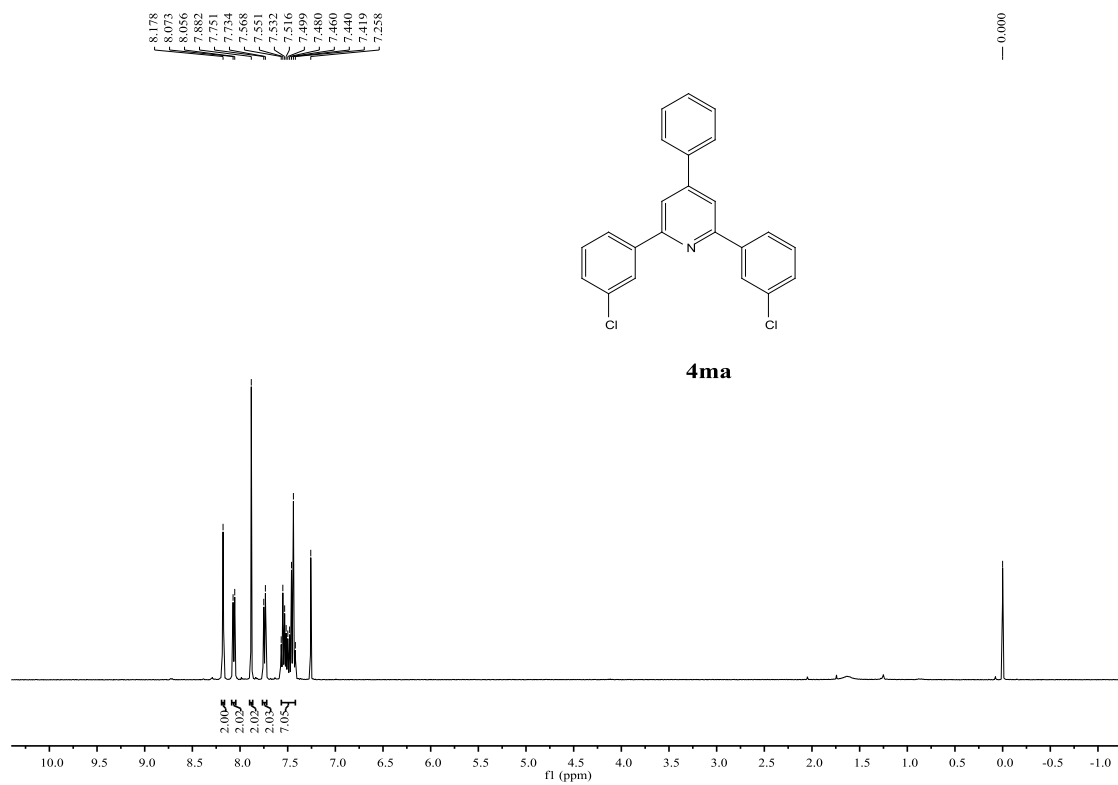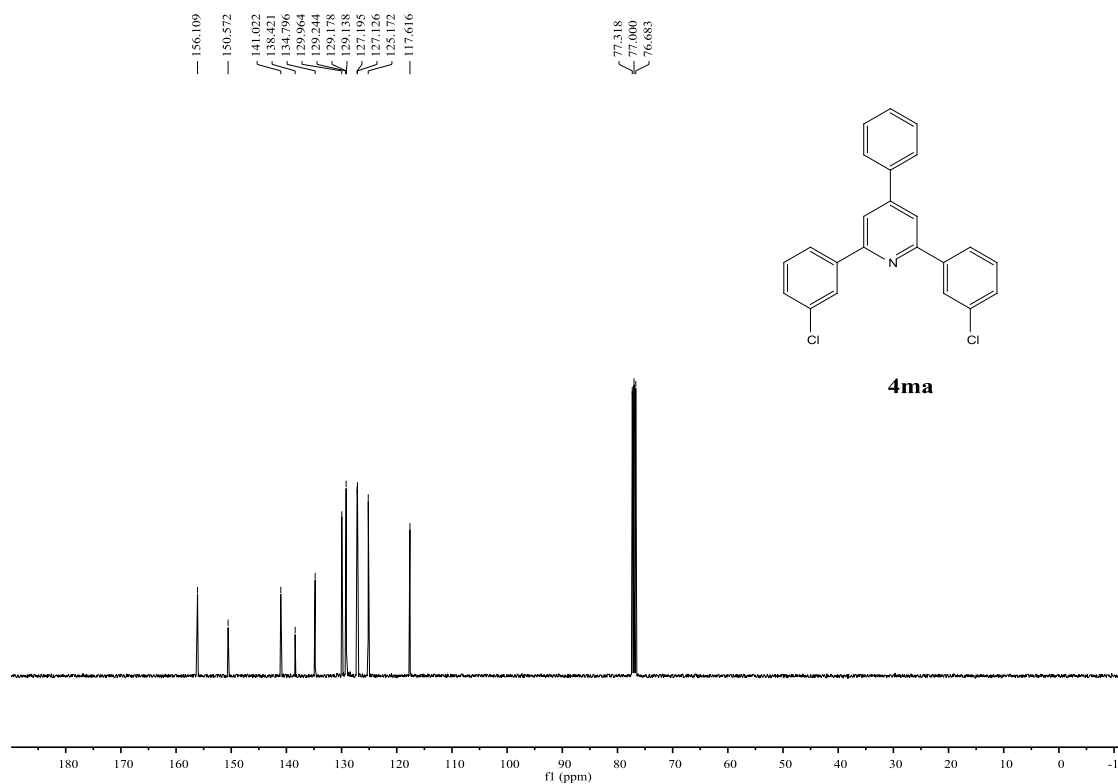

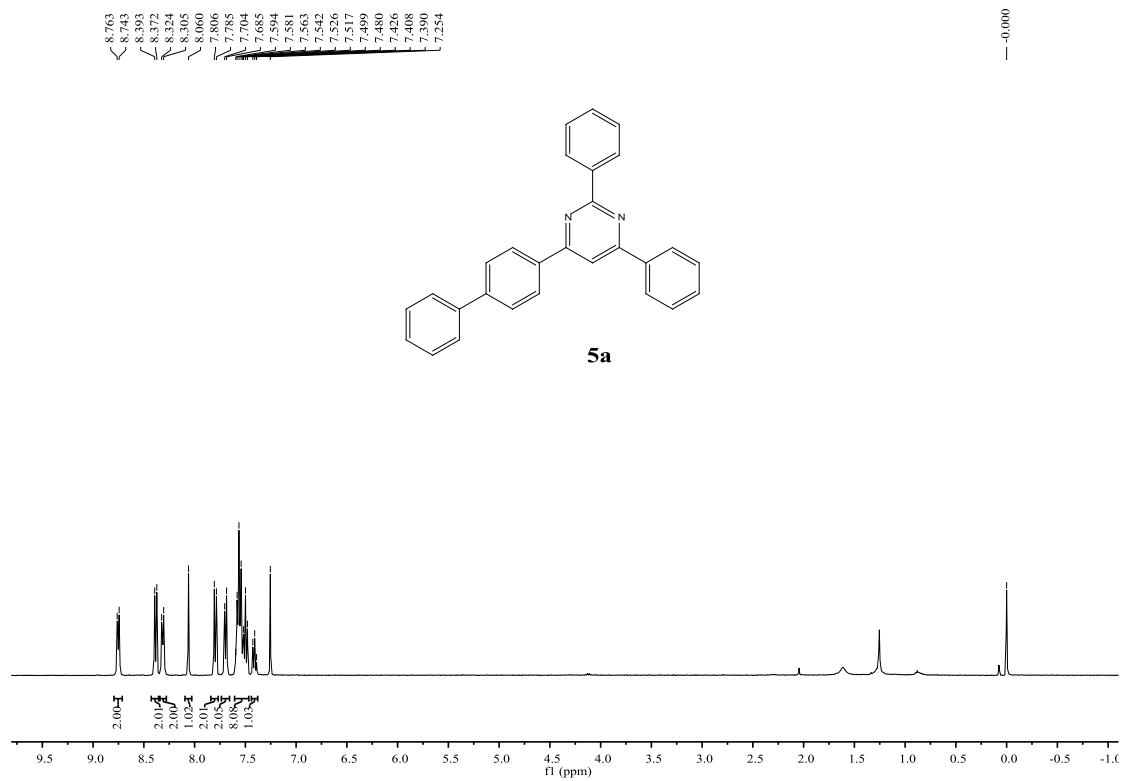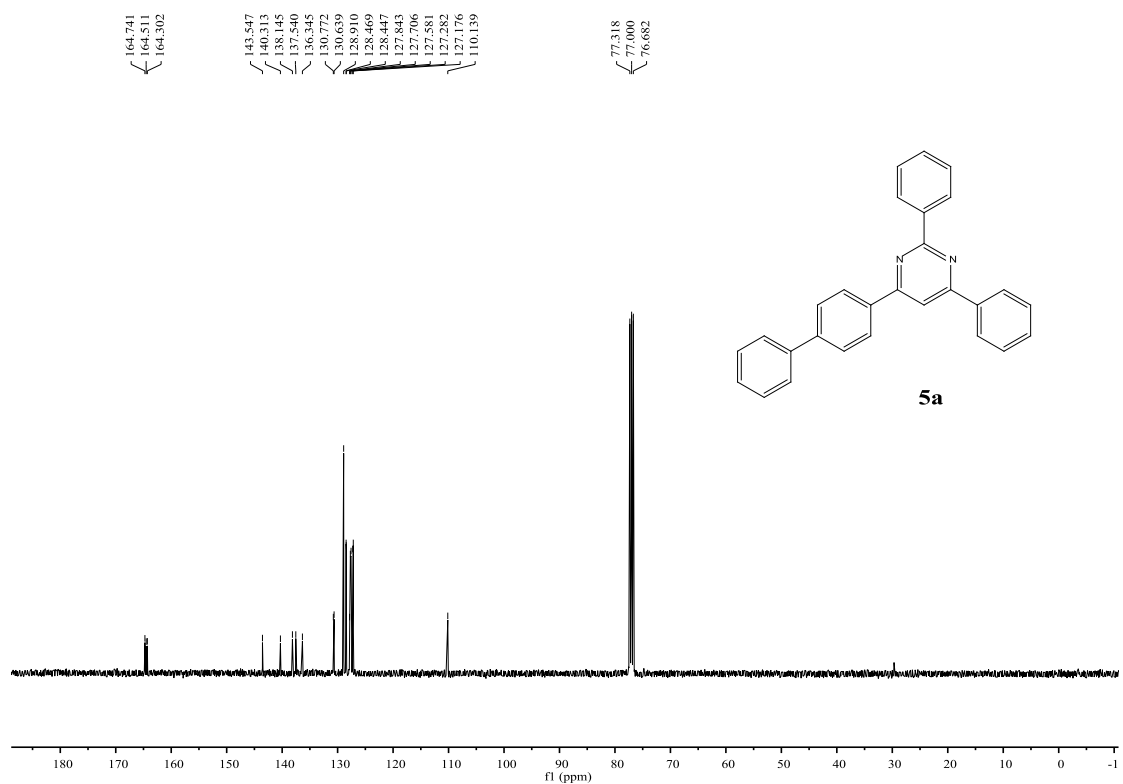

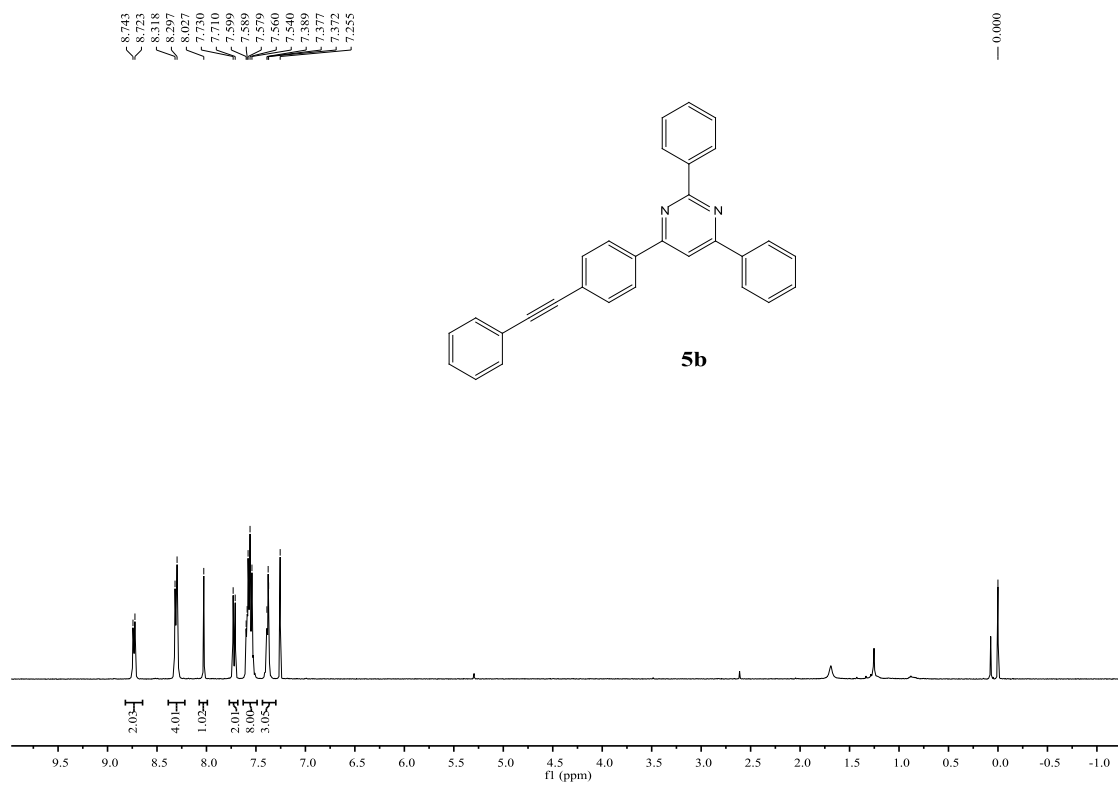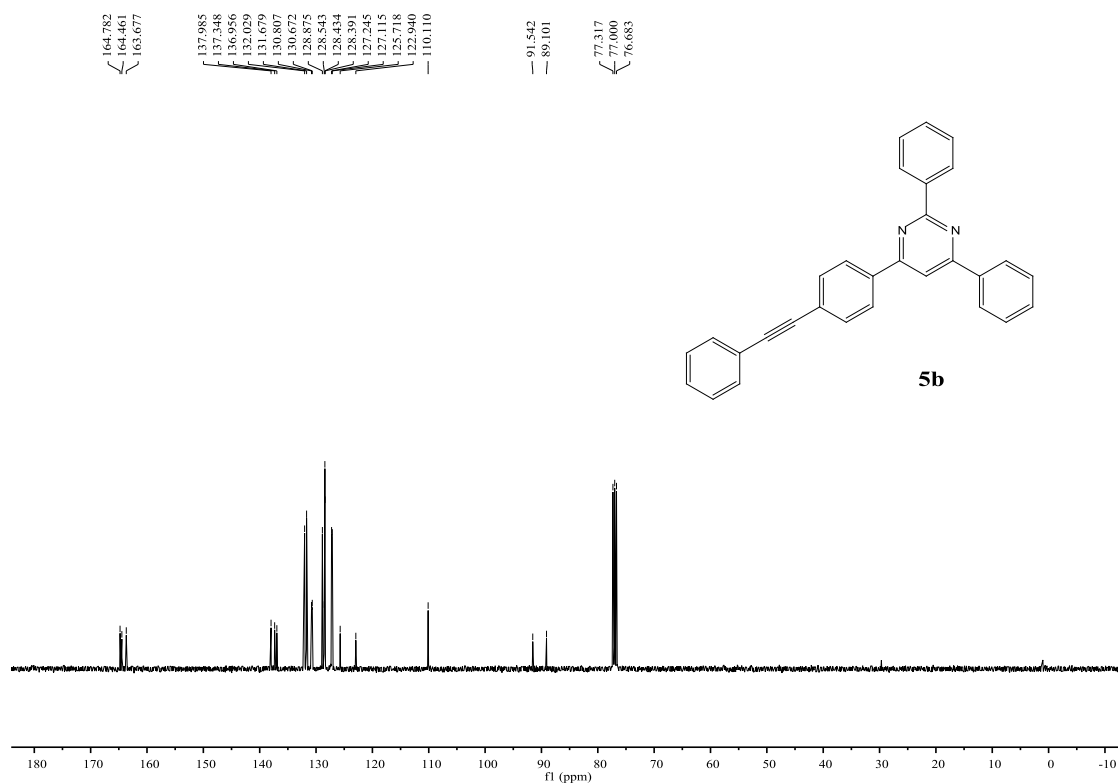

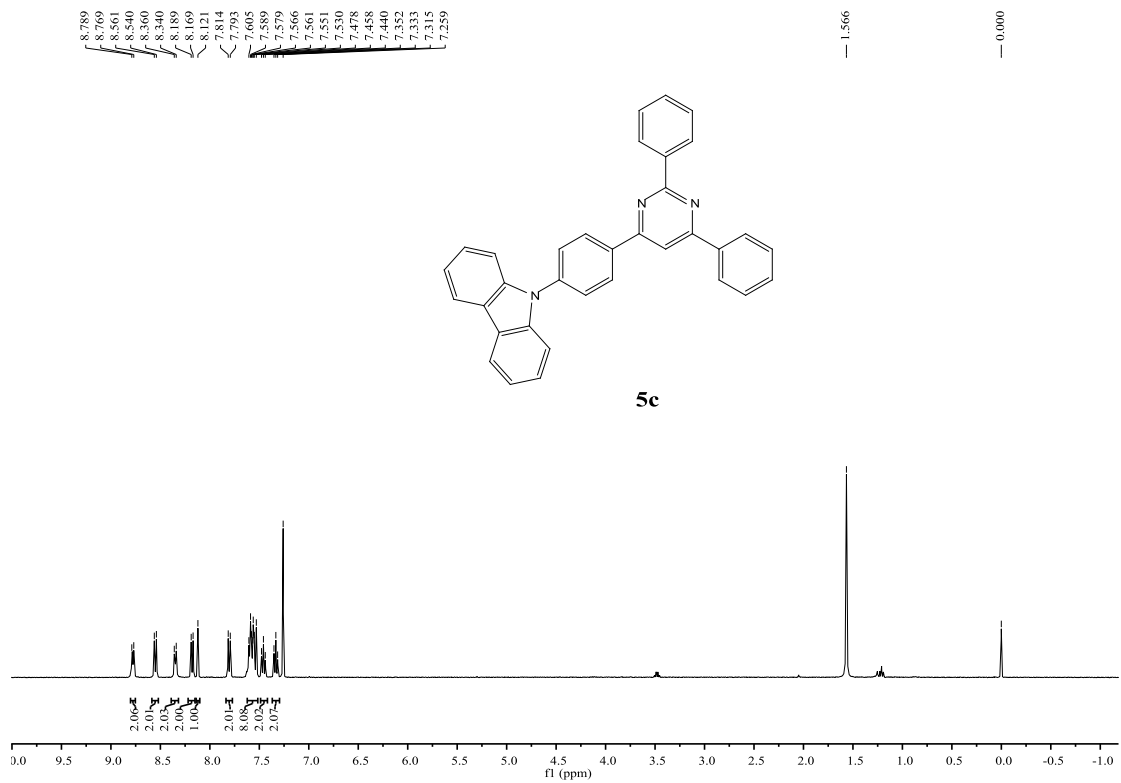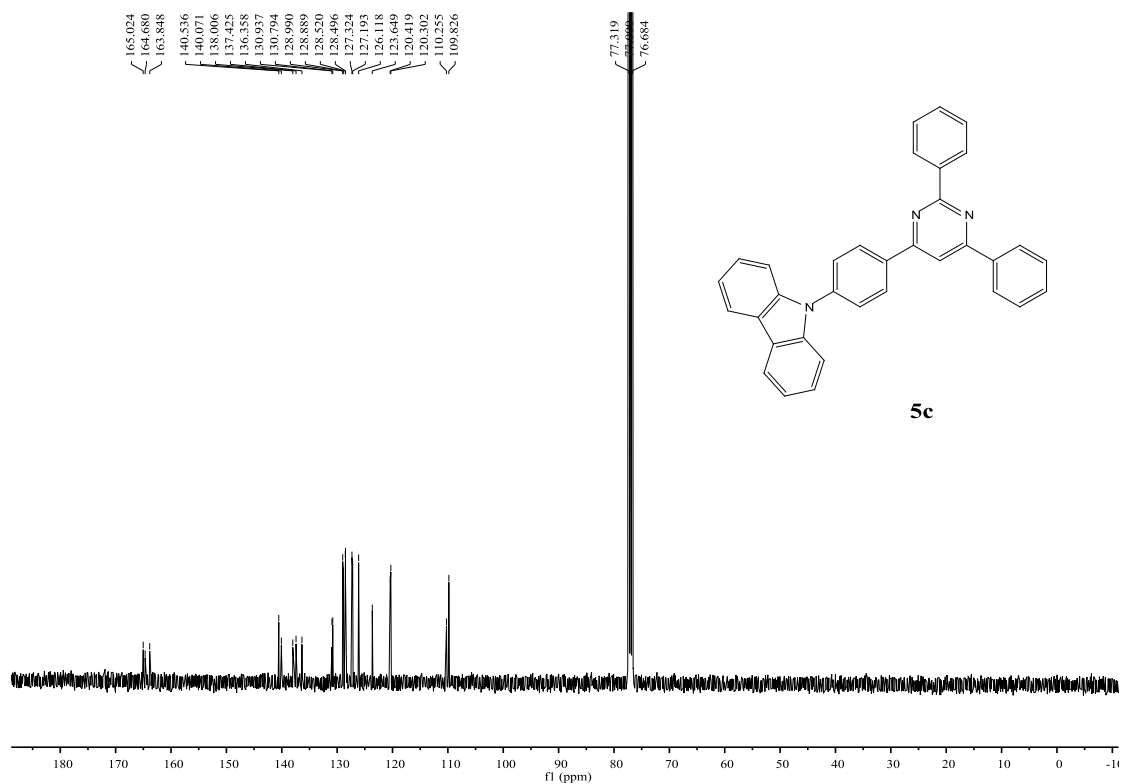

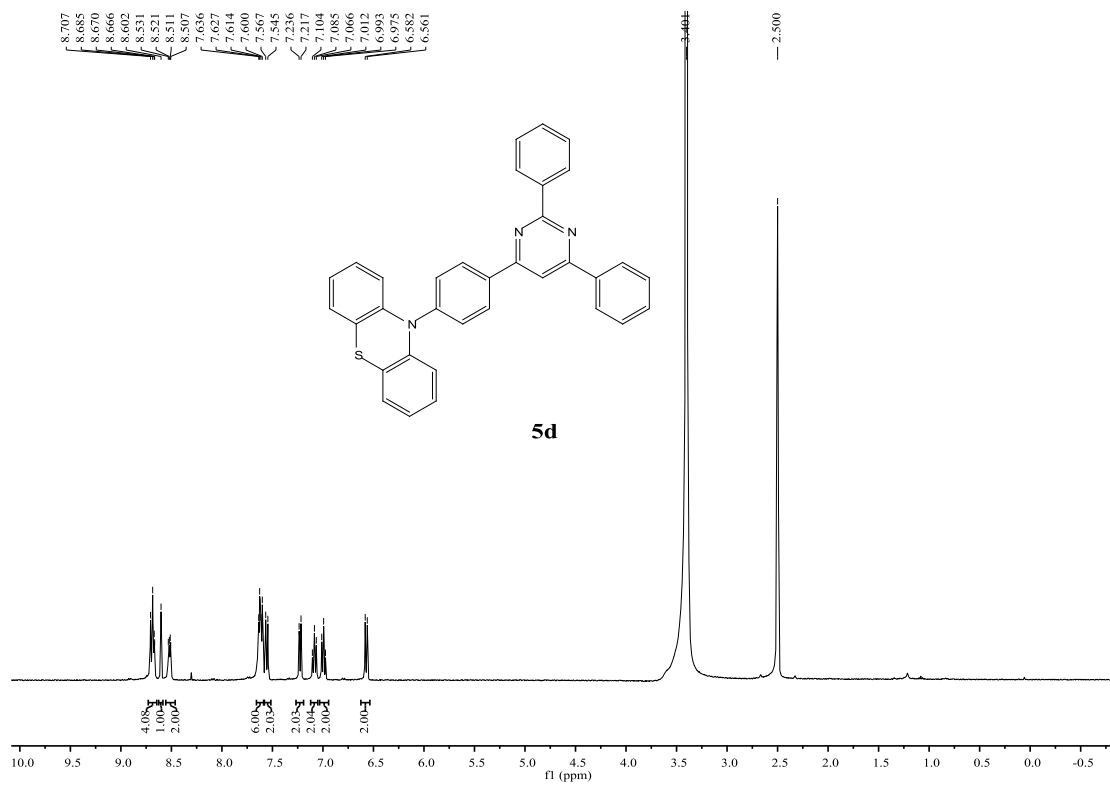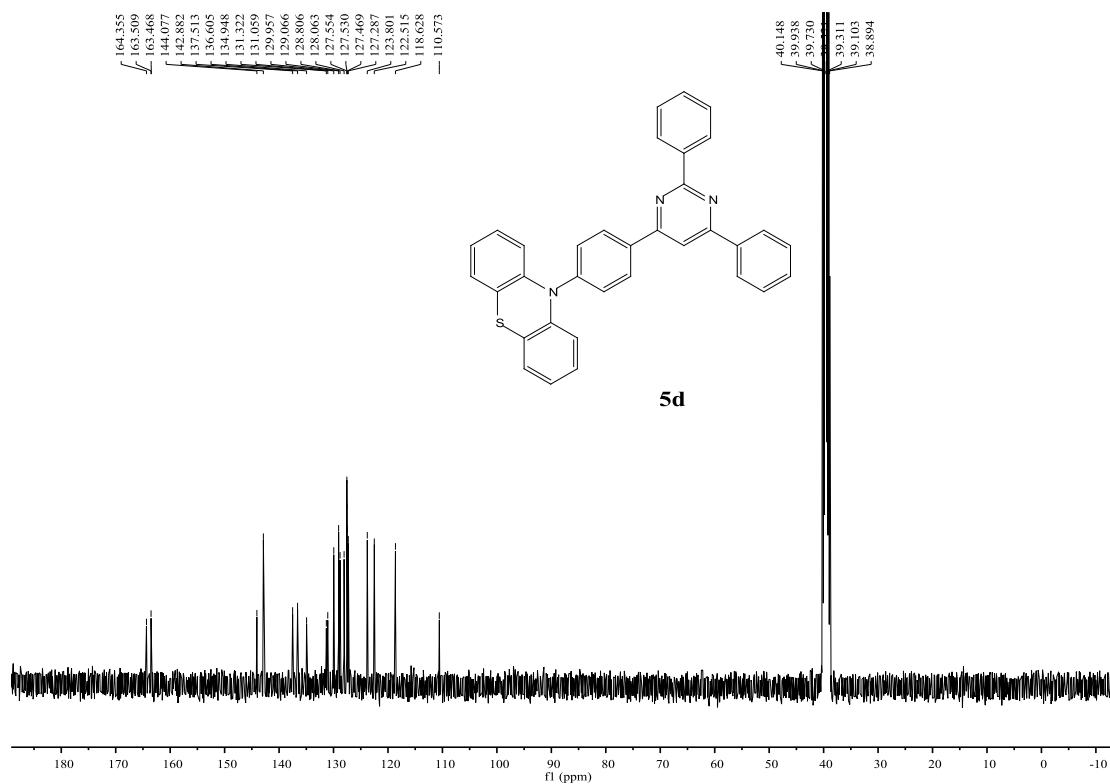

Supplement: c9gc02077b1.pdf [file c9gc02077b1.pdf]
